# Supplementary material
Source: PubMed Central journal article supplement (PMC7111902)
Supplement: mmc3.pdf [file mmc3.pdf]

Supplementary Table 1. BLAST results for 1,363 viral sequences

| Viral family | Tool   | Sample        | Length (nt) | Contig ID                           | Accession | Description                             | E-value      |                                                                 |           |                                                                |           |
|--------------|--------|---------------|-------------|-------------------------------------|-----------|-----------------------------------------|--------------|-----------------------------------------------------------------|-----------|----------------------------------------------------------------|-----------|
| Adenoviridae | blastn | lu            | 454         | 1525132                             | HQ413315  | Human adenovirus 6 isolate Tonsil 99    | 5.00E-154    |                                                                 |           |                                                                |           |
|              |        | lu            | 115         | NODE_799831_length_85_cov_5.776471  | HQ413315  | Human adenovirus 6 isolate Tonsil 99    | 8.00E-51     |                                                                 |           |                                                                |           |
|              |        | lu            | 93          | 1165790                             | HQ413315  | Human adenovirus 6 isolate Tonsil 99    | 1.00E-37     |                                                                 |           |                                                                |           |
|              |        | lu            | 90          | node_590642                         | EU128937  | Human adenovirus 2 pIIIA (pIIIA)        | 3.00E-34     |                                                                 |           |                                                                |           |
|              |        | lu            | 97          | node_2439213                        | HQ413315  | Human adenovirus 6 isolate Tonsil 99    | 4.00E-33     |                                                                 |           |                                                                |           |
|              |        | lu            | 79          | node_1558736                        | AJ293917  | Human adenovirus type 2 early E3 region | 1.00E-31     |                                                                 |           |                                                                |           |
|              |        | lu            | 77          | node_5198546                        | HQ413315  | Human adenovirus 6 isolate Tonsil 99    | 5.00E-31     |                                                                 |           |                                                                |           |
|              |        | lu            | 80          | node_2114895                        | EU128937  | Human adenovirus 2 pIIIA (pIIIA)        | 2.00E-30     |                                                                 |           |                                                                |           |
|              |        | lu            | 100         | NODE_1346303_length_70_cov_1.200000 | HQ413315  | Human adenovirus 6 isolate Tonsil 99    | 3.00E-30     |                                                                 |           |                                                                |           |
|              |        | lu            | 86          | node_1833672                        | HQ413315  | Human adenovirus 6 isolate Tonsil 99    | 7.00E-30     |                                                                 |           |                                                                |           |
|              |        | lu            | 81          | node_1856966                        | HQ413315  | Human adenovirus 6 isolate Tonsil 99    | 3.00E-28     |                                                                 |           |                                                                |           |
|              |        | lu            | 93          | node_379696                         | EU128937  | Human adenovirus 2 pIIIA (pIIIA)        | 4.00E-28     |                                                                 |           |                                                                |           |
|              |        | lu            | 77          | node_1593032                        | EU128937  | Human adenovirus 2 pIIIA (pIIIA)        | 1.00E-26     |                                                                 |           |                                                                |           |
|              |        | lu            | 130         | 71222                               | EU128937  | Human adenovirus 2 pIIIA (pIIIA)        | 5.00E-24     |                                                                 |           |                                                                |           |
|              |        | lu            | 87          | node_3718540                        | HQ413315  | Human adenovirus 6 isolate Tonsil 99    | 6.00E-16     |                                                                 |           |                                                                |           |
|              |        | th            | 229         | 370912                              | HQ413315  | Human adenovirus 6 isolate Tonsil 99    | 8.00E-94     |                                                                 |           |                                                                |           |
|              |        | th            | 106         | NODE_83428_length_76_cov_42.276318  | EU128937  | Human adenovirus 2 pIIIA (pIIIA)        | 2.00E-47     |                                                                 |           |                                                                |           |
|              |        | th            | 104         | 90313                               | HQ413315  | Human adenovirus 6 isolate Tonsil 99    | 1.00E-43     |                                                                 |           |                                                                |           |
|              |        | th            | 124         | 404943                              | EU128937  | Human adenovirus 2 pIIIA (pIIIA)        | 3.00E-40     |                                                                 |           |                                                                |           |
|              |        | th            | 124         | 599236                              | AF534906  | Human adenovirus type 1 subgroup C      | 4.00E-39     |                                                                 |           |                                                                |           |
|              |        | th            | 87          | node_623862                         | EU128937  | Human adenovirus 2 pIIIA (pIIIA)        | 3.00E-34     |                                                                 |           |                                                                |           |
|              |        | th            | 85          | node_648061                         | EU128937  | Human adenovirus 2 pIIIA (pIIIA)        | 3.00E-33     |                                                                 |           |                                                                |           |
|              |        | th            | 85          | node_302592                         | HQ413315  | Human adenovirus 6 isolate Tonsil 99    | 6.00E-31     |                                                                 |           |                                                                |           |
|              |        | th            | 83          | node_698669                         | HQ413315  | Human adenovirus 6 isolate Tonsil 99    | 2.00E-15     |                                                                 |           |                                                                |           |
|              |        | th            | 91          | NODE_101571_length_61_cov_22.606558 | HQ413315  | Human adenovirus 6 isolate Tonsil 99    | 2.00E-11     |                                                                 |           |                                                                |           |
|              |        | th            | 94          | NODE_36422_length_64_cov_4.171875   | HQ413315  | Human adenovirus 6 isolate Tonsil 99    | 9.00E-10     |                                                                 |           |                                                                |           |
|              |        | th            | 87          | NODE_95209_length_57_cov_7.228070   | EU128937  | Human adenovirus 2 pIIIA (pIIIA)        | 2.00E-06     |                                                                 |           |                                                                |           |
|              |        | ur            | 105         | node_50918                          | HQ413315  | Human adenovirus 6 isolate Tonsil 99    | 6.00E-47     |                                                                 |           |                                                                |           |
|              |        | ur            | 104         | NODE_30943_length_74_cov_6.175676   | EU128937  | Human adenovirus 2 pIIIA (pIIIA)        | 1.00E-43     |                                                                 |           |                                                                |           |
|              |        | ur            | 190         | 187992                              | HQ413315  | Human adenovirus 6 isolate Tonsil 99    | 3.00E-42     |                                                                 |           |                                                                |           |
|              |        | ur            | 91          | node_151103                         | HQ413315  | Human adenovirus 6 isolate Tonsil 99    | 3.00E-39     |                                                                 |           |                                                                |           |
|              |        | ur            | 84          | node_254756                         | HQ413315  | Human adenovirus 6 isolate Tonsil 99    | 2.00E-35     |                                                                 |           |                                                                |           |
|              |        | ur            | 87          | node_234859                         | HQ413315  | Human adenovirus 6 isolate Tonsil 99    | 7.00E-35     |                                                                 |           |                                                                |           |
|              |        | ur            | 77          | node_326310                         | HQ413315  | Human adenovirus 6 isolate Tonsil 99    | 6.00E-30     |                                                                 |           |                                                                |           |
|              |        | ur            | 78          | node_35008                          | EU128937  | Human adenovirus 2 pIIIA (pIIIA)        | 2.00E-29     |                                                                 |           |                                                                |           |
|              |        | ur            | 156         | NODE_6659_length_126_cov_3.182540   | GJ226970  | Bat adenovirus TJM                      | 8.00E-18     |                                                                 |           |                                                                |           |
|              |        | Adenoviridae  | blastx      | lu                                  | 168       | 1325836                                 | ADM46146     | 52.0 kDa protein [Human adenovirus 57]                          | 1.00E-19  |                                                                |           |
|              |        |               |             | lu                                  | 141       | NODE_26108_length_111_cov_100.045044    | ADM46152     | VI minor core 27.0 kDa protein [Human adenovirus 57]            | 2.00E-05  |                                                                |           |
|              |        |               |             | lu                                  | 80        | node_3332916                            | ADM46152     | VI minor core 27.0 kDa protein [Human adenovirus 57]            | 3.00E-05  |                                                                |           |
|              |        |               |             | th                                  | 229       | NODE_10144_length_199_cov_6.286432      | ADD17111     | hexon capsid protein [Bat adenovirus TJM]                       | 2.00E-33  |                                                                |           |
|              |        |               |             | th                                  | 308       | 678614                                  | P12539       | [Murine adenovirus A] Protein IVA2                              | 1.00E-22  |                                                                |           |
|              |        |               |             | th                                  | 211       | NODE_52087_length_181_cov_4.198895      | AP_000235    | IVA2 [Porcine adenovirus C]                                     | 1.00E-15  |                                                                |           |
|              |        |               |             | th                                  | 104       | 134173                                  | ADM46152     | VI minor core 27.0 kDa protein [Human adenovirus 57]            | 5.00E-09  |                                                                |           |
|              |        |               |             | th                                  | 87        | node_1505399                            | AEP16408     | maturation protein [Equine adenovirus 1]                        | 2.00E-08  |                                                                |           |
|              |        |               |             | th                                  | 82        | node_61504                              | YP_004123737 | IVA2 [Murine adenovirus 2]                                      | 2.00E-06  |                                                                |           |
|              |        |               |             | ur                                  | 203       | 167004                                  | ADM46146     | 52.0 kDa protein [Human adenovirus 57]                          | 3.00E-32  |                                                                |           |
|              |        |               |             | ur                                  | 212       | NODE_27579_length_182_cov_5.164835      | ABG22145     | hexon [Ovine adenovirus 6]                                      | 8.00E-28  |                                                                |           |
|              |        |               |             | ur                                  | 264       | 184394                                  | ABG22145     | hexon [Ovine adenovirus 6]                                      | 3.00E-21  |                                                                |           |
|              |        |               |             | ur                                  | 163       | NODE_23077_length_133_cov_4.954887      | AEP16419     | early E2A DNA-binding protein [Equine adenovirus 1]             | 2.00E-14  |                                                                |           |
|              |        |               |             | ur                                  | 130       | NODE_27778_length_100_cov_3.270000      | YP_004782109 | hexon [Bat adenovirus 2 ]                                       | 2.00E-14  |                                                                |           |
|              |        |               |             | ur                                  | 139       | NODE_20581_length_109_cov_3.944954      | ACV96785     | hexon [Alpaca adenovirus CA/2007]                               | 2.00E-12  |                                                                |           |
|              |        |               |             | ur                                  | 90        | 114411                                  | YP_094041    | DBP [Bovine adenovirus A]                                       | 4.00E-08  |                                                                |           |
|              |        |               |             | ur                                  | 130       | 6853                                    | AEK98459     | 22K [Titi monkey adenovirus ECC-2011]                           | 1.00E-07  |                                                                |           |
|              |        |               |             | ur                                  | 79        | node_59109                              | ADM46146     | 52.0 kDa protein [Human adenovirus 57]                          | 2.00E-06  |                                                                |           |
|              |        |               |             | ur                                  | 82        | node_52801                              | AEM45095     | hexon [Colobus gureza adenovirus 2]                             | 9.00E-06  |                                                                |           |
|              |        |               |             | ur                                  | 81        | node_366868                             | AAF82136     | hexon protein [bovine adenovirus 10]                            | 3.00E-05  |                                                                |           |
|              |        |               |             | ur                                  | 77        | node_686357                             | ADM46152     | VI minor core 27.0 kDa protein [Human adenovirus 57]            | 3.00E-05  |                                                                |           |
|              |        |               |             | ur                                  | 88        | node_323554                             | YP_004782109 | hexon [Bat adenovirus 2 ]>gi 343201211                          | 8.00E-05  |                                                                |           |
|              |        |               |             | Adenoviridae                        | tblastx   | ur                                      | 262          | 183266                                                          | 1169492   | Human adenovirus type 19 isolate 2000046912 hexon protein gene | 3.00E-26  |
|              |        |               |             |                                     |           | ur                                      | 170          | NODE_15747_length_140_cov_5.421429                              | 1076034   | Porcine adenovirus 5                                           | 1.82E-21  |
|              |        |               |             |                                     |           | ur                                      | 172          | 83216                                                           | 1013555   | Bovine adenovirus type 2                                       | 1.36E-11  |
|              |        |               |             |                                     |           | ur                                      | 101          | NODE_25652_length_71_cov_3.323944                               | 13094054  | Simian adenovirus 50 isolate 18222                             | 1.26E-08  |
|              |        |               |             |                                     |           | ur                                      | 170          | NODE_17174_length_140_cov_3.657143                              | 1013555   | Bovine adenovirus type 2                                       | 8.22E-08  |
|              |        |               |             |                                     |           | ur                                      | 85           | node_327321                                                     | 13931441  | Human adenovirus 61 strain MZ                                  | 4.16E-07  |
|              |        |               |             |                                     |           | ur                                      | 266          | 183731                                                          | 2511954   | Tree shrew adenovirus 1                                        | 9.69E-07  |
|              |        |               |             |                                     |           | ur                                      | 128          | NODE_14287_length_98_cov_3.183673                               | 8481442   | Simian adenovirus 33                                           | 9.75E-07  |
|              |        | ur            | 120         |                                     |           | NODE_16622_length_90_cov_4.255556       | 4817433      | Bovine adenovirus 2 strain 19 hexon gene                        | 2.13E-05  |                                                                |           |
|              |        | ur            | 107         |                                     |           | NODE_31089_length_77_cov_3.454545       | 954795       | Porcine adenovirus serotype 3 complete genome                   | 5.07E-05  |                                                                |           |
|              |        | Herpesviridae | blastn      |                                     |           | th                                      | 2244         | 678372                                                          | BAJ78563  | GP105 [Cavid herpesvirus 2]                                    | 0         |
|              |        |               |             |                                     |           | th                                      | 3437         | 681784                                                          | AEL29769  | hypothetical protein [Bovine herpesvirus 4]                    | 0         |
|              |        |               |             |                                     |           | th                                      | 3437         | 681785                                                          | AEL29769  | hypothetical protein [Bovine herpesvirus 4]                    | 0         |
|              |        |               |             |                                     |           | th                                      | 4195         | 686135                                                          | AEL29788  | hypothetical protein [Bovine herpesvirus 4]                    | 0         |
|              |        |               |             |                                     |           | th                                      | 6318         | 686453                                                          | AEL29808  | hypothetical protein [Bovine herpesvirus 4]                    | 0         |
|              |        |               |             | th                                  | 1748      | 679480                                  | NP_116409    | T55 [Tupaiaid herpesvirus 1]                                    | 3.00E-177 |                                                                |           |
|              |        |               |             | th                                  | 2440      | 686047                                  | AEL29820     | hypothetical protein [Bovine herpesvirus 4]                     | 6.00E-164 |                                                                |           |
|              |        |               |             | th                                  | 1874      | 677912                                  | YP_004933858 | protein UL86 [Cynomolgus macaque cytomegalovirus strain Ottawa] | 2.00E-148 |                                                                |           |
|              |        |               |             | th                                  | 3518      | 680352                                  | CAC84358     | RRlarge [Saimiriine herpesvirus 2]                              | 2.00E-133 |                                                                |           |
|              |        |               |             | th                                  | 1997      | 687887                                  | CAC84320     | monocyte chemotactic protein [Saimiriine herpesvirus 2]         | 4.00E-124 |                                                                |           |
|              |        |               |             | th                                  | 2340      | 677313                                  | NP_076556    | tegument protein [Bovine herpesvirus 4]                         | 2.00E-123 |                                                                |           |
|              |        |               |             | th                                  | 1954      | 679484                                  | NP_116410    | T56 [Tupaiaid herpesvirus 1]                                    | 1.00E-116 |                                                                |           |
|              |        |               |             | th                                  | 5115      | 683236                                  | NP_048040    | hypothetical protein AthV3gp09 [Ateline herpesvirus 3]          | 1.00E-115 |                                                                |           |
|              |        |               |             | th                                  | 1757      | 677723                                  | NP_076552    | ribonucleotide reductase small subunit [Bovine herpesvirus 4]   | 5.00E-109 |                                                                |           |
|              |        |               |             | Herpesviridae                       | blastx    | th                                      | 3226         | 689219                                                          | NP_042636 | glycoprotein M [Equid herpesvirus 2]                           | 2.00E-107 |
|              |        |               |             |                                     |           | th                                      | 2118         | 685062                                                          | AEL29800  | hypothetical protein [Bovine herpesvirus 4]                    | 4.00E-105 |
|              |        |               |             |                                     |           | th                                      | 4234         | 679715                                                          | CAC84324  | terminase [Saimiriine herpesvirus 2]                           | 6.00E-99  |
|              |        |               |             |                                     |           | th                                      | 779          | 683000                                                          | BAJ78545  | GP86 [Cavid herpesvirus 2]                                     | 6.00E-95  |
|              |        |               |             |                                     |           | th                                      | 860          | 682351                                                          | AAO46908  | DNA polymerase [Sus barbatus rhadinovirus 1]                   | 2.00E-93  |
|              |        |               |             |                                     |           | th                                      | 995          | 683867                                                          | NP_076548 | DNA replication protein [Bovine herpesvirus 4]                 | 5.00E-91  |
|              |        | th            | 922         |                                     |           | node714_0_0_16705                       | NP_116454    | T105 [Tupaiaid herpesvirus 1]                                   | 5.00E-89  |                                                                |           |
|              |        | th            | 1962        |                                     |           | 678589                                  | NP_116401    | T48 [Tupaiaid herpesvirus 1]                                    | 2.00E-87  |                                                                |           |
|              |        | th            | 1619        |                                     |           | NODE_32818_length_1589_cov_22.028950    | NP_076509    | capsid protein [Bovine herpesvirus 4]                           | 2.00E-86  |                                                                |           |
|              |        | th            | 725         |                                     |           | node1266_0_0_38731                      | BAI22795     | DNA polymerase [Bat betaherpesvirus 2]                          | 7.00E-85  |                                                                |           |
|              |        | th            | 742         |                                     |           | node1204_0_0_9543                       | NP_042621    | capsid protein [Equid herpesvirus 2]                            | 2.00E-83  |                                                                |           |
|              |        | th            | 863         |                                     |           | NODE_16282_length_833_cov_6.619448      | BAJ78563     | GP105 [Cavid herpesvirus 2]                                     | 2.00E-80  |                                                                |           |
|              |        | th            | 1393        |                                     |           | 680076                                  | NP_116438    | T89 [Tupaiaid herpesvirus 1]                                    | 3.00E-79  |                                                                |           |
|              |        | th            | 1588        |                                     |           | node155_0_0_18189                       | AF083424     | Ateline herpesvirus 3 complete genome                           | 2.00E-78  |                                                                |           |
|              |        | th            | 726         |                                     |           | 683872                                  | NP_116403    | T49 [Tupaiaid herpesvirus 1]                                    | 6.00E-75  |                                                                |           |

|    |      |                                      |              |                                                                                    |          |
|----|------|--------------------------------------|--------------|------------------------------------------------------------------------------------|----------|
| th | 596  | 678193                               | YP_004933858 | protein UL86 [Cynomolgus macaque cytomegalovirus strain Ottawa]                    | 9.00E-75 |
| th | 813  | 683979                               | NP_116454    | T105 [Tupaiaid herpesvirus 1]                                                      | 9.00E-71 |
| th | 876  | NODE_5115_length_846_cov_5.112293    | NP_042658    | ribonucleotide reductase large subunit [Equid herpesvirus 2]                       | 1.00E-70 |
| th | 798  | NODE_6917_length_768_cov_7.893229    | NP_116435    | T86 [Tupaiaid herpesvirus 1]                                                       | 7.00E-70 |
| th | 674  | NODE_17498_length_644_cov_10.413043  | NP_116441    | T92 [Tupaiaid herpesvirus 1]                                                       | 3.00E-68 |
| th | 3523 | 689051                               | CAC84297     | viral phosphoribosylformylglycineamide amidotransferase [Saimiriine herpesvirus 2] | 1.00E-67 |
| th | 1731 | node119_0_0_51097                    | CAC84297     | viral phosphoribosylformylglycineamide amidotransferase [Saimiriine herpesvirus 2] | 1.00E-66 |
| th | 1315 | 687866                               | AAD30086     | DNA polymerase [Human herpesvirus 5]                                               | 2.00E-63 |
| th | 1042 | 666421                               | AAF91253     | UL53 protein [Human herpesvirus 5]                                                 | 7.00E-62 |
| th | 618  | 681260                               | BAI22795     | DNA polymerase [Bat betaherpesvirus 2]                                             | 5.00E-60 |
| th | 742  | 683136                               | YP_068225    | rh134 [Macacine herpesvirus 3]                                                     | 5.00E-59 |
| th | 564  | 686179                               | NP_116410    | T56 [Tupaiaid herpesvirus 1]                                                       | 8.00E-59 |
| th | 551  | NODE_19460_length_521_cov_4.470250   | BAJ78545     | GP86 [Caviid herpesvirus 2]                                                        | 2.00E-58 |
| th | 535  | 686183                               | YP_214109    | Uracil DNA glycosylase homolog [Murid herpesvirus 1]                               | 3.00E-57 |
| th | 1060 | 568612                               | NP_116408    | T54 [Tupaiaid herpesvirus 1]                                                       | 6.00E-56 |
| th | 1320 | 683960                               | NP_076555    | tegument protein [Bovine herpesvirus 4]                                            | 6.00E-56 |
| th | 1098 | 682500                               | NP_076516    | hypothetical protein BoHV4gp22 [Bovine herpesvirus 4]                              | 3.00E-54 |
| th | 514  | 683312                               | NP_076498    | single-stranded DNA-binding protein MDBP [Bovine herpesvirus 4]                    | 3.00E-54 |
| th | 461  | NODE_60118_length_431_cov_3.125290   | YP_214109    | Uracil DNA glycosylase homolog [Murid herpesvirus 1]                               | 1.00E-51 |
| th | 897  | 44494                                | AAA16740     | XILF3 [Human herpesvirus 6]                                                        | 1.00E-50 |
| th | 711  | node1323_0_0_6332                    | NP_076568    | tegument protein/v-FGAM-synthetase [Bovine herpesvirus 4]                          | 1.00E-50 |
| th | 642  | 687662                               | NP_116411    | T57 [Tupaiaid herpesvirus 1]                                                       | 5.00E-50 |
| th | 996  | 661532                               | NP_116451    | T102 [Tupaiaid herpesvirus 1]                                                      | 4.00E-49 |
| th | 1399 | 686518                               | ACZ79906     | tegument protein US22 [Human herpesvirus 5]                                        | 1.00E-48 |
| th | 2409 | 677662                               | AEL29793     | hypothetical protein [Bovine herpesvirus 4]                                        | 1.00E-47 |
| th | 770  | 678371                               | NP_116454    | T105 [Tupaiaid herpesvirus 1]                                                      | 2.00E-47 |
| th | 603  | NODE_23692_length_573_cov_4.874346   | ADB08235     | glycoprotein gB [Macaca mulatta rhadinovirus]                                      | 2.00E-47 |
| th | 440  | NODE_18388_length_410_cov_2.973171   | YP_002321250 | gp57 [Caviid herpesvirus 2]                                                        | 4.00E-47 |
| th | 758  | 687417                               | BAJ78563     | GP105 [Caviid herpesvirus 2]                                                       | 1.00E-46 |
| th | 690  | 682109                               | NP_116438    | T89 [Tupaiaid herpesvirus 1]                                                       | 2.00E-46 |
| th | 373  | NODE_114226_length_343_cov_11.005831 | NP_116435    | T86 [Tupaiaid herpesvirus 1]                                                       | 2.00E-46 |
| th | 851  | 680894                               | CAC84329     | hypothetical protein [Saimiriine herpesvirus 2]                                    | 3.00E-46 |
| th | 2019 | 686737                               | NP_042651    | ORF 54 [Equid herpesvirus 2]                                                       | 2.00E-45 |
| th | 426  | NODE_41701_length_396_cov_2.295455   | NP_116454    | T105 [Tupaiaid herpesvirus 1]                                                      | 3.00E-45 |
| th | 1054 | 138753                               | NP_076498    | single-stranded DNA-binding protein MDBP [Bovine herpesvirus 4]                    | 2.00E-44 |
| th | 680  | NODE_7308_length_650_cov_11.466154   | NP_116466    | T115 [Tupaiaid herpesvirus 1]                                                      | 3.00E-43 |
| th | 349  | NODE_46337_length_319_cov_3.426332   | NP_116410    | T56 [Tupaiaid herpesvirus 1]                                                       | 5.00E-42 |
| th | 681  | 687544                               | BAI22795     | DNA polymerase [Bat betaherpesvirus 2]                                             | 1.00E-41 |
| th | 1968 | 689146                               | YP_438197    | ORF75 [Ovine herpesvirus 2]                                                        | 4.00E-41 |
| th | 879  | 680847                               | NP_040264    | hypothetical protein SaHV2gp27 [Saimiriine herpesvirus 2]                          | 2.00E-39 |
| th | 579  | node1995_0_0_5426                    | NP_042652    | ORF 55 [Equid herpesvirus 2]                                                       | 2.00E-39 |
| th | 346  | 688879                               | ACL51123     | DNA polymerase processivity subunit [Human herpesvirus 5]                          | 3.00E-39 |
| th | 364  | NODE_13608_length_334_cov_7.580838   | NP_076498    | single-stranded DNA-binding protein MDBP [Bovine herpesvirus 4]                    | 8.00E-39 |
| th | 1098 | 688270                               | ACE95384     | anti-apoptotic protein [Muromegalovirus WP15B]                                     | 1.00E-38 |
| th | 488  | 681372                               | NP_612719    | major capsid protein [Panine herpesvirus 2]                                        | 4.00E-38 |
| th | 893  | NODE_43795_length_863_cov_6.502897   | AAA16740     | XILF3 [Human herpesvirus 6]                                                        | 7.00E-38 |
| th | 571  | 680788                               | NP_042617    | thymidine kinase [Equid herpesvirus 2]                                             | 1.00E-37 |
| th | 1373 | NODE_35270_length_1343_cov_3.835443  | NP_064138    | pR33 [Murid herpesvirus 2]                                                         | 1.00E-37 |
| th | 497  | 677195                               | NP_040209    | transport protein [Saimiriine herpesvirus 2]                                       | 3.00E-37 |
| th | 500  | 687705                               | NP_116454    | T105 [Tupaiaid herpesvirus 1]                                                      | 4.00E-37 |
| th | 895  | 678099                               | NP_116332    | T3 [Tupaiaid herpesvirus 1]                                                        | 6.00E-37 |
| th | 1026 | 681252                               | NP_116446    | T98 [Tupaiaid herpesvirus 1]                                                       | 1.00E-36 |
| th | 449  | node3129_0_0_5824                    | YP_068225    | rh134 [Macacine herpesvirus 3]                                                     | 5.00E-36 |
| th | 1311 | 677649                               | NP_116400    | T47 [Tupaiaid herpesvirus 1]                                                       | 6.00E-35 |
| th | 317  | 355724                               | CAC84320     | monocyte chemotactic protein [Saimiriine herpesvirus 2]                            | 7.00E-35 |
| th | 499  | 681186                               | NP_040211    | DNA polymerase [Saimiriine herpesvirus 2]                                          | 8.00E-35 |
| th | 332  | 682203                               | NP_116410    | T56 [Tupaiaid herpesvirus 1]                                                       | 3.00E-34 |
| th | 606  | 51260                                | NP_116406    | T52 [Tupaiaid herpesvirus 1]                                                       | 2.00E-33 |
| th | 1094 | 677703                               | NP_116383    | T33 [Tupaiaid herpesvirus 1]                                                       | 2.00E-33 |
| th | 568  | 686607                               | NP_570766    | capsid protein [Macacine herpesvirus 5]                                            | 1.00E-32 |
| th | 1040 | NODE_20527_length_1010_cov_3.341584  | YP_068194    | rh101 [Macacine herpesvirus 3]                                                     | 1.00E-32 |
| th | 509  | NODE_33248_length_479_cov_3.997912   | NP_042652    | ORF 55 [Equid herpesvirus 2]                                                       | 2.00E-32 |
| th | 295  | NODE_59357_length_265_cov_15.037736  | BAJ78545     | GP86 [Caviid herpesvirus 2]                                                        | 2.00E-32 |
| th | 897  | 683641                               | ADQ57900     | core gene UL25 family protein [Human herpesvirus 8]                                | 6.00E-32 |
| th | 422  | 685272                               | YP_004933874 | protein UL98 [Cynomolgus macaque cytomegalovirus strain Ottawa]                    | 1.00E-31 |
| th | 468  | 677190                               | NP_076515    | hypothetical protein BoHV4gp22 [Bovine herpesvirus 4]                              | 2.00E-31 |
| th | 1122 | 685098                               | NP_116398    | T45 [Tupaiaid herpesvirus 1]                                                       | 2.00E-31 |
| th | 435  | NODE_19119_length_405_cov_10.713580  | ACE95545     | M34 [Muromegalovirus C4A]                                                          | 2.00E-31 |
| th | 289  | NODE_251523_length_259_cov_5.540541  | NP_116411    | T57 [Tupaiaid herpesvirus 1]                                                       | 2.00E-31 |
| th | 740  | 678936                               | NP_612730    | deoxyribonuclease [Panine herpesvirus 2]                                           | 8.00E-31 |
| th | 265  | NODE_29749_length_235_cov_4.697872   | AEL29788     | hypothetical protein [Bovine herpesvirus 4]                                        | 1.00E-30 |
| th | 410  | node3639_0_0_4369                    | BAJ78517     | GP49 [Caviid herpesvirus 2]                                                        | 6.00E-29 |
| th | 335  | 680090                               | NP_064162    | pR56 [Murid herpesvirus 2]                                                         | 1.00E-28 |
| th | 478  | 687947                               | ACE95545     | M34 [Muromegalovirus C4A]                                                          | 1.00E-28 |
| th | 778  | 689163                               | NP_116451    | T102 [Tupaiaid herpesvirus 1]                                                      | 2.00E-28 |
| th | 613  | 622447                               | NP_116405    | T51 [Tupaiaid herpesvirus 1]                                                       | 5.00E-28 |
| th | 312  | 72810                                | NP_116453    | T104 [Tupaiaid herpesvirus 1]                                                      | 6.00E-28 |
| th | 1090 | 682300                               | BAJ78517     | GP49 [Caviid herpesvirus 2]                                                        | 1.00E-27 |
| th | 438  | NODE_119923_length_408_cov_4.044117  | ADB44898     | DNA polymerase [Murid herpesvirus 2]                                               | 1.00E-27 |
| th | 966  | 686125                               | ADY62522     | transport protein [Gorilla gorilla cytomegalovirus 1.1]                            | 5.00E-27 |
| th | 342  | NODE_88271_length_312_cov_3.310897   | YP_004933882 | protein UL105 [Cynomolgus macaque cytomegalovirus strain Ottawa]                   | 7.00E-27 |
| th | 353  | 679585                               | ADB08179     | envelope glycoprotein gB [Human herpesvirus 8]                                     | 3.00E-26 |
| th | 250  | NODE_58872_length_220_cov_3.950000   | AAF81662     | DNA polymerase [Retroperitoneal fibromatosis-associated herpesvirus]               | 6.00E-26 |
| th | 410  | 684108                               | NP_042634    | deoxyribonuclease [Equid herpesvirus 2]                                            | 7.00E-26 |
| th | 694  | 681839                               | NP_047985    | hypothetical protein ATHV3gp09 [Ateline herpesvirus 3]                             | 8.00E-26 |
| th | 311  | NODE_18897_length_281_cov_5.900356   | YP_002321239 | gp46 [Caviid herpesvirus 2]                                                        | 1.00E-25 |
| th | 337  | NODE_269150_length_307_cov_17.671009 | BAJ78517     | GP49 [Caviid herpesvirus 2]                                                        | 2.00E-25 |
| th | 324  | 279176                               | AEL29800     | hypothetical protein [Bovine herpesvirus 4]                                        | 4.00E-25 |
| th | 1008 | 688108                               | NP_597953    | US22 family protein [Tupaiaid herpesvirus 1]                                       | 4.00E-25 |
| th | 243  | NODE_32355_length_213_cov_3.882629   | AAS99982     | JM5 [Macaca fuscata rhadinovirus]                                                  | 5.00E-25 |
| th | 1109 | 687150                               | NP_116405    | T51 [Tupaiaid herpesvirus 1]                                                       | 1.00E-24 |
| th | 260  | NODE_91992_length_230_cov_5.382609   | NP_612730    | deoxyribonuclease [Panine herpesvirus 2]                                           | 1.00E-24 |
| th | 295  | NODE_160328_length_265_cov_5.505661  | YP_002321287 | gp104 [Caviid herpesvirus 2]                                                       | 2.00E-24 |
| th | 634  | 680287                               | NP_064203    | pR103 [Murid herpesvirus 2]                                                        | 3.00E-24 |
| th | 1154 | 683103                               | HQ247788     | Equid herpesvirus 2 strain 276 DNA polymerase gene                                 | 4.00E-24 |
| th | 1000 | node577_0_0_9964                     | HQ247788     | Equid herpesvirus 2 strain 276 DNA polymerase gene                                 | 4.00E-24 |
| th | 410  | 687817                               | NP_116445    | T97 [Tupaiaid herpesvirus 1]                                                       | 6.00E-24 |
| th | 464  | 688610                               | YP_002321239 | gp46 [Caviid herpesvirus 2]                                                        | 6.00E-24 |
| th | 461  | 685646                               | YP_002321259 | gp75 [Caviid herpesvirus 2]                                                        | 2.00E-23 |
| th | 190  | NODE_70912_length_160_cov_5.250000   | NP_116408    | T54 [Tupaiaid herpesvirus 1]                                                       | 2.00E-23 |
| th | 220  | NODE_90821_length_190_cov_8.094737   | AAW55920     | DNA polymerase [Crocidura russula cytomegalovirus 1]                               | 2.00E-23 |
| th | 252  | node8796_0_0_2374                    | ADY62508     | glycoprotein B [Macaca fascicularis cytomegalovirus 1]                             | 3.00E-23 |

|    |      |                                      |              |                                                                             |          |
|----|------|--------------------------------------|--------------|-----------------------------------------------------------------------------|----------|
| th | 258  | node8293_0_0_2339                    | YP_004933870 | protein UL89 [Cynomolgus macaque cytomegalovirus strain Ottawa]             | 4.00E-23 |
| th | 228  | NODE_34782_length_198_cov_4.176768   | ACE95609     | M105 [Muromegalovirus C4A]                                                  | 6.00E-23 |
| th | 1349 | 682563                               | AAO12326     | glycoprotein H [Porcine lymphotropic herpesvirus 3]                         | 2.00E-22 |
| th | 1011 | 687529                               | AEL29776     | hypothetical protein [Bovine herpesvirus 4]                                 | 2.00E-22 |
| th | 1011 | 687530                               | AEL29776     | hypothetical protein [Bovine herpesvirus 4]                                 | 2.00E-22 |
| th | 250  | NODE_35046_length_220_cov_3.677273   | AEL29753     | hypothetical protein [Bovine herpesvirus 4]                                 | 9.00E-22 |
| th | 226  | NODE_108765_length_196_cov_2.193877  | NP_116383    | T33 [Tupaiaid herpesvirus 1]                                                | 2.00E-21 |
| th | 193  | NODE_31781_length_163_cov_5.613497   | NP_064194    | pR89 [Murid herpesvirus 2]                                                  | 5.00E-21 |
| th | 310  | 679814                               | ADV04419     | capsid portal protein [Human herpesvirus 5]                                 | 6.00E-21 |
| th | 256  | 108122                               | NP_116404    | T50 [Tupaiaid herpesvirus 1]                                                | 1.00E-20 |
| th | 330  | 307070                               | NP_597953    | US22 family protein [Tupaiaid herpesvirus 1]                                | 1.00E-20 |
| th | 228  | NODE_59397_length_198_cov_6.191919   | NP_116454    | T105 [Tupaiaid herpesvirus 1]                                               | 1.00E-20 |
| th | 789  | NODE_57090_length_759_cov_4.919631   | AY129399     | Mandrillus cytomegalovirus major DNA binding protein gene                   | 2.00E-20 |
| th | 1136 | 684062                               | NP_116386    | T37 [Tupaiaid herpesvirus 1]                                                | 3.00E-20 |
| th | 340  | NODE_57875_length_310_cov_4.274194   | YP_001129418 | ORF61 [Human herpesvirus 8]                                                 | 3.00E-20 |
| th | 143  | node_1122632                         | FJ538487     | Pan troglodytes cytomegalovirus 2.1 major DNA binding protein gene          | 4.00E-20 |
| th | 661  | NODE_22167_length_631_cov_2.624406   | NP_048044    | v-cyclin [Ateline herpesvirus 3]                                            | 8.00E-20 |
| th | 176  | NODE_40751_length_146_cov_2.205479   | ABU62802     | glycoprotein B [Colobus guereza cytomegalovirus 1.1]                        | 8.00E-20 |
| th | 380  | NODE_182839_length_350_cov_3.768571  | NP_064203    | pR103 [Murid herpesvirus 2]                                                 | 1.00E-19 |
| th | 538  | 688814                               | FJ538487     | Pan troglodytes cytomegalovirus 2.1 major DNA binding protein gene          | 2.00E-19 |
| th | 284  | NODE_228925_length_254_cov_3.055118  | NP_047980    | major ssDNA binding protein [Ateline herpesvirus 3]                         | 2.00E-19 |
| th | 1096 | 679967                               | FJ538487     | Pan troglodytes cytomegalovirus 2.1 major DNA binding protein gene          | 4.00E-19 |
| th | 294  | 687543                               | AAL09158     | DNA polymerase type B [Cercopithecine herpesvirus 3]                        | 4.00E-19 |
| th | 222  | NODE_147943_length_192_cov_11.348958 | BAD08315     | DNA polymerase [unidentified herpesvirus]                                   | 4.00E-19 |
| th | 176  | NODE_162402_length_146_cov_6.356164  | NP_116403    | T49 [Tupaiaid herpesvirus 1]                                                | 4.00E-19 |
| th | 736  | NODE_77308_length_706_cov_4.045326   | ACE95384     | anti-apoptotic protein [Muromegalovirus WP15B]                              | 6.00E-19 |
| th | 137  | 259596                               | YP_002321273 | gp89 [Caviid herpesvirus 2]                                                 | 1.00E-18 |
| th | 1385 | 679708                               | AAD56654     | IL-8 receptor-like G protein coupled receptor homolog [Human herpesvirus 8] | 1.00E-18 |
| th | 219  | NODE_86697_length_189_cov_7.629630   | NP_064162    | pR56 [Murid herpesvirus 2]                                                  | 2.00E-18 |
| th | 312  | NODE_91385_length_282_cov_6.131206   | YP_068233    | rh142 [Macacine herpesvirus 3]                                              | 2.00E-18 |
| th | 217  | NODE_107016_length_187_cov_2.422460  | ACE95603     | M98 [Muromegalovirus C4A]                                                   | 5.00E-18 |
| th | 243  | NODE_130947_length_213_cov_4.492958  | ACE95571     | major DNA-binding protein [Muromegalovirus C4A]                             | 6.00E-18 |
| th | 162  | NODE_79213_length_132_cov_5.462121   | FJ538487     | Pan troglodytes cytomegalovirus 2.1 major DNA binding protein gene          | 8.00E-18 |
| th | 353  | 283888                               | YP_002321239 | gp46 [Caviid herpesvirus 2]                                                 | 1.00E-17 |
| th | 320  | 685175                               | YP_004933810 | tegument protein UL48 [Cynomolgus macaque cytomegalovirus strain Ottawa]    | 2.00E-17 |
| th | 151  | NODE_42608_length_121_cov_3.561984   | YP_004207860 | hypothetical protein RHVP.24 [Rodent herpesvirus Peru]                      | 2.00E-17 |
| th | 166  | node_303469                          | YP_004933874 | protein UL98 [Cynomolgus macaque cytomegalovirus strain Ottawa]             | 3.00E-17 |
| th | 215  | NODE_36297_length_185_cov_24.081081  | BAD08315     | DNA polymerase [unidentified herpesvirus]                                   | 4.00E-17 |
| th | 173  | NODE_21244_length_143_cov_3.377622   | ACY00423     | ORF25 [Human herpesvirus 8]                                                 | 7.00E-17 |
| th | 208  | NODE_38953_length_178_cov_8.157304   | YP_002321287 | gp104 [Caviid herpesvirus 2]                                                | 1.00E-16 |
| th | 282  | 680840                               | YP_002321287 | gp104 [Caviid herpesvirus 2]                                                | 3.00E-16 |
| th | 436  | 684075                               | NP_116398    | T45 [Tupaiaid herpesvirus 1]                                                | 3.00E-16 |
| th | 193  | node_282983                          | NP_076498    | single-stranded DNA-binding protein MDBP [Bovine herpesvirus 4]             | 3.00E-16 |
| th | 688  | NODE_63276_length_658_cov_3.969605   | NP_597953    | US22 family protein [Tupaiaid herpesvirus 1]                                | 3.00E-16 |
| th | 202  | NODE_114115_length_172_cov_9.273255  | AAM89282     | DNA polymerase [Mandrillus cytomegalovirus]                                 | 4.00E-16 |
| th | 526  | 677133                               | NP_076498    | single-stranded DNA-binding protein MDBP [Bovine herpesvirus 4]             | 6.00E-16 |
| th | 275  | NODE_108245_length_245_cov_4.004082  | NP_048044    | v-cyclin [Ateline herpesvirus 3]                                            | 7.00E-16 |
| th | 137  | node_182212                          | AAL09158     | DNA polymerase type B [Cercopithecine herpesvirus 3]                        | 7.00E-16 |
| th | 221  | node_88222                           | ADE88080     | tegument protein UL88 [Human herpesvirus 5]                                 | 8.00E-16 |
| th | 290  | 682419                               | NP_116445    | T97 [Tupaiaid herpesvirus 1]                                                | 1.00E-15 |
| th | 276  | node7229_0_0_3130                    | AC280400     | tegument protein US22 [Human herpesvirus 5]                                 | 1.00E-15 |
| th | 467  | 497068                               | NP_042987    | protein U94/rep [Human herpesvirus 6]                                       | 2.00E-15 |
| th | 1083 | 513505                               | BAJ78515     | GP48 [Caviid herpesvirus 2]                                                 | 2.00E-15 |
| th | 874  | 678186                               | YP_002321299 | GP105 [Caviid herpesvirus 2]                                                | 2.00E-15 |
| th | 168  | NODE_13239_length_138_cov_2.188406   | NP_064159    | pR53 [Murid herpesvirus 2]                                                  | 2.00E-15 |
| th | 1080 | NODE_86952_length_1050_cov_7.276190  | BAJ78515     | GP48 [Caviid herpesvirus 2]                                                 | 2.00E-15 |
| th | 107  | node_213761                          | AB592928     | Caviid herpesvirus 2 DNA                                                    | 3.00E-15 |
| th | 244  | 252381                               | AAO12279     | major DNA binding protein [Porcine lymphotropic herpesvirus 2]              | 3.00E-15 |
| th | 247  | 476369                               | BAI22795     | DNA polymerase [Bat betaherpesvirus 2]                                      | 3.00E-15 |
| th | 278  | NODE_118209_length_248_cov_3.302419  | NP_048003    | hypothetical protein ATHV3gp09 [Ateline herpesvirus 3]                      | 4.00E-15 |
| th | 214  | NODE_43177_length_184_cov_2.782609   | NP_116404    | T50 [Tupaiaid herpesvirus 1]                                                | 6.00E-15 |
| th | 280  | 687303                               | YP_002321250 | gp57 [Caviid herpesvirus 2]                                                 | 1.00E-14 |
| th | 216  | NODE_3248_length_186_cov_5.091398    | ACE95592     | M87 [Muromegalovirus C4A]                                                   | 1.00E-14 |
| th | 195  | NODE_67168_length_165_cov_5.969697   | NP_116411    | T57 [Tupaiaid herpesvirus 1]                                                | 1.00E-14 |
| th | 268  | 12678                                | NP_042617    | thymidine kinase [Equid herpesvirus 2]                                      | 2.00E-14 |
| th | 316  | 677286                               | NP_076498    | single-stranded DNA-binding protein MDBP [Bovine herpesvirus 4]             | 2.00E-14 |
| th | 679  | 688719                               | NP_612691    | large tegument protein [Panine herpesvirus 2]                               | 2.00E-14 |
| th | 328  | NODE_23148_length_298_cov_4.120805   | YP_002321254 | gp70 [Caviid herpesvirus 2]                                                 | 2.00E-14 |
| th | 407  | node3680_0_0_6245                    | NP_042628    | ORF 32 [Equid herpesvirus 2]                                                | 2.00E-14 |
| th | 172  | 26922                                | BAJ78517     | GP49 [Caviid herpesvirus 2]                                                 | 3.00E-14 |
| th | 425  | 678657                               | NP_116454    | T105 [Tupaiaid herpesvirus 1]                                               | 3.00E-14 |
| th | 680  | 681725                               | Q69545       | RecName: Full=Uncharacterized protein L1 [Human herpesvirus 6]              | 3.00E-14 |
| th | 287  | NODE_41986_length_257_cov_3.813230   | CAC84324     | terminase [Saimiriine herpesvirus 2]                                        | 3.00E-14 |
| th | 219  | NODE_50537_length_189_cov_6.978836   | YP_004933840 | glycoprotein UL75 [Cynomolgus macaque cytomegalovirus strain Ottawa]        | 3.00E-14 |
| th | 179  | NODE_119175_length_149_cov_6.228188  | ABO40779     | DNA polymerase [Apodemus flavicollis cytomegalovirus 2]                     | 4.00E-14 |
| th | 300  | 283368                               | ACE95384     | anti-apoptotic protein [Muromegalovirus WP15B]                              | 5.00E-14 |
| th | 157  | NODE_75062_length_127_cov_11.291339  | ACE95406     | M56 [Muromegalovirus WP15B]                                                 | 5.00E-14 |
| th | 616  | NODE_84494_length_586_cov_4.392491   | NP_597953    | US22 family protein [Tupaiaid herpesvirus 1]                                | 6.00E-14 |
| th | 1004 | 686336                               | BAJ78496     | GP29 [Caviid herpesvirus 2]                                                 | 8.00E-14 |
| th | 1107 | NODE_10610_length_1077_cov_6.493965  | NP_116337    | t8 [Tupaiaid herpesvirus 1]                                                 | 1.00E-13 |
| th | 155  | node_13741                           | NP_116454    | T105 [Tupaiaid herpesvirus 1]                                               | 1.00E-13 |
| th | 160  | NODE_62555_length_130_cov_3.161538   | FJ483969     | Cercopithecine herpesvirus 5 strain Colburn                                 | 2.00E-13 |
| th | 260  | 112651                               | NP_048029    | hypothetical protein ATHV3gp09 [Ateline herpesvirus 3]                      | 2.00E-13 |
| th | 383  | NODE_16096_length_353_cov_6.087819   | NP_116330    | T1 [Tupaiaid herpesvirus 1]                                                 | 2.00E-13 |
| th | 589  | 678402                               | NP_116331    | T2 [Tupaiaid herpesvirus 1]                                                 | 3.00E-13 |
| th | 357  | NODE_13833_length_327_cov_3.669725   | NP_116401    | T48 [Tupaiaid herpesvirus 1]                                                | 3.00E-13 |
| th | 768  | NODE_21643_length_738_cov_3.233062   | NP_064238    | pr127 [Murid herpesvirus 2]                                                 | 3.00E-13 |
| th | 362  | NODE_44325_length_332_cov_4.759036   | NP_040258    | hypothetical protein SaHV2gp27 [Saimiriine herpesvirus 2]                   | 3.00E-13 |
| th | 318  | NODE_12724_length_288_cov_9.059028   | YP_002321239 | gp46 [Caviid herpesvirus 2]                                                 | 4.00E-13 |
| th | 185  | NODE_24134_length_155_cov_5.341936   | ADV04420     | helicase-primase helicase subunit [Human herpesvirus 5]                     | 4.00E-13 |
| th | 177  | node_430262                          | ADV04403     | major capsid protein [Human herpesvirus 5]                                  | 4.00E-13 |
| th | 470  | NODE_73750_length_440_cov_7.781818   | ACT81830     | tegument protein US22 [Human herpesvirus 5]                                 | 5.00E-13 |
| th | 122  | 76604                                | NP_116436    | T87 [Tupaiaid herpesvirus 1]                                                | 6.00E-13 |
| th | 189  | 572862                               | ADE88080     | tegument protein UL88 [Human herpesvirus 5]                                 | 1.00E-12 |
| th | 717  | 678267                               | NP_116467    | t116 [Tupaiaid herpesvirus 1]                                               | 2.00E-12 |
| th | 209  | NODE_158061_length_179_cov_10.614525 | NP_116400    | T47 [Tupaiaid herpesvirus 1]                                                | 2.00E-12 |
| th | 127  | NODE_191911_length_97_cov_3.752577   | YP_002321250 | gp57 [Caviid herpesvirus 2]                                                 | 2.00E-12 |
| th | 137  | node_308582                          | NP_116454    | T105 [Tupaiaid herpesvirus 1]                                               | 2.00E-12 |
| th | 426  | NODE_44525_length_396_cov_8.376263   | BAJ78515     | GP48 [Caviid herpesvirus 2]                                                 | 2.00E-12 |
| th | 405  | NODE_5451_length_375_cov_5.488000    | YP_004933862 | tegument protein UL88 [Cynomolgus macaque cytomegalovirus strain Ottawa]    | 2.00E-12 |
| th | 249  | NODE_62550_length_219_cov_3.086758   | NP_116423    | T73 [Tupaiaid herpesvirus 1]                                                | 2.00E-12 |
| th | 408  | node3677_0_0_2771                    | YP_004933862 | tegument protein UL88 [Cynomolgus macaque cytomegalovirus strain Ottawa]    | 2.00E-12 |

|    |      |                                     |              |                                                                  |          |
|----|------|-------------------------------------|--------------|------------------------------------------------------------------|----------|
| th | 148  | NODE_119144_length_118_cov_2.076271 | AEL29768     | hypothetical protein [Bovine herpesvirus 4]                      | 3.00E-12 |
| th | 165  | NODE_20732_length_135_cov_2.044445  | NP_047980    | major ssDNA binding protein [Ateline herpesvirus 3]              | 4.00E-12 |
| th | 132  | 143595                              | ACY71883     | DNA polymerase [Equid herpesvirus 5]                             | 5.00E-12 |
| th | 403  | 472553                              | ACY00466     | ORF63 [Human herpesvirus 8]                                      | 7.00E-12 |
| th | 176  | NODE_65023_length_146_cov_4.849315  | ACY00455     | ORF56 [Human herpesvirus 8]                                      | 8.00E-12 |
| th | 196  | NODE_102601_length_166_cov_4.451807 | NP_042617    | thymidine kinase [Equid herpesvirus 2]                           | 1.00E-11 |
| th | 169  | NODE_63817_length_139_cov_4.179856  | BAJ78563     | GP105 [Caviid herpesvirus 2]                                     | 1.00E-11 |
| th | 162  | 282758                              | NP_612730    | deoxyribonuclease [Panine herpesvirus 2]                         | 2.00E-11 |
| th | 162  | NODE_223588_length_132_cov_3.371212 | ACB69202     | glycoprotein B [Sus barbatus rhadinovirus 1]                     | 2.00E-11 |
| th | 147  | node_556557                         | ACT68393     | glycoprotein B [Gorilla gorilla cytomegalovirus 1.1]             | 2.00E-11 |
| th | 216  | node_82169                          | NP_065553    | deoxyuridine triphosphatase [Alcelaphine herpesvirus 1]          | 2.00E-11 |
| th | 474  | 680083                              | NP_116433    | T84 [Tupaiaid herpesvirus 1]                                     | 3.00E-11 |
| th | 167  | NODE_11552_length_137_cov_6.051095  | ACE95568     | DNA polymerase [Muromegalovirus C4A]                             | 3.00E-11 |
| th | 127  | NODE_74896_length_97_cov_5.639175   | ADV04385     | single-stranded DNA-binding protein [Human herpesvirus 5]        | 3.00E-11 |
| th | 182  | NODE_90322_length_152_cov_2.118421  | NP_047996    | major capsid protein [Ateline herpesvirus 3]                     | 3.00E-11 |
| th | 229  | node10617_0_0_1954                  | CAC84304     | polmerase [Saimiriine herpesvirus 2]                             | 3.00E-11 |
| th | 310  | 685795                              | NP_116379    | T30 [Tupaiaid herpesvirus 1]                                     | 4.00E-11 |
| th | 119  | 453076                              | AAM89279     | DNA polymerase [Pongo pygmaeus cytomegalovirus 1]                | 7.00E-11 |
| th | 472  | 677586                              | NP_116330    | T1 [Tupaiaid herpesvirus 1]                                      | 7.00E-11 |
| th | 144  | NODE_152665_length_114_cov_2.622807 | NP_570766    | capsid protein [Macacine herpesvirus 5]                          | 7.00E-11 |
| th | 102  | node_446343                         | ACE95266     | M89 [Muromegalovirus G4]                                         | 7.00E-11 |
| th | 116  | node_49999                          | AEL29768     | hypothetical protein [Bovine herpesvirus 4]                      | 7.00E-11 |
| th | 830  | NODE_43772_length_800_cov_8.417500  | NP_116375    | T29 [Tupaiaid herpesvirus 1]                                     | 8.00E-11 |
| th | 167  | 178320                              | AEI91957     | putative capsid protein [Porcine cytomegalovirus]                | 9.00E-11 |
| th | 202  | NODE_13887_length_172_cov_4.290698  | AAO12325     | thymidine kinase [Porcine lymphotropic herpesvirus 3]            | 9.00E-11 |
| th | 847  | 682028                              | NP_116445    | T97 [Tupaiaid herpesvirus 1]                                     | 1.00E-10 |
| th | 149  | NODE_10588_length_119_cov_2.663866  | NP_042949    | capsid triplex subunit 2 [Human herpesvirus 6]                   | 1.00E-10 |
| th | 137  | 259595                              | YP_002321273 | gp89 [Caviid herpesvirus 2]                                      | 2.00E-10 |
| th | 133  | node_311731                         | NP_042621    | capsid protein [Equid herpesvirus 2]                             | 2.00E-10 |
| th | 106  | NODE_55739_length_76_cov_4.828948   | YP_002321273 | gp89 [Caviid herpesvirus 2]                                      | 2.00E-10 |
| th | 654  | node1570_0_0_5747                   | NP_116334    | T5 [Tupaiaid herpesvirus 1]                                      | 2.00E-10 |
| th | 117  | 486438                              | ADV04385     | single-stranded DNA-binding protein [Human herpesvirus 5]        | 3.00E-10 |
| th | 258  | NODE_59862_length_228_cov_2.587719  | NP_064186    | pR87 [Murid herpesvirus 2]                                       | 3.00E-10 |
| th | 405  | NODE_39780_length_375_cov_4.170667  | AB592928     | Caviid herpesvirus 2 DNA                                         | 4.00E-10 |
| th | 179  | 37656                               | NP_050252    | origin binding protein [Human herpesvirus 6]                     | 4.00E-10 |
| th | 113  | NODE_93192_length_83_cov_4.421687   | CAC84339     | helicase [Saimiriine herpesvirus 2]                              | 4.00E-10 |
| th | 178  | 10145                               | YP_002321271 | gp87 [Caviid herpesvirus 2]                                      | 5.00E-10 |
| th | 138  | NODE_120645_length_108_cov_2.351852 | AAA16740     | XILF3 [Human herpesvirus 6]                                      | 5.00E-10 |
| th | 150  | NODE_48909_length_120_cov_6.541667  | ADY62505     | glycoprotein B [Mandrillus cytomegalovirus]                      | 5.00E-10 |
| th | 128  | NODE_53012_length_98_cov_4.193878   | AAO12282     | DNA polymerase [Porcine lymphotropic herpesvirus 2]              | 5.00E-10 |
| th | 149  | NODE_190995_length_119_cov_5.176471 | YP_073773    | protein UL49 [Human herpesvirus 7]                               | 6.00E-10 |
| th | 166  | NODE_95578_length_136_cov_5.345588  | NP_116443    | T94 [Tupaiaid herpesvirus 1]                                     | 6.00E-10 |
| th | 607  | node1799_0_0_4393                   | BAJ78495     | GP28.1 [Caviid herpesvirus 2]                                    | 6.00E-10 |
| th | 127  | NODE_101875_length_97_cov_2.876289  | AAF60007     | packaging protein [Rhesus monkey rhadinovirus H26-95]            | 8.00E-10 |
| th | 130  | node_358925                         | YP_004933826 | protein UL57 [Cynomolgus macaque cytomegalovirus strain Ottawa]  | 8.00E-10 |
| th | 306  | NODE_91359_length_276_cov_5.036232  | NP_040266    | hypothetical protein SaHV2gp27 [Saimiriine herpesvirus 2]        | 8.00E-10 |
| th | 326  | node5426_0_0_2856                   | NP_116374    | t28.2 [Tupaiaid herpesvirus 1]                                   | 8.00E-10 |
| th | 95   | node_110945                         | AB592928     | Caviid herpesvirus 2 DNA                                         | 9.00E-10 |
| th | 171  | 306305                              | NP_042661    | tegument protein [Equid herpesvirus 2]                           | 1.00E-09 |
| th | 653  | 678933                              | NP_116374    | t28.2 [Tupaiaid herpesvirus 1]                                   | 1.00E-09 |
| th | 445  | 681749                              | BAA78228     | U8 [Human herpesvirus 6B]                                        | 1.00E-09 |
| th | 354  | 686243                              | ADE88046     | protein UL38 [Human herpesvirus 5]                               | 1.00E-09 |
| th | 120  | NODE_36510_length_90_cov_3.000000   | ABO40787     | DNA polymerase [Rattus exulans cytomegalovirus 1]                | 1.00E-09 |
| th | 179  | NODE_38619_length_149_cov_4.677852  | NP_076529    | alkaline exonuclease [Bovine herpesvirus 4]                      | 1.00E-09 |
| th | 183  | NODE_88270_length_153_cov_4.653595  | NP_116454    | T105 [Tupaiaid herpesvirus 1]                                    | 1.00E-09 |
| th | 141  | NODE_88777_length_111_cov_5.225225  | BAI22795     | DNA polymerase [Bat betaherpesvirus 2]                           | 1.00E-09 |
| th | 195  | 130407                              | NP_116384    | T34 [Tupaiaid herpesvirus 1]                                     | 2.00E-09 |
| th | 349  | 677148                              | NP_076525    | hypothetical protein BoHV4gp22 [Bovine herpesvirus 4]            | 2.00E-09 |
| th | 186  | NODE_106371_length_156_cov_2.057692 | NP_050223    | transactivator [Human herpesvirus 6]                             | 2.00E-09 |
| th | 179  | NODE_140828_length_149_cov_2.362416 | YP_068292    | rh204 [Macacine herpesvirus 3]                                   | 2.00E-09 |
| th | 186  | node_383088                         | ADY62519     | DNA polymerase [Gorilla gorilla cytomegalovirus 2.1]             | 2.00E-09 |
| th | 132  | NODE_59228_length_102_cov_9.774509  | ACE95557     | DNA-binding protein [Muromegalovirus C4A]                        | 2.00E-09 |
| th | 781  | node_74353                          | Q69545       | RecName: Full=Uncharacterized protein L1 [Human herpesvirus 6]   | 2.00E-09 |
| th | 200  | NODE_118446_length_170_cov_2.800000 | CAC84355     | hypothetical protein [Saimiriine herpesvirus 2]                  | 3.00E-09 |
| th | 194  | NODE_140870_length_164_cov_2.378049 | CAC84352     | primase [Saimiriine herpesvirus 2]                               | 3.00E-09 |
| th | 136  | NODE_141156_length_106_cov_8.330189 | NP_065555    | primase [Alcelaphine herpesvirus 1]                              | 3.00E-09 |
| th | 115  | NODE_158035_length_85_cov_3.870588  | ACE95609     | M105 [Muromegalovirus C4A]                                       | 3.00E-09 |
| th | 118  | NODE_128479_length_88_cov_3.454545  | NP_116438    | T89 [Tupaiaid herpesvirus 1]                                     | 4.00E-09 |
| th | 120  | node_174159                         | CAC84324     | terminase [Saimiriine herpesvirus 2]                             | 4.00E-09 |
| th | 121  | node_68399                          | YP_004933881 | protein UL104 [Cynomolgus macaque cytomegalovirus strain Ottawa] | 4.00E-09 |
| th | 159  | 258493                              | NP_040209    | transport protein [Saimiriine herpesvirus 2]                     | 5.00E-09 |
| th | 141  | node_202400                         | ACE95406     | M56 [Muromegalovirus WP15B]                                      | 5.00E-09 |
| th | 898  | NODE_13506_length_868_cov_6.647465  | YP_002321299 | GP105 [Caviid herpesvirus 2]                                     | 7.00E-09 |
| th | 155  | NODE_17530_length_125_cov_2.504000  | NP_116446    | T98 [Tupaiaid herpesvirus 1]                                     | 7.00E-09 |
| th | 90   | node_473077                         | NP_042620    | ORF 24 [Equid herpesvirus 2]                                     | 7.00E-09 |
| th | 97   | node_9173                           | NP_116454    | T105 [Tupaiaid herpesvirus 1]                                    | 7.00E-09 |
| th | 320  | 685463                              | NP_612730    | deoxyribonuclease [Panine herpesvirus 2]                         | 9.00E-09 |
| th | 579  | 685815                              | YP_073809    | tegument serine/threonine protein kinase [Human herpesvirus 7]   | 9.00E-09 |
| th | 147  | NODE_10589_length_117_cov_2.384615  | AEI91957     | putative capsid protein [Porcine cytomegalovirus]                | 9.00E-09 |
| th | 106  | 149741                              | YP_004207860 | hypothetical protein RHVP.24 [Rodent herpesvirus Peru]           | 1.00E-08 |
| th | 848  | 678162                              | ADQ57884     | ORF10 protein [Human herpesvirus 8]                              | 1.00E-08 |
| th | 119  | NODE_120282_length_89_cov_2.752809  | CAC84304     | polmerase [Saimiriine herpesvirus 2]                             | 1.00E-08 |
| th | 102  | NODE_55445_length_72_cov_3.027778   | NP_116411    | T57 [Tupaiaid herpesvirus 1]                                     | 1.00E-08 |
| th | 569  | node2049_0_0_4156                   | NP_612687    | DNA polymerase processivity subunit [Panine herpesvirus 2]       | 1.00E-08 |
| th | 160  | 1921                                | NP_116411    | T57 [Tupaiaid herpesvirus 1]                                     | 2.00E-08 |
| th | 126  | 419834                              | ACB55590     | glycoprotein B [Babryousa babryussa rhadinovirus 1]              | 2.00E-08 |
| th | 457  | 680838                              | NP_570809    | large ribonucleotide reductase [Macacine herpesvirus 5]          | 2.00E-08 |
| th | 536  | 683416                              | NP_042645    | glycoprotein L [Equid herpesvirus 2]                             | 2.00E-08 |
| th | 118  | node_216060                         | AEL29788     | hypothetical protein [Bovine herpesvirus 4]                      | 2.00E-08 |
| th | 113  | NODE_82215_length_83_cov_3.506024   | NP_076498    | single-stranded DNA-binding protein MDBP [Bovine herpesvirus 4]  | 2.00E-08 |
| th | 368  | node4372_12_0_10580                 | Q69545       | RecName: Full=Uncharacterized protein L1 [Human herpesvirus 6]   | 2.00E-08 |
| th | 110  | 309270                              | ADV04385     | single-stranded DNA-binding protein [Human herpesvirus 5]        | 3.00E-08 |
| th | 184  | NODE_104451_length_154_cov_5.993506 | YP_002321242 | gp49 [Caviid herpesvirus 2]                                      | 3.00E-08 |
| th | 159  | node_291527                         | ADV04414     | deoxyribonuclease [Human herpesvirus 5]                          | 3.00E-08 |
| th | 203  | NODE_36627_length_173_cov_3.456647  | NP_116379    | T30 [Tupaiaid herpesvirus 1]                                     | 3.00E-08 |
| th | 234  | NODE_6292_length_204_cov_16.372549  | AF281817     | Tupaia herpesvirus strain 2                                      | 4.00E-08 |
| th | 149  | NODE_139046_length_119_cov_2.949580 | ACE95571     | major DNA-binding protein [Muromegalovirus C4A]                  | 4.00E-08 |
| th | 304  | NODE_3656_length_274_cov_2.605839   | NP_064154    | pR48 [Murid herpesvirus 2]                                       | 4.00E-08 |
| th | 145  | NODE_99447_length_115_cov_8.791305  | NP_116334    | T5 [Tupaiaid herpesvirus 1]                                      | 4.00E-08 |
| th | 751  | 684529                              | YP_004933812 | protein UL48a [Cynomolgus macaque cytomegalovirus strain Ottawa] | 5.00E-08 |
| th | 1155 | 688409                              | NP_116398    | T45 [Tupaiaid herpesvirus 1]                                     | 5.00E-08 |
| th | 160  | node_109711                         | ACY00423     | ORF25 [Human herpesvirus 8]                                      | 6.00E-08 |

|    |      |                                     |              |                                                                          |          |
|----|------|-------------------------------------|--------------|--------------------------------------------------------------------------|----------|
| th | 121  | node_292245                         | YP_002321239 | gp46 [Caviid herpesvirus 2]                                              | 6.00E-08 |
| th | 150  | NODE_31113_length_120_cov_5.450000  | 2W4B_A       | Chain A                                                                  | 6.00E-08 |
| th | 203  | NODE_11526_length_173_cov_3.560694  | NP_064141    | pR36 [Murid herpesvirus 2]                                               | 7.00E-08 |
| th | 140  | NODE_42489_length_110_cov_3.100000  | NP_733870    | ORF17 [Callitrichine herpesvirus 3]                                      | 7.00E-08 |
| th | 174  | NODE_61871_length_144_cov_3.625000  | NP_042658    | ribonucleotide reductase large subunit [Equid herpesvirus 2]             | 7.00E-08 |
| th | 253  | NODE_13989_length_223_cov_3.757848  | AEL29801     | hypothetical protein [Bovine herpesvirus 4]                              | 8.00E-08 |
| th | 108  | node_35382                          | ADV04403     | major capsid protein [Human herpesvirus 5]                               | 8.00E-08 |
| th | 95   | NODE_102674_length_65_cov_5.892308  | YP_004933882 | protein UL105 [Cynomolgus macaque cytomegalovirus strain Ottawa]         | 1.00E-07 |
| th | 348  | NODE_42066_length_318_cov_6.679245  | NP_116454    | T105 [Tupaiaid herpesvirus 1]                                            | 1.00E-07 |
| th | 143  | node_62341                          | NP_076525    | hypothetical protein BoHV4gp22 [Bovine herpesvirus 4]                    | 1.00E-07 |
| th | 174  | node_77803                          | NP_116385    | T35 [Tupaiaid herpesvirus 1]                                             | 1.00E-07 |
| th | 119  | node_79685                          | YP_004933882 | protein UL105 [Cynomolgus macaque cytomegalovirus strain Ottawa]         | 1.00E-07 |
| th | 321  | 171142                              | ADZ99565     | glycoprotein H [Equid herpesvirus 2]                                     | 2.00E-07 |
| th | 525  | 683601                              | BAJ78515     | GP48 [Caviid herpesvirus 2]                                              | 2.00E-07 |
| th | 88   | node_108382                         | ABH05841     | DNA polymerase [Eptesicus serotinus rhadinovirus 1]                      | 2.00E-07 |
| th | 123  | NODE_139238_length_93_cov_2.763441  | BAJ78545     | GP86 [Caviid herpesvirus 2]                                              | 2.00E-07 |
| th | 98   | node_1573363                        | CAC84358     | RRlarge [Saimiriine herpesvirus 2]                                       | 2.00E-07 |
| th | 100  | node_585250                         | BAJ78517     | GP49 [Caviid herpesvirus 2]                                              | 2.00E-07 |
| th | 184  | NODE_72986_length_154_cov_11.012987 | NP_116384    | T34 [Tupaiaid herpesvirus 1]                                             | 2.00E-07 |
| th | 299  | node6213_0_0_2490                   | NP_597953    | US22 family protein [Tupaiaid herpesvirus 1]                             | 2.00E-07 |
| th | 145  | NODE_11175_length_115_cov_2.000000  | AF327830     | Bovine lymphotropic herpesvirus DNA polymerase (DPOL) gene               | 3.00E-07 |
| th | 97   | node_162944                         | BAJ78563     | GP105 [Caviid herpesvirus 2]                                             | 3.00E-07 |
| th | 191  | NODE_43415_length_161_cov_4.310559  | AEL29807     | hypothetical protein [Bovine herpesvirus 4]                              | 3.00E-07 |
| th | 356  | 680432                              | ADE88080     | tegument protein UL88 [Human herpesvirus 5]                              | 4.00E-07 |
| th | 330  | NODE_63202_length_300_cov_3.433333  | NP_047993    | glycoprotein H [Ateline herpesvirus 3]                                   | 4.00E-07 |
| th | 194  | 165928                              | YP_004933814 | protein UL49 [Cynomolgus macaque cytomegalovirus strain Ottawa]          | 5.00E-07 |
| th | 314  | 678605                              | BAJ78552     | GP94 [Caviid herpesvirus 2]                                              | 5.00E-07 |
| th | 140  | node_12407                          | CAC84337     | hypothetical protein [Saimiriine herpesvirus 2]                          | 5.00E-07 |
| th | 984  | 478975                              | NP_064151    | pR45 [Murid herpesvirus 2]                                               | 6.00E-07 |
| th | 146  | NODE_215611_length_116_cov_5.646552 | BAJ78545     | GP86 [Caviid herpesvirus 2]                                              | 6.00E-07 |
| th | 103  | node_346418                         | ACT68393     | glycoprotein B [Gorilla gorilla cytomegalovirus 1.1]                     | 6.00E-07 |
| th | 131  | node_8569                           | NP_116453    | T104 [Tupaiaid herpesvirus 1]                                            | 6.00E-07 |
| th | 98   | node_919025                         | AAM89282     | DNA polymerase [Mandrillus cytomegalovirus]                              | 6.00E-07 |
| th | 133  | 332968                              | NP_064199    | pR98 [Murid herpesvirus 2]                                               | 8.00E-07 |
| th | 477  | 681741                              | NP_048030    | hypothetical protein AthV3gp09 [Ateline herpesvirus 3]                   | 8.00E-07 |
| th | 226  | 686012                              | NP_116403    | T49 [Tupaiaid herpesvirus 1]                                             | 8.00E-07 |
| th | 87   | node_1178673                        | YP_004933858 | protein UL86 [Cynomolgus macaque cytomegalovirus strain Ottawa]          | 8.00E-07 |
| th | 91   | node_213762                         | NP_116411    | T57 [Tupaiaid herpesvirus 1]                                             | 8.00E-07 |
| th | 238  | NODE_45584_length_208_cov_2.552885  | NP_612795    | tegument protein US22 [Panine herpesvirus 2]                             | 8.00E-07 |
| th | 124  | 155207                              | NP_116410    | T56 [Tupaiaid herpesvirus 1]                                             | 1.00E-06 |
| th | 127  | NODE_196015_length_97_cov_2.298969  | AEL29808     | hypothetical protein [Bovine herpesvirus 4]                              | 1.00E-06 |
| th | 114  | node_380625                         | NP_065560    | ribonucleotide-reductase                                                 | 1.00E-06 |
| th | 158  | NODE_71805_length_128_cov_3.484375  | NP_116374    | t28.2 [Tupaiaid herpesvirus 1]                                           | 1.00E-06 |
| th | 193  | 435852                              | NP_116387    | T38 [Tupaiaid herpesvirus 1]                                             | 2.00E-06 |
| th | 106  | NODE_112372_length_76_cov_7.421052  | YP_004933858 | protein UL86 [Cynomolgus macaque cytomegalovirus strain Ottawa]          | 2.00E-06 |
| th | 82   | node_1606468                        | ACY71885     | DNA terminase [Equid herpesvirus 5]                                      | 2.00E-06 |
| th | 87   | node_309649                         | NP_116438    | T89 [Tupaiaid herpesvirus 1]                                             | 2.00E-06 |
| th | 131  | NODE_45555_length_101_cov_3.049505  | YP_004933871 | protein UL95 [Cynomolgus macaque cytomegalovirus strain Ottawa]          | 2.00E-06 |
| th | 90   | node_476606                         | ACY82599     | DNA polymerase [Egyptian fruit bat gammaherpesvirus]                     | 2.00E-06 |
| th | 228  | NODE_75238_length_198_cov_3.803030  | NP_116403    | T49 [Tupaiaid herpesvirus 1]                                             | 2.00E-06 |
| th | 109  | node_83459                          | NP_116411    | T57 [Tupaiaid herpesvirus 1]                                             | 2.00E-06 |
| th | 778  | 682679                              | ACE95558     | ribonucleotide reductase [Muromegalovirus C4A]                           | 3.00E-06 |
| th | 994  | 683758                              | AAG01636     | Orf73 [Human herpesvirus 8]                                              | 3.00E-06 |
| th | 110  | NODE_119454_length_80_cov_3.087500  | AAK28844     | DNA polymerase [Ovine herpesvirus 2]                                     | 3.00E-06 |
| th | 81   | node_1376838                        | NP_116406    | T52 [Tupaiaid herpesvirus 1]                                             | 3.00E-06 |
| th | 297  | NODE_31492_length_267_cov_3.861423  | NP_064239    | pR128 [Murid herpesvirus 2]                                              | 3.00E-06 |
| th | 154  | NODE_40956_length_124_cov_2.596774  | NP_065526    | ORF27 [Alcelaphine herpesvirus 1]                                        | 3.00E-06 |
| th | 126  | node_111848                         | NP_064203    | pR103 [Murid herpesvirus 2]                                              | 4.00E-06 |
| th | 96   | node_1388298                        | ACE95609     | M105 [Muromegalovirus C4A]                                               | 4.00E-06 |
| th | 88   | node_484987                         | NP_116454    | T105 [Tupaiaid herpesvirus 1]                                            | 4.00E-06 |
| th | 95   | 440132                              | AEL29763     | hypothetical protein [Bovine herpesvirus 4]                              | 5.00E-06 |
| th | 84   | node_1321217                        | NP_116438    | T89 [Tupaiaid herpesvirus 1]                                             | 5.00E-06 |
| th | 373  | NODE_16171_length_343_cov_8.166181  | YP_004933802 | tegument protein UL43 [Cynomolgus macaque cytomegalovirus strain Ottawa] | 5.00E-06 |
| th | 125  | node_73349                          | NP_064162    | pR56 [Murid herpesvirus 2]                                               | 5.00E-06 |
| th | 124  | NODE_74117_length_94_cov_4.957447   | YP_073806    | tegument protein UL16 [Human herpesvirus 7]                              | 5.00E-06 |
| th | 98   | node_802809                         | ADR79392     | capsid protein [Cytomegalovirus Eptesicus fuscus/IT/USA/2009]            | 5.00E-06 |
| th | 113  | node_822205                         | NP_612729    | tegument serine/threonine protein kinase [Panine herpesvirus 2]          | 5.00E-06 |
| th | 111  | node_94817                          | YP_067987    | BDRF1 [Macacine herpesvirus 4]                                           | 5.00E-06 |
| th | 237  | node9904_0_0_2115                   | NP_116452    | T103 [Tupaiaid herpesvirus 1]                                            | 5.00E-06 |
| th | 93   | 386874                              | YP_073776    | DNA packaging protein UL32 [Human herpesvirus 7]                         | 7.00E-06 |
| th | 276  | NODE_107525_length_246_cov_4.158536 | NP_064158    | pR52 [Murid herpesvirus 2]                                               | 7.00E-06 |
| th | 200  | node_265207                         | CAC84352     | primase [Saimiriine herpesvirus 2]                                       | 7.00E-06 |
| th | 170  | node_300384                         | YP_002321271 | gp87 [Caviid herpesvirus 2]                                              | 7.00E-06 |
| th | 746  | NODE_3533_length_716_cov_7.420391   | YP_002321299 | GP105 [Caviid herpesvirus 2]                                             | 7.00E-06 |
| th | 90   | node_703509                         | NP_048017    | helicase [Ateline herpesvirus 3]                                         | 7.00E-06 |
| th | 102  | node_711083                         | AAS99982     | JM5 [Macaca fuscata rhadinovirus]                                        | 7.00E-06 |
| th | 297  | NODE_88092_length_267_cov_11.666667 | NP_116386    | T37 [Tupaiaid herpesvirus 1]                                             | 7.00E-06 |
| th | 128  | NODE_95165_length_98_cov_5.704082   | YP_002321287 | gp104 [Caviid herpesvirus 2]                                             | 7.00E-06 |
| th | 90   | node_983709                         | YP_004207846 | single-stranded DNA binding protein [Rodent herpesvirus Peru]            | 7.00E-06 |
| th | 1102 | node442_0_0_26930                   | AAT00005     | JM28 [Macaca fuscata rhadinovirus]                                       | 8.00E-06 |
| th | 276  | 310793                              | ABB22266     | R-transactivator-like protein [Ovine herpesvirus 2]                      | 9.00E-06 |
| th | 111  | node_292225                         | NP_064198    | pR97 [Murid herpesvirus 2]                                               | 9.00E-06 |
| th | 135  | NODE_56865_length_105_cov_5.552381  | ADY62519     | DNA polymerase [Gorilla gorilla cytomegalovirus 2.1]                     | 9.00E-06 |
| th | 87   | node_726078                         | AAO46909     | DNA polymerase [Sus barbatus lymphotropic herpesvirus 1]                 | 9.00E-06 |
| th | 218  | NODE_77153_length_188_cov_9.531915  | NP_116386    | T37 [Tupaiaid herpesvirus 1]                                             | 9.00E-06 |
| th | 83   | node_776528                         | BAJ78563     | GP105 [Caviid herpesvirus 2]                                             | 9.00E-06 |
| th | 548  | 686233                              | BAA78211     | LT1 [Human herpesvirus 6B]                                               | 1.00E-05 |
| th | 310  | NODE_13240_length_280_cov_3.403571  | NP_116407    | T53 [Tupaiaid herpesvirus 1]                                             | 1.00E-05 |
| th | 163  | NODE_149053_length_133_cov_4.842105 | NP_612730    | deoxyribonuclease [Panine herpesvirus 2]                                 | 1.00E-05 |
| th | 1323 | NODE_33695_length_1293_cov_6.852282 | NP_116337    | t8 [Tupaiaid herpesvirus 1]                                              | 1.00E-05 |
| th | 97   | NODE_94533_length_67_cov_7.671642   | ACE95429     | M88 [Muromegalovirus WP15B]                                              | 1.00E-05 |
| th | 233  | NODE_102636_length_203_cov_2.044335 | AEL29801     | hypothetical protein [Bovine herpesvirus 4]                              | 2.00E-05 |
| th | 89   | node_1356849                        | ACE95568     | DNA polymerase [Muromegalovirus C4A]                                     | 2.00E-05 |
| th | 116  | NODE_206082_length_86_cov_3.220930  | YP_002321264 | gp80 [Caviid herpesvirus 2]                                              | 2.00E-05 |
| th | 79   | node_267223                         | ABR80649     | glycoprotein B [Eptesicus serotinus rhadinovirus 1]                      | 2.00E-05 |
| th | 90   | node_313980                         | NP_733881    | ORF28 [Callitrichine herpesvirus 3]                                      | 2.00E-05 |
| th | 166  | NODE_32150_length_136_cov_13.183824 | ACE95384     | anti-apoptotic protein [Muromegalovirus WP15B]                           | 2.00E-05 |
| th | 105  | NODE_42349_length_75_cov_2.053333   | ADV04385     | single-stranded DNA-binding protein [Human herpesvirus 5]                | 2.00E-05 |
| th | 203  | NODE_62327_length_173_cov_9.624277  | NP_116387    | T38 [Tupaiaid herpesvirus 1]                                             | 2.00E-05 |
| th | 80   | node_720451                         | NP_116454    | T105 [Tupaiaid herpesvirus 1]                                            | 2.00E-05 |
| th | 158  | 51491                               | YP_068012    | BALF2 [Macacine herpesvirus 4]                                           | 3.00E-05 |
| th | 435  | 677390                              | NP_064139    | pR34 [Murid herpesvirus 2]                                               | 3.00E-05 |

|         |     |                                     |                                      |                                                                  |                                                                                      |          |
|---------|-----|-------------------------------------|--------------------------------------|------------------------------------------------------------------|--------------------------------------------------------------------------------------|----------|
| th      | 91  | node_101396                         | YP_004207861                         | major capsid protein [Rodent herpesvirus Peru]                   | 3.00E-05                                                                             |          |
| th      | 124 | NODE_120385_length_94_cov_5.882979  | NP_116379                            | T30 [Tupaiaid herpesvirus 1]                                     | 3.00E-05                                                                             |          |
| th      | 130 | NODE_139865_length_100_cov_3.100000 | NP_116454                            | T105 [Tupaiaid herpesvirus 1]                                    | 3.00E-05                                                                             |          |
| th      | 93  | NODE_222061_length_63_cov_5.952381  | ADB08238                             | glycoprotein gB [Macaca mulatta rhadinovirus]                    | 3.00E-05                                                                             |          |
| th      | 200 | NODE_22697_length_170_cov_29.835295 | YP_073809                            | tegument serine/threonine protein kinase [Human herpesvirus 7]   | 3.00E-05                                                                             |          |
| th      | 217 | node_42331                          | ADVO4385                             | single-stranded DNA-binding protein [Human herpesvirus 5]        | 3.00E-05                                                                             |          |
| th      | 105 | node_655995                         | NP_064139                            | pR34 [Murid herpesvirus 2]                                       | 3.00E-05                                                                             |          |
| th      | 95  | node_75080                          | NP_612718                            | capsid triplex subunit 2 [Panine herpesvirus 2]                  | 3.00E-05                                                                             |          |
| th      | 110 | NODE_168606_length_80_cov_2.150000  | AAF59984                             | transport protein [Rhesus monkey rhadinovirus H26-95]            | 5.00E-05                                                                             |          |
| th      | 82  | node_528188                         | NP_116397                            | T44 [Tupaiaid herpesvirus 1]                                     | 5.00E-05                                                                             |          |
| th      | 117 | node_262911                         | ABV03816                             | UL54 [Colobus guereza cytomegalovirus 1.2]                       | 6.00E-05                                                                             |          |
| th      | 100 | NODE_63457_length_70_cov_2.371428   | NP_612687                            | DNA polymerase processivity subunit [Panine herpesvirus 2]       | 6.00E-05                                                                             |          |
| th      | 142 | 266098                              | ACY00455                             | ORF56 [Human herpesvirus 8]                                      | 8.00E-05                                                                             |          |
| th      | 87  | node_1326554                        | YP_073800                            | protein UL87 [Human herpesvirus 7]                               | 8.00E-05                                                                             |          |
| th      | 129 | NODE_158459_length_99_cov_2.787879  | NP_040228                            | hypothetical protein SaHV2gp27 [Saimiriine herpesvirus 2]        | 8.00E-05                                                                             |          |
| th      | 106 | NODE_200171_length_76_cov_2.328947  | NP_064194                            | pR89 [Murid herpesvirus 2]                                       | 8.00E-05                                                                             |          |
| th      | 168 | NODE_34067_length_138_cov_3.391304  | NP_116451                            | T102 [Tupaiaid herpesvirus 1]                                    | 8.00E-05                                                                             |          |
| th      | 193 | NODE_50571_length_163_cov_14.006135 | YP_002321239                         | gp46 [Caviid herpesvirus 2]                                      | 8.00E-05                                                                             |          |
| th      | 473 | NODE_68830_length_443_cov_4.902935  | YP_004933803                         | protein UL44 [Cynomolgus macaque cytomegalovirus strain Ottawa]  | 8.00E-05                                                                             |          |
| th      | 96  | node_704837                         | YP_004933882                         | protein UL105 [Cynomolgus macaque cytomegalovirus strain Ottawa] | 8.00E-05                                                                             |          |
| th      | 79  | 120281                              | ABH08757                             | DNA polymerase [Bandicota savillei rhadinovirus 1]               | 1.00E-04                                                                             |          |
| th      | 82  | 152254                              | BAJ78563                             | GP105 [Caviid herpesvirus 2]                                     | 1.00E-04                                                                             |          |
| th      | 92  | 476851                              | YP_004933814                         | protein UL49 [Cynomolgus macaque cytomegalovirus strain Ottawa]  | 1.00E-04                                                                             |          |
| th      | 143 | NODE_106171_length_113_cov_2.221239 | NP_042638                            | DNA helicase-primease complex component [Equid herpesvirus 2]    | 1.00E-04                                                                             |          |
| th      | 233 | NODE_126492_length_203_cov_3.896552 | NP_570752                            | hypothetical protein MmVgp09 [Macacine herpesvirus 5]            | 1.00E-04                                                                             |          |
| th      | 123 | node_142652                         | NP_064138                            | pR33 [Murid herpesvirus 2]                                       | 1.00E-04                                                                             |          |
| th      | 260 | NODE_22141_length_230_cov_2.530435  | YP_073770                            | tegument protein UL37 [Human herpesvirus 7]                      | 1.00E-04                                                                             |          |
| th      | 306 | NODE_37928_length_276_cov_2.231884  | AAT00100                             | JM123 [Macaca fuscata rhadinovirus]                              | 1.00E-04                                                                             |          |
| th      | 360 | NODE_60319_length_330_cov_12.275758 | NP_116368                            | T25 [Tupaiaid herpesvirus 1]                                     | 1.00E-04                                                                             |          |
| th      | 147 | node_752702                         | NP_116386                            | T37 [Tupaiaid herpesvirus 1]                                     | 1.00E-04                                                                             |          |
| th      | 127 | node_975218                         | NP_116446                            | T98 [Tupaiaid herpesvirus 1]                                     | 1.00E-04                                                                             |          |
| tblastx | lu  | 401                                 | 1421542                              | AF037218                                                         | Human herpesvirus 7 strain RK                                                        | 1.25E-13 |
|         | lu  | 169                                 | 1526298                              | U71366                                                           | Kaposi's sarcoma-associated herpes-like virus fragment II                            | 8.67E-13 |
|         | lu  | 349                                 | NODE_1629_length_319_cov_4.489028    | AF037218                                                         | Human herpesvirus 7 strain RK                                                        | 2.58E-09 |
|         | lu  | 208                                 | NODE_1015082_length_178_cov_1.904494 | AF037218                                                         | Human herpesvirus 7 strain RK                                                        | 1.77E-07 |
|         | lu  | 134                                 | node_2264031                         | AB021506                                                         | Human herpesvirus 6B DNA                                                             | 3.97E-07 |
|         | lu  | 100                                 | node_6202313                         | AF037218                                                         | Human herpesvirus 7 strain RK                                                        | 4.66E-07 |
|         | lu  | 123                                 | node_5080090                         | AF037218                                                         | Human herpesvirus 7 strain RK                                                        | 1.48E-06 |
|         | lu  | 564                                 | 1525723                              | EF526170                                                         | Gallid herpesvirus 2 strain 648a hypothetical protein                                | 2.94E-05 |
|         | th  | 1792                                | node110_0_5_125522                   | EF526176                                                         | Gallid herpesvirus 2 strain JM/102W hypothetical protein                             | 4.94E-16 |
|         | th  | 404                                 | NODE_36018_length_374_cov_8.112300   | AJ410493                                                         | Saimiriine herpesvirus 2 complete L-DNA sequence                                     | 1.36E-07 |
|         | th  | 150                                 | NODE_69529_length_120_cov_6.058333   | FJ483970                                                         | Aotine herpesvirus 1 strain S34E genomic sequence                                    | 1.02E-06 |
|         | th  | 82                                  | node_460558                          | FJ483970                                                         | Aotine herpesvirus 1 strain S34E genomic sequence                                    | 1.05E-06 |
|         | th  | 85                                  | node_1551951                         | AB592928                                                         | Caviid herpesvirus 2 DNA                                                             | 1.98E-06 |
|         | th  | 84                                  | 523245                               | AF232689                                                         | Rat cytomegalovirus Maastricht                                                       | 1.98E-06 |
|         | th  | 124                                 | node_508075                          | AF281817                                                         | Tupaia herpesvirus strain 2                                                          | 2.11E-06 |
|         | th  | 170                                 | NODE_140392_length_140_cov_2.914286  | FJ483969                                                         | Cercopithecine herpesvirus 5 strain Colburn                                          | 2.63E-06 |
|         | th  | 106                                 | NODE_78867_length_76_cov_4.500000    | Z83323                                                           | Phocid herpesvirus 2 HSV-2 ORF56-like gene                                           | 2.70E-06 |
|         | th  | 105                                 | NODE_190987_length_75_cov_2.506667   | FJ483967                                                         | Squirrel monkey cytomegalovirus 1 genomic sequence                                   | 2.70E-06 |
|         | th  | 103                                 | 260317                               | AF281817                                                         | Tupaia herpesvirus strain 2                                                          | 2.71E-06 |
|         | th  | 89                                  | node_58194                           | FJ483967                                                         | Squirrel monkey cytomegalovirus 1 genomic sequence                                   | 2.72E-06 |
|         | th  | 200                                 | NODE_168556_length_170_cov_3.205882  | AY528864                                                         | Macaca fuscata rhadinovirus                                                          | 3.59E-06 |
|         | th  | 100                                 | node_302679                          | AY528864                                                         | Macaca fuscata rhadinovirus                                                          | 3.72E-06 |
|         | th  | 87                                  | node_214360                          | GU305914                                                         | Murid herpesvirus 1 strain Smith                                                     | 3.74E-06 |
|         | th  | 179                                 | NODE_241260_length_149_cov_5.308725  | JN133502                                                         | Bovine herpesvirus 4 strain V.test long unique region                                | 4.95E-06 |
|         | th  | 225                                 | node11021_0_0_1372                   | JN133502                                                         | Bovine herpesvirus 4 strain V.test long unique region                                | 4.98E-06 |
|         | th  | 126                                 | NODE_132087_length_96_cov_2.010417   | AB592928                                                         | Caviid herpesvirus 2 DNA                                                             | 5.05E-06 |
|         | th  | 101                                 | node_1566023                         | AF281817                                                         | Tupaia herpesvirus strain 2                                                          | 5.11E-06 |
|         | th  | 85                                  | node_1626226                         | EU165547                                                         | Equid herpesvirus 7 strain T-07 DNA polymerase gene                                  | 5.14E-06 |
|         | th  | 84                                  | node_655558                          | HQ247774                                                         | Equid herpesvirus 2 strain 2B glycoprotein H (gH) gene                               | 5.14E-06 |
|         | th  | 90                                  | node_817724                          | AF281817                                                         | Tupaia herpesvirus strain 2                                                          | 5.48E-06 |
|         | th  | 224                                 | NODE_45604_length_194_cov_2.891752   | AF318573                                                         | Bovine herpesvirus 4 long unique region                                              | 5.86E-06 |
|         | th  | 150                                 | NODE_16970_length_120_cov_5.916667   | DQ198083                                                         | Ovine herpesvirus 2                                                                  | 6.88E-06 |
|         | th  | 129                                 | NODE_61112_length_99_cov_9.696970    | U20824                                                           | Equid herpesvirus 2                                                                  | 6.94E-06 |
|         | th  | 88                                  | node_547198                          | AY129396                                                         | Pongo pygmaeus cytomegalovirus 1 major DNA binding protein gene                      | 7.05E-06 |
|         | th  | 86                                  | node_1054203                         | AY528864                                                         | Macaca fuscata rhadinovirus                                                          | 7.06E-06 |
|         | th  | 85                                  | node_685769                          | AB592928                                                         | Caviid herpesvirus 2 DNA                                                             | 7.07E-06 |
|         | th  | 181                                 | NODE_95105_length_151_cov_12.006622  | AF281817                                                         | Tupaia herpesvirus strain 2                                                          | 9.34E-06 |
|         | th  | 118                                 | NODE_103018_length_88_cov_3.386364   | AB592928                                                         | Caviid herpesvirus 2 DNA                                                             | 9.57E-06 |
|         | th  | 223                                 | node11176_0_0_2862                   | AF480884                                                         | Chimpanzee cytomegalovirus                                                           | 9.82E-06 |
|         | th  | 83                                  | node_1500483                         | AY528864                                                         | Macaca fuscata rhadinovirus                                                          | 1.24E-05 |
|         | th  | 141                                 | node_16911                           | DQ198083                                                         | Ovine herpesvirus 2                                                                  | 1.30E-05 |
|         | th  | 141                                 | NODE_79159_length_111_cov_3.531532   | AF281817                                                         | Tupaia herpesvirus strain 2                                                          | 1.30E-05 |
|         | th  | 110                                 | NODE_166247_length_80_cov_4.237500   | FJ483970                                                         | Aotine herpesvirus 1 strain S34E genomic sequence                                    | 1.37E-05 |
|         | th  | 87                                  | node_1219384                         | GU305914                                                         | Murid herpesvirus 1 strain Smith                                                     | 1.83E-05 |
|         | th  | 138                                 | NODE_75850_length_108_cov_2.657408   | FJ483967                                                         | Squirrel monkey cytomegalovirus 1 genomic sequence                                   | 2.46E-05 |
|         | th  | 146                                 | NODE_190445_length_116_cov_6.922414  | AF480884                                                         | Chimpanzee cytomegalovirus                                                           | 2.48E-05 |
|         | th  | 121                                 | node_586716                          | AF281817                                                         | Tupaia herpesvirus strain 2                                                          | 2.48E-05 |
|         | th  | 83                                  | node_1055509                         | AF281817                                                         | Tupaia herpesvirus strain 2                                                          | 2.52E-05 |
|         | th  | 210                                 | NODE_21784_length_180_cov_3.505556   | AF318573                                                         | Bovine herpesvirus 4 long unique region                                              | 2.85E-05 |
|         | th  | 146                                 | 396730                               | JN227533                                                         | Cynomolgus macaque cytomegalovirus strain Ottawa                                     | 3.37E-05 |
|         | th  | 85                                  | node_148700                          | AF327830                                                         | Bovine lymphotropic herpesvirus DNA polymerase (DPOL) gene                           | 3.38E-05 |
|         | th  | 92                                  | NODE_212906_length_62_cov_2.112903   | AF157706                                                         | Human herpesvirus 6B strain Z29                                                      | 3.45E-05 |
|         | th  | 88                                  | node_329187                          | AF281817                                                         | Tupaia herpesvirus strain 2                                                          | 3.45E-05 |
|         | th  | 88                                  | node_602914                          | AB592928                                                         | Caviid herpesvirus 2 DNA                                                             | 3.45E-05 |
|         | th  | 88                                  | node_1251364                         | AF157706                                                         | Human herpesvirus 6B strain Z29                                                      | 3.45E-05 |
|         | th  | 157                                 | 311171                               | JN227533                                                         | Cynomolgus macaque cytomegalovirus strain Ottawa                                     | 4.61E-05 |
|         | th  | 121                                 | 604442                               | AF037218                                                         | Human herpesvirus 7 strain RK                                                        | 4.68E-05 |
|         | th  | 88                                  | node_1652319                         | AB592928                                                         | Caviid herpesvirus 2 DNA                                                             | 4.75E-05 |
|         | th  | 85                                  | node_559134                          | GU305914                                                         | Murid herpesvirus 1 strain Smith                                                     | 4.75E-05 |
|         | th  | 77                                  | node_564562                          | AF281817                                                         | Tupaia herpesvirus strain 2                                                          | 4.76E-05 |
|         | th  | 85                                  | node_742166                          | EF125071                                                         | Rattus exulans cytomegalovirus 1 glycoprotein B (gB) and DNA polymerase (DPOL) genes | 4.92E-05 |
|         | th  | 84                                  | node_996529                          | AF157706                                                         | Human herpesvirus 6B strain Z29                                                      | 4.93E-05 |
|         | th  | 78                                  | 389468                               | AY129397                                                         | Colobus guereza cytomegalovirus 1.1 major DNA binding protein (MDBP) gene            | 5.86E-05 |
|         | th  | 132                                 | NODE_94689_length_102_cov_2.245098   | AV037858                                                         | Cercopithecine herpesvirus 15 strain LCL8664                                         | 6.40E-05 |
|         | th  | 89                                  | node_425156                          | AB517983                                                         | Bat betaherpesvirus 2 gB                                                             | 6.51E-05 |
|         | th  | 89                                  | node_571568                          | GU305914                                                         | Murid herpesvirus 1 strain Smith                                                     | 6.51E-05 |
|         | th  | 78                                  | node_1725038                         | AF157706                                                         | Human herpesvirus 6B strain Z29                                                      | 6.53E-05 |
|         | th  | 79                                  | node_346731                          | AF232689                                                         | Rat cytomegalovirus Maastricht                                                       | 6.54E-05 |
|         | th  | 203                                 | NODE_112099_length_173_cov_7.739884  | JN133502                                                         | Bovine herpesvirus 4 strain V.test long unique region                                | 6.82E-05 |
|         | th  | 122                                 | NODE_190112_length_92_cov_3.206522   | U20824                                                           | Equid herpesvirus 2                                                                  | 8.02E-05 |
|         | th  | 89                                  | node_957450                          | JN133502                                                         | Bovine herpesvirus 4 strain V.test long unique region                                | 8.95E-05 |

|                         |    |      |                                      |              |                                                                                  |           |
|-------------------------|----|------|--------------------------------------|--------------|----------------------------------------------------------------------------------|-----------|
| Papillomaviridae blastn | lu | 96   | NODE_803976_length_66_cov_1.318182   | X70827       | Human papillomavirus type 4 complete genome                                      | 2.00E-16  |
|                         | th | 642  | 680206                               | DQ366842     | Rousettus aegyptiacus papillomavirus type 1                                      | 1.00E-41  |
|                         | th | 980  | 107285                               | AF020905     | Common chimpanzee papillomavirus 1                                               | 3.00E-10  |
|                         | th | 289  | NODE_19824_length_259_cov_3.791506   | DQ366842     | Rousettus aegyptiacus papillomavirus type 1                                      | 3.00E-09  |
|                         | th | 533  | 687996                               | DQ366842     | Rousettus aegyptiacus papillomavirus type 1                                      | 7.00E-09  |
|                         | th | 90   | node_728681                          | AF364505     | Macaca fascicularis papillomavirus isolate MFAA26 major capsid protein (L1) gene | 5.00E-07  |
|                         | th | 983  | NODE_12326_length_953_cov_5.002099   | DQ418472     | Human papillomavirus isolate FA156 major capsid protein L1 (L1) gene             | 6.00E-07  |
|                         | th | 78   | node_259828                          | GQ161313     | Human papillomavirus type 31 strain CU77 E1 gene                                 | 2.00E-05  |
|                         | th | 3358 | node19_0_0_80844                     | GU129016     | Human papillomavirus type 148                                                    | 1.00E-04  |
| blastx                  | th | 4036 | 681549                               | YP_717909    | E1 [Rousettus aegyptiacus papillomavirus type 1]                                 | 0         |
|                         | th | 3418 | 681815                               | YP_717912    | L2 [Rousettus aegyptiacus papillomavirus type 1]                                 | 6.00E-166 |
|                         | th | 1584 | 682004                               | CAB96121     | L1 [Cottontail rabbit papillomavirus]                                            | 2.00E-161 |
|                         | th | 1740 | 688209                               | NP_040902    | hypothetical protein HpV63gp1 [Human papillomavirus type 63]                     | 3.00E-144 |
|                         | th | 1301 | NODE_18539_length_1271_cov_8.662471  | YP_249604    | L1 [Procyon lotor papillomavirus 1]                                              | 5.00E-143 |
|                         | th | 1480 | 681254                               | Q07848       | unnamed protein product [Human papillomavirus type 65]                           | 2.00E-139 |
|                         | th | 1258 | 559198                               | YP_717912    | L2 [Rousettus aegyptiacus papillomavirus type 1]                                 | 8.00E-135 |
|                         | th | 1317 | 679786                               | NP_040902    | hypothetical protein HpV63gp1 [Human papillomavirus type 63]                     | 9.00E-134 |
|                         | th | 1418 | 683490                               | YP_717909    | E1 [Rousettus aegyptiacus papillomavirus type 1]                                 | 6.00E-127 |
|                         | th | 1188 | node354_0_0_12094                    | NP_057848    | major capsid protein L1 [Rabbit oral papillomavirus]                             | 1.00E-124 |
|                         | th | 1040 | node532_0_0_17651                    | AAB91540     | L1 protein [Cottontail rabbit papillomavirus]                                    | 4.00E-107 |
|                         | th | 1046 | 679116                               | NP_040902    | hypothetical protein HpV63gp1 [Human papillomavirus type 63]                     | 9.00E-99  |
|                         | th | 961  | 683255                               | NP_057848    | major capsid protein L1 [Rabbit oral papillomavirus]                             | 6.00E-91  |
|                         | th | 868  | 688552                               | Q07848       | unnamed protein product [Human papillomavirus type 65]                           | 4.00E-86  |
|                         | th | 1018 | 686111                               | NP_040294    | hypothetical protein [Human papillomavirus type 41]                              | 7.00E-85  |
|                         | th | 609  | 679637                               | YP_717909    | E1 [Rousettus aegyptiacus papillomavirus type 1]                                 | 8.00E-82  |
|                         | th | 1895 | 682085                               | YP_004646333 | E1 [Macaca fascicularis papillomavirus type 2]                                   | 1.00E-79  |
|                         | th | 717  | 683613                               | AAB91540     | L1 protein [Cottontail rabbit papillomavirus]                                    | 2.00E-76  |
|                         | th | 1388 | 678913                               | NP_040902    | hypothetical protein HpV63gp1 [Human papillomavirus type 63]                     | 3.00E-74  |
|                         | th | 585  | NODE_63452_length_555_cov_2.392793   | YP_717909    | E1 [Rousettus aegyptiacus papillomavirus type 1]                                 | 2.00E-67  |
|                         | th | 2809 | 677334                               | NP_040308    | minor capsid protein L2 [Human papillomavirus - 1]                               | 9.00E-67  |
|                         | th | 751  | 680697                               | YP_717909    | E1 [Rousettus aegyptiacus papillomavirus type 1]                                 | 8.00E-65  |
|                         | th | 785  | 684773                               | AAX86628     | E1 protein [Panthera leo persica papillomavirus type 1]                          | 9.00E-65  |
|                         | th | 554  | NODE_8694_length_524_cov_5.856870    | YP_717909    | E1 [Rousettus aegyptiacus papillomavirus type 1]                                 | 2.00E-58  |
|                         | th | 903  | 686877                               | YP_717912    | L2 [Rousettus aegyptiacus papillomavirus type 1]                                 | 4.00E-57  |
|                         | th | 1237 | 680991                               | YP_717910    | E2 [Rousettus aegyptiacus papillomavirus type 1]                                 | 1.00E-53  |
|                         | th | 558  | 680824                               | AAF25684     | major capsid protein [Human papillomavirus type 11]                              | 9.00E-53  |
|                         | th | 498  | 182216                               | P36719       | envelope protein [Human papillomavirus type 3]                                   | 5.00E-51  |
|                         | th | 1037 | 688335                               | YP_717910    | E2 [Rousettus aegyptiacus papillomavirus type 1]                                 | 2.00E-49  |
|                         | th | 487  | NODE_10156_length_457_cov_4.958425   | NP_040294    | hypothetical protein [Human papillomavirus type 41]                              | 7.00E-49  |
|                         | th | 396  | 688353                               | YP_717909    | E1 [Rousettus aegyptiacus papillomavirus type 1]                                 | 2.00E-48  |
|                         | th | 922  | NODE_5945_length_892_cov_18.312780   | YP_717910    | E2 [Rousettus aegyptiacus papillomavirus type 1]                                 | 1.00E-47  |
|                         | th | 725  | NODE_28399_length_695_cov_6.548202   | YP_717912    | L2 [Rousettus aegyptiacus papillomavirus type 1]                                 | 5.00E-47  |
|                         | th | 451  | 54628                                | AC146053     | L1 [Feline papillomavirus type 2]                                                | 2.00E-43  |
|                         | th | 588  | node1931_0_0_6190                    | YP_717910    | E2 [Rousettus aegyptiacus papillomavirus type 1]                                 | 2.00E-43  |
|                         | th | 456  | 685878                               | YP_717909    | E1 [Rousettus aegyptiacus papillomavirus type 1]                                 | 3.00E-42  |
|                         | th | 640  | 687870                               | YP_717910    | E2 [Rousettus aegyptiacus papillomavirus type 1]                                 | 4.00E-40  |
|                         | th | 928  | 685569                               | YP_249603    | L2 [Procyon lotor papillomavirus 1]                                              | 9.00E-39  |
|                         | th | 1163 | 685927                               | NP_848022    | E2 protein [Felis domesticus papillomavirus type 1]                              | 3.00E-38  |
|                         | th | 1424 | NODE_15294_length_1394_cov_9.882353  | NP_057843    | regulatory protein E1 [Rabbit oral papillomavirus]                               | 1.00E-37  |
|                         | th | 261  | NODE_36003_length_231_cov_3.199134   | YP_717909    | E1 [Rousettus aegyptiacus papillomavirus type 1]                                 | 1.00E-35  |
|                         | th | 460  | 684354                               | YP_717910    | E2 [Rousettus aegyptiacus papillomavirus type 1]                                 | 6.00E-35  |
|                         | th | 395  | NODE_157906_length_365_cov_8.391781  | YP_717910    | E2 [Rousettus aegyptiacus papillomavirus type 1]                                 | 3.00E-34  |
|                         | th | 969  | node636_0_0_13356                    | YP_003204680 | L2 [Canine papillomavirus 6]                                                     | 3.00E-33  |
|                         | th | 316  | NODE_61511_length_286_cov_2.496504   | Q07848       | unnamed protein product [Human papillomavirus type 65]                           | 5.00E-33  |
|                         | th | 365  | NODE_70804_length_335_cov_5.982090   | NP_040902    | hypothetical protein HpV63gp1 [Human papillomavirus type 63]                     | 3.00E-32  |
|                         | th | 1044 | 682535                               | YP_717907    | E6 [Rousettus aegyptiacus papillomavirus type 1]                                 | 2.00E-31  |
|                         | th | 505  | 684466                               | YP_249604    | L1 [Procyon lotor papillomavirus 1]                                              | 2.00E-31  |
|                         | th | 331  | 683978                               | YP_717913    | L1 [Rousettus aegyptiacus papillomavirus type 1]                                 | 4.00E-31  |
|                         | th | 734  | 685485                               | YP_249604    | L1 [Procyon lotor papillomavirus 1]                                              | 2.00E-30  |
|                         | th | 339  | NODE_62762_length_309_cov_3.906149   | ABX56103     | E1 [Macaca fascicularis papillomavirus type 5]                                   | 4.00E-30  |
|                         | th | 296  | NODE_49920_length_266_cov_5.048872   | NP_057848    | major capsid protein L1 [Rabbit oral papillomavirus]                             | 7.00E-30  |
|                         | th | 370  | NODE_12387_length_340_cov_5.502941   | AEM05818     | E1 [Peromyscus papillomavirus type 1]                                            | 9.00E-30  |
|                         | th | 258  | NODE_75399_length_228_cov_4.934210   | YP_717909    | E1 [Rousettus aegyptiacus papillomavirus type 1]                                 | 1.00E-29  |
|                         | th | 705  | 682796                               | NP_040901    | hypothetical protein HpV63gp1 [Human papillomavirus type 63]                     | 2.00E-29  |
|                         | th | 310  | NODE_103151_length_280_cov_13.628572 | YP_003778198 | L1 [Mus musculus papillomavirus type 1]                                          | 1.00E-28  |
|                         | th | 947  | NODE_32789_length_917_cov_9.014176   | NP_848022    | E2 protein [Felis domesticus papillomavirus type 1]                              | 3.00E-28  |
|                         | th | 565  | node2082_0_0_13262                   | NP_040294    | hypothetical protein [Human papillomavirus type 41]                              | 5.00E-28  |
|                         | th | 422  | 685012                               | AEP82740     | L1 [Canine papillomavirus 9]                                                     | 1.00E-27  |
|                         | th | 929  | 682800                               | NP_040294    | hypothetical protein [Human papillomavirus type 41]                              | 2.00E-27  |
|                         | th | 1423 | 686973                               | YP_717907    | E6 [Rousettus aegyptiacus papillomavirus type 1]                                 | 2.00E-27  |
|                         | th | 267  | NODE_40994_length_237_cov_5.421941   | AAX86628     | E1 protein [Panthera leo persica papillomavirus type 1]                          | 2.00E-26  |
|                         | th | 1098 | 685105                               | NP_040901    | hypothetical protein HpV63gp1 [Human papillomavirus type 63]                     | 3.00E-26  |
|                         | th | 209  | NODE_105355_length_179_cov_7.491620  | YP_717909    | E1 [Rousettus aegyptiacus papillomavirus type 1]                                 | 6.00E-26  |
|                         | th | 322  | NODE_14251_length_292_cov_6.410959   | YP_249604    | L1 [Procyon lotor papillomavirus 1]                                              | 1.00E-25  |
|                         | th | 825  | NODE_8454_length_795_cov_6.052830    | NP_040308    | minor capsid protein L2 [Human papillomavirus - 1]                               | 1.00E-25  |
|                         | th | 209  | node_4409                            | YP_717913    | L1 [Rousettus aegyptiacus papillomavirus type 1]                                 | 2.00E-25  |
|                         | th | 1083 | 685405                               | YP_717907    | E6 [Rousettus aegyptiacus papillomavirus type 1]                                 | 3.00E-25  |
|                         | th | 338  | 679634                               | YP_717907    | E6 [Rousettus aegyptiacus papillomavirus type 1]                                 | 4.00E-24  |
|                         | th | 222  | NODE_33773_length_192_cov_5.666667   | NP_057848    | major capsid protein L1 [Rabbit oral papillomavirus]                             | 6.00E-24  |
|                         | th | 274  | node7330_0_0_2072                    | YP_001595472 | major structural protein [Bandicoot papillomatosis carcinomatosis virus type 1]  | 7.00E-24  |
|                         | th | 591  | node1910_0_0_7492                    | NP_040901    | hypothetical protein HpV63gp1 [Human papillomavirus type 63]                     | 9.00E-24  |
|                         | th | 261  | 24772                                | NP_057848    | major capsid protein L1 [Rabbit oral papillomavirus]                             | 2.00E-23  |
|                         | th | 829  | 687312                               | AAX86615     | E2 protein [Lynx rufus papillomavirus type 1]                                    | 2.00E-23  |
|                         | th | 249  | NODE_116688_length_219_cov_4.872146  | YP_717913    | L1 [Rousettus aegyptiacus papillomavirus type 1]                                 | 2.00E-23  |
|                         | th | 268  | node7714_0_0_1900                    | YP_717910    | E2 [Rousettus aegyptiacus papillomavirus type 1]                                 | 2.00E-23  |
|                         | th | 897  | 683353                               | NP_848022    | E2 protein [Felis domesticus papillomavirus type 1]                              | 4.00E-23  |
|                         | th | 963  | 684943                               | YP_717909    | E1 [Rousettus aegyptiacus papillomavirus type 1]                                 | 7.00E-23  |
|                         | th | 366  | NODE_60439_length_336_cov_3.642857   | AAX86629     | E2 protein [Panthera leo persica papillomavirus type 1]                          | 4.00E-22  |
|                         | th | 795  | 684621                               | NP_848022    | E2 protein [Felis domesticus papillomavirus type 1]                              | 2.00E-21  |
|                         | th | 187  | NODE_128029_length_157_cov_5.592357  | YP_717909    | E1 [Rousettus aegyptiacus papillomavirus type 1]                                 | 2.00E-21  |
|                         | th | 194  | NODE_152208_length_164_cov_4.018293  | BAL14429     | hypothetical protein [Human papillomavirus type 126]                             | 2.00E-21  |
|                         | th | 323  | 682751                               | YP_717909    | E1 [Rousettus aegyptiacus papillomavirus type 1]                                 | 4.00E-21  |
|                         | th | 456  | 679654                               | YP_717913    | L1 [Rousettus aegyptiacus papillomavirus type 1]                                 | 8.00E-21  |
|                         | th | 206  | NODE_128758_length_176_cov_2.073864  | YP_002427692 | helicase [Erinaceus europaeus papillomavirus]                                    | 1.00E-20  |
|                         | th | 227  | NODE_91465_length_197_cov_5.015228   | YP_717906    | putative major capsid protein [Canine papillomavirus 3]                          | 1.00E-20  |
|                         | th | 227  | NODE_37383_length_197_cov_7.197969   | YP_717913    | L1 [Rousettus aegyptiacus papillomavirus type 1]                                 | 2.00E-20  |
|                         | th | 526  | node2374_0_0_11064                   | NP_848022    | E2 protein [Felis domesticus papillomavirus type 1]                              | 2.00E-20  |
|                         | th | 299  | node6209_0_0_4772                    | YP_717907    | E6 [Rousettus aegyptiacus papillomavirus type 1]                                 | 3.00E-20  |
|                         | th | 228  | NODE_152595_length_198_cov_13.671718 | YP_717909    | E1 [Rousettus aegyptiacus papillomavirus type 1]                                 | 7.00E-20  |
|                         | th | 259  | NODE_44112_length_229_cov_11.296944  | YP_717910    | E2 [Rousettus aegyptiacus papillomavirus type 1]                                 | 9.00E-20  |
|                         | th | 420  | 687243                               | YP_249600    | E1 [Procyon lotor papillomavirus 1]                                              | 9.00E-20  |
|                         | th | 1217 | 688308                               | AAX86631     | L2 protein [Panthera leo persica papillomavirus type 1]                          | 1.00E-19  |

|    |      |                                     |              |                                                                |          |
|----|------|-------------------------------------|--------------|----------------------------------------------------------------|----------|
| th | 202  | NODE_138995_length_172_cov_3.348837 | YP_001931973 | L1 [Ursus maritimus papillomavirus 1]                          | 2.00E-19 |
| th | 309  | NODE_3281_length_279_cov_2.437276   | AEP82743     | E1 [Canine papillomavirus 10]                                  | 2.00E-19 |
| th | 194  | NODE_56977_length_164_cov_5.018293  | AAB91540     | L1 [protein [Cottontail rabbit papillomavirus]                 | 2.00E-19 |
| th | 220  | NODE_53567_length_190_cov_5.968421  | YP_717912    | L2 [Rousettus aegyptiacus papillomavirus type 1]               | 3.00E-19 |
| th | 195  | NODE_42592_length_165_cov_3.890909  | AAX86628     | E1 protein [Panthera leo persica papillomavirus type 1]        | 6.00E-19 |
| th | 262  | NODE_68219_length_232_cov_7.137931  | YP_717910    | E2 [Rousettus aegyptiacus papillomavirus type 1]               | 7.00E-19 |
| th | 334  | NODE_57472_length_304_cov_4.203948  | YP_249600    | E1 [Procyon lotor papillomavirus 1]                            | 9.00E-19 |
| th | 242  | NODE_42161_length_212_cov_2.415094  | YP_717909    | E1 [Rousettus aegyptiacus papillomavirus type 1]               | 1.00E-18 |
| th | 150  | 494124                              | YP_717913    | L1 [Rousettus aegyptiacus papillomavirus type 1]               | 2.00E-18 |
| th | 641  | 686724                              | ACV30150     | E1 [Human papillomavirus type 118]                             | 2.00E-18 |
| th | 176  | node_315631                         | BAL14429     | hypothetical protein [Human papillomavirus type 126]           | 2.00E-18 |
| th | 196  | NODE_33309_length_166_cov_3.722892  | NP_040294    | hypothetical protein [Human papillomavirus type 41]            | 2.00E-18 |
| th | 202  | NODE_9310_length_172_cov_9.558140   | AAX86625     | L1 protein [Puma concolor papillomavirus type 1]               | 2.00E-18 |
| th | 165  | NODE_38958_length_135_cov_3.992593  | NP_057848    | major capsid protein L1 [Rabbit oral papillomavirus]           | 3.00E-18 |
| th | 207  | 640599                              | YP_002117846 | L1 [Tursiops truncatus papillomavirus 1]                       | 4.00E-18 |
| th | 239  | NODE_76890_length_209_cov_6.856459  | YP_717910    | E2 [Rousettus aegyptiacus papillomavirus type 1]               | 4.00E-18 |
| th | 541  | 681010                              | ACOS8658     | putative replication protein E1 [Ovine papillomavirus 3]       | 6.00E-18 |
| th | 224  | NODE_105386_length_194_cov_3.180412 | YP_004646333 | E1 [Macaca fascicularis papillomavirus type 2]                 | 1.00E-17 |
| th | 225  | 338510                              | AAA47016     | coat protein [Human papillomavirus type 13]                    | 2.00E-17 |
| th | 506  | 512302                              | ACOS8660     | putative minor capsid protein L2 [Ovine papillomavirus 3]      | 2.00E-17 |
| th | 234  | NODE_138324_length_204_cov_3.382353 | YP_717909    | E1 [Rousettus aegyptiacus papillomavirus type 1]               | 2.00E-17 |
| th | 238  | NODE_92864_length_208_cov_4.105769  | YP_004857837 | E1 [Morelia spilota papillomavirus 1]                          | 3.00E-17 |
| th | 155  | 454431                              | AET11874     | E1 protein [Human Papillomavirus type 153]                     | 5.00E-17 |
| th | 243  | NODE_20773_length_213_cov_3.507042  | YP_717909    | E1 [Rousettus aegyptiacus papillomavirus type 1]               | 7.00E-17 |
| th | 465  | NODE_119139_length_435_cov_4.781609 | CAF05704     | E1 protein [Human papillomavirus type 95]                      | 9.00E-17 |
| th | 283  | NODE_45238_length_253_cov_6.976285  | YP_717907    | E6 [Rousettus aegyptiacus papillomavirus type 1]               | 9.00E-17 |
| th | 152  | NODE_102966_length_122_cov_5.377049 | NP_040902    | hypothetical protein HpV63gp1 [Human papillomavirus type 63]   | 1.00E-16 |
| th | 215  | node11965_0_0_1851                  | YP_717913    | L1 [Rousettus aegyptiacus papillomavirus type 1]               | 1.00E-16 |
| th | 313  | 190787                              | YP_656497    | L2 protein [Human papillomavirus type 103]                     | 3.00E-16 |
| th | 783  | 218431                              | YP_717910    | E2 [Rousettus aegyptiacus papillomavirus type 1]               | 3.00E-16 |
| th | 151  | NODE_148981_length_121_cov_4.033058 | NP_043439    | replication protein E1 [Human papillomavirus type 60]          | 3.00E-16 |
| th | 155  | 179367                              | AAX86621     | E1 protein [Puma concolor papillomavirus type 1]               | 6.00E-16 |
| th | 175  | NODE_16005_length_145_cov_4.813793  | YP_003204677 | E1 [Canine papillomavirus 6]                                   | 6.00E-16 |
| th | 264  | NODE_100233_length_234_cov_5.918803 | YP_717907    | E6 [Rousettus aegyptiacus papillomavirus type 1]               | 1.00E-15 |
| th | 202  | NODE_4716_length_172_cov_9.139535   | YP_717913    | L1 [Rousettus aegyptiacus papillomavirus type 1]               | 2.00E-15 |
| th | 152  | NODE_78718_length_122_cov_7.737705  | AET11874     | E1 protein [Human Papillomavirus type 153]                     | 3.00E-15 |
| th | 300  | 686049                              | YP_002117841 | E1 [Tursiops truncatus papillomavirus 1]                       | 4.00E-15 |
| th | 878  | 687946                              | NP_040305    | E6 protein [Human papillomavirus - 1]                          | 4.00E-15 |
| th | 163  | NODE_55846_length_133_cov_9.052631  | NP_040308    | minor capsid protein L2 [Human papillomavirus - 1]             | 4.00E-15 |
| th | 230  | 83162                               | YP_249600    | E1 [Procyon lotor papillomavirus 1]                            | 5.00E-15 |
| th | 170  | NODE_16402_length_140_cov_8.071428  | YP_717912    | L2 [Rousettus aegyptiacus papillomavirus type 1]               | 5.00E-15 |
| th | 1279 | 679992                              | NP_040305    | E6 protein [Human papillomavirus - 1]                          | 6.00E-15 |
| th | 231  | NODE_35577_length_201_cov_5.398010  | AAQ72425     | L1 protein [Human papillomavirus]                              | 8.00E-15 |
| th | 597  | 687562                              | NP_040305    | E6 protein [Human papillomavirus - 1]                          | 1.00E-14 |
| th | 329  | NODE_103882_length_299_cov_3.244147 | YP_717912    | L2 [Rousettus aegyptiacus papillomavirus type 1]               | 1.00E-14 |
| th | 179  | NODE_142142_length_149_cov_2.087248 | AAX86625     | L1 protein [Puma concolor papillomavirus type 1]               | 1.00E-14 |
| th | 219  | NODE_158073_length_189_cov_4.333333 | AEP82747     | L1 [Canine papillomavirus 10]                                  | 1.00E-14 |
| th | 194  | NODE_32945_length_164_cov_4.518293  | Q07848       | unnamed protein product [Human papillomavirus type 65]         | 1.00E-14 |
| th | 263  | NODE_66862_length_233_cov_6.128756  | CAA63876     | E2 [Human papillomavirus - 72]                                 | 1.00E-14 |
| th | 153  | 489545                              | YP_003778198 | L1 [Mus musculus papillomavirus type 1]                        | 3.00E-14 |
| th | 146  | NODE_119171_length_116_cov_4.525862 | YP_717909    | E1 [Rousettus aegyptiacus papillomavirus type 1]               | 4.00E-14 |
| th | 261  | node8087_0_0_2118                   | YP_717910    | E2 [Rousettus aegyptiacus papillomavirus type 1]               | 4.00E-14 |
| th | 148  | NODE_168183_length_118_cov_2.635593 | YP_003169705 | L1 [Rattus norvegicus papillomavirus 1 EES-2009]               | 5.00E-14 |
| th | 200  | NODE_63293_length_170_cov_4.229412  | NP_040309    | major capsid protein L1 [Human papillomavirus - 1]             | 7.00E-14 |
| th | 622  | NODE_18916_length_592_cov_5.407094  | YP_717907    | E6 [Rousettus aegyptiacus papillomavirus type 1]               | 1.00E-13 |
| th | 140  | node_951000                         | AEI61088     | early protein E1 [Human papillomavirus type 31]                | 1.00E-13 |
| th | 191  | NODE_42137_length_161_cov_4.981367  | YP_717909    | E1 [Rousettus aegyptiacus papillomavirus type 1]               | 2.00E-13 |
| th | 409  | NODE_77259_length_379_cov_7.902375  | YP_717910    | E2 [Rousettus aegyptiacus papillomavirus type 1]               | 3.00E-13 |
| th | 371  | 684917                              | YP_249600    | E1 [Procyon lotor papillomavirus 1]                            | 4.00E-13 |
| th | 143  | NODE_19016_length_113_cov_3.699115  | ADH29821     | replication protein E1 [Human papillomavirus type 123]         | 4.00E-13 |
| th | 301  | 682830                              | AAX86621     | E1 protein [Puma concolor papillomavirus type 1]               | 5.00E-13 |
| th | 185  | NODE_52879_length_155_cov_4.670968  | ABX56103     | E1 [Macaca fascicularis papillomavirus type 5]                 | 5.00E-13 |
| th | 183  | 565915                              | AAM92153     | putative replication protein E1 [Human papillomavirus type 89] | 6.00E-13 |
| th | 264  | node7919_0_0_2083                   | CAW42231     | L2 protein [Human papillomavirus type 99]                      | 6.00E-13 |
| th | 335  | 84375                               | ABA61876     | L2 [Uncia uncia papillomavirus type 1]                         | 1.00E-12 |
| th | 188  | NODE_128760_length_158_cov_3.069620 | ADJ96360     | E1 protein [Lagenorhynchus acutus papillomavirus]              | 1.00E-12 |
| th | 141  | NODE_150177_length_111_cov_6.918919 | YP_717913    | L1 [Rousettus aegyptiacus papillomavirus type 1]               | 1.00E-12 |
| th | 173  | NODE_118864_length_143_cov_3.405594 | NP_057848    | major capsid protein L1 [Rabbit oral papillomavirus]           | 2.00E-12 |
| th | 142  | node_687189                         | ACOS8660     | putative minor capsid protein L2 [Ovine papillomavirus 3]      | 2.00E-12 |
| th | 445  | 678701                              | AEI61392     | early protein E1 [Human papillomavirus type 35]                | 3.00E-12 |
| th | 196  | NODE_60630_length_166_cov_5.710844  | YP_001931973 | L1 [Ursus maritimus papillomavirus 1]                          | 3.00E-12 |
| th | 380  | 681099                              | YP_717909    | E1 [Rousettus aegyptiacus papillomavirus type 1]               | 4.00E-12 |
| th | 398  | NODE_107409_length_368_cov_2.750000 | NP_040309    | major capsid protein L1 [Human papillomavirus - 1]             | 4.00E-12 |
| th | 426  | NODE_63573_length_396_cov_4.088384  | ACZ58405     | early protein E1 [Human papillomavirus type 115]               | 4.00E-12 |
| th | 337  | 678159                              | NP_040902    | hypothetical protein HpV63gp1 [Human papillomavirus type 63]   | 6.00E-12 |
| th | 137  | node_716770                         | NP_040902    | hypothetical protein HpV63gp1 [Human papillomavirus type 63]   | 6.00E-12 |
| th | 135  | node_247843                         | YP_717913    | L1 [Rousettus aegyptiacus papillomavirus type 1]               | 8.00E-12 |
| th | 673  | 678335                              | YP_717909    | E1 [Rousettus aegyptiacus papillomavirus type 1]               | 1.00E-11 |
| th | 677  | NODE_12671_length_647_cov_3.275116  | AAX86626     | E6 protein [Panthera leo persica papillomavirus type 1]        | 1.00E-11 |
| th | 296  | NODE_16215_length_266_cov_4.187970  | NP_040901    | hypothetical protein HpV63gp1 [Human papillomavirus type 63]   | 1.00E-11 |
| th | 133  | NODE_211136_length_103_cov_5.514563 | NP_597847    | replication protein E1 [Ovine papillomavirus - 1]              | 1.00E-11 |
| th | 302  | NODE_4095_length_272_cov_4.834559   | ACI46051     | E2 [Feline papillomavirus type 2]                              | 1.00E-11 |
| th | 970  | 678356                              | YP_003668027 | replication protein E1 [Human papillomavirus 121]              | 2.00E-11 |
| th | 787  | 689064                              | AAX86626     | E6 protein [Panthera leo persica papillomavirus type 1]        | 2.00E-11 |
| th | 199  | NODE_64206_length_169_cov_3.047337  | YP_002635573 | putative L2 [Equine papillomavirus 2]                          | 2.00E-11 |
| th | 201  | NODE_96770_length_171_cov_2.631579  | ADQ85946     | L2 [Human papillomavirus type 149]                             | 2.00E-11 |
| th | 157  | node_346373                         | NP_775307    | E1 [Human papillomavirus type 92]                              | 3.00E-11 |
| th | 409  | NODE_57833_length_379_cov_7.638523  | YP_003204680 | L2 [Canine papillomavirus 6]                                   | 3.00E-11 |
| th | 469  | 684759                              | YP_003668027 | replication protein E1 [Human papillomavirus 121]              | 4.00E-11 |
| th | 131  | NODE_166916_length_101_cov_2.267327 | YP_717909    | E1 [Rousettus aegyptiacus papillomavirus type 1]               | 6.00E-11 |
| th | 249  | 287029                              | NP_040309    | major capsid protein L1 [Human papillomavirus - 1]             | 7.00E-11 |
| th | 732  | 680435                              | CAW42273     | E2 protein [Human papillomavirus type 113]                     | 9.00E-11 |
| th | 180  | NODE_44030_length_150_cov_3.680000  | ADH29829     | regulatory protein E2 [Human papillomavirus type 124]          | 9.00E-11 |
| th | 431  | 14875                               | ADD14050     | L2 protein [Human papillomavirus type 114]                     | 1.00E-10 |
| th | 464  | 686048                              | YP_717909    | E1 [Rousettus aegyptiacus papillomavirus type 1]               | 1.00E-10 |
| th | 149  | node_448657                         | YP_717909    | E1 [Rousettus aegyptiacus papillomavirus type 1]               | 1.00E-10 |
| th | 151  | NODE_68226_length_121_cov_4.512397  | NP_040902    | hypothetical protein HpV63gp1 [Human papillomavirus type 63]   | 1.00E-10 |
| th | 330  | 677216                              | ADH29829     | regulatory protein E2 [Human papillomavirus type 124]          | 2.00E-10 |
| th | 162  | NODE_158678_length_132_cov_2.068182 | ADH29822     | regulatory protein E2 [Human papillomavirus type 123]          | 2.00E-10 |
| th | 181  | NODE_174500_length_151_cov_3.125828 | YP_249600    | E1 [Procyon lotor papillomavirus 1]                            | 2.00E-10 |
| th | 176  | NODE_38358_length_146_cov_7.554794  | YP_717913    | L1 [Rousettus aegyptiacus papillomavirus type 1]               | 2.00E-10 |
| th | 124  | node_428548                         | YP_002427692 | helicase [Erinaceus europaeus papillomavirus]                  | 2.00E-10 |



|    |     |                                     |              |                                                                             |          |
|----|-----|-------------------------------------|--------------|-----------------------------------------------------------------------------|----------|
| th | 129 | NODE_6993_length_99_cov_2.646465    | NP_040309    | major capsid protein L1 [Human papillomavirus - 1]                          | 2.00E-10 |
| th | 143 | node_378803                         | AAX86628     | E1 protein [Panthera leo persica papillomavirus type 1]                     | 4.00E-10 |
| th | 378 | 237317                              | AEM05820     | L2 [Peromyscus papillomavirus type 1]                                       | 5.00E-10 |
| th | 126 | node_254746                         | NP_056819    | late protein [Canine oral papillomavirus]                                   | 5.00E-10 |
| th | 207 | NODE_33702_length_194_cov_3.273196  | YP_717912    | L2 [Roussetus aegyptiacus papillomavirus type 1]                            | 5.00E-10 |
| th | 168 | NODE_16262_length_438_cov_3.052511  | YP_003668027 | replication protein E1 [Human papillomavirus 121]                           | 8.00E-10 |
| th | 484 | NODE_192009_length_154_cov_2.175325 | YP_002004570 | E2 [Capreolus capreolus papillomavirus 1]                                   | 1.00E-09 |
| th | 126 | NODE_67524_length_96_cov_10.562500  | NP_040294    | hypothetical protein [Human papillomavirus type 41]                         | 1.00E-09 |
| th | 134 | NODE_105560_length_104_cov_2.048077 | Q05137       | late protein [Human papillomavirus type 15]                                 | 2.00E-09 |
| th | 122 | NODE_21509_length_92_cov_3.065217   | YP_249604    | L1 [Procyon lotor papillomavirus 1]                                         | 2.00E-09 |
| th | 492 | NODE_32088_length_462_cov_27.025974 | YP_003204680 | L2 [Canine papillomavirus 6]                                                | 2.00E-09 |
| th | 217 | NODE_19887_length_187_cov_5.406417  | YP_717913    | L1 [Roussetus aegyptiacus papillomavirus type 1]                            | 3.00E-09 |
| th | 174 | NODE_24160_length_144_cov_2.888889  | ACX32368     | L1 [Human papillomavirus type 53]                                           | 3.00E-09 |
| th | 109 | node_269347                         | BAL14429     | hypothetical protein [Human papillomavirus type 126]                        | 3.00E-09 |
| th | 355 | NODE_125975_length_325_cov_3.907692 | YP_003204677 | E1 [Canine papillomavirus 6]                                                | 5.00E-09 |
| th | 125 | NODE_243712_length_95_cov_2.305263  | YP_224223    | E1 [Erethizon dorsatum papillomavirus type 1]                               | 5.00E-09 |
| th | 123 | node_325765                         | NP_848025    | L1 protein [Felis domesticus papillomavirus type 1]                         | 5.00E-09 |
| th | 194 | NODE_43068_length_164_cov_2.371951  | YP_717909    | E1 [Roussetus aegyptiacus papillomavirus type 1]                            | 5.00E-09 |
| th | 101 | node_98222                          | YP_717909    | E1 [Roussetus aegyptiacus papillomavirus type 1]                            | 5.00E-09 |
| th | 402 | 678719                              | AEP82743     | E1 [Canine papillomavirus 10]                                               | 7.00E-09 |
| th | 287 | 679302                              | CCS55756     | major capsid protein [Human papillomavirus type 11]                         | 7.00E-09 |
| th | 142 | NODE_65908_length_112_cov_7.285714  | ABP99779     | E2 [Human papillomavirus type 18]                                           | 7.00E-09 |
| th | 659 | NODE_43244_length_629_cov_2.686805  | YP_717908    | E7 [Roussetus aegyptiacus papillomavirus type 1]                            | 8.00E-09 |
| th | 215 | NODE_114357_length_185_cov_5.783784 | YP_003204677 | E1 [Canine papillomavirus 6]                                                | 9.00E-09 |
| th | 177 | NODE_132068_length_147_cov_4.129251 | CAB96121     | L1 [Cottontail rabbit papillomavirus]                                       | 9.00E-09 |
| th | 212 | NODE_17127_length_182_cov_5.362638  | YP_717907    | E6 [Roussetus aegyptiacus papillomavirus type 1]                            | 9.00E-09 |
| th | 158 | NODE_21685_length_128_cov_2.875000  | YP_004346964 | E1 [Zalophus californianus papillomavirus 1]                                | 9.00E-09 |
| th | 122 | node_704239                         | NP_040294    | hypothetical protein [Human papillomavirus type 41]                         | 9.00E-09 |
| th | 549 | 686557                              | YP_717909    | E1 [Roussetus aegyptiacus papillomavirus type 1]                            | 1.00E-08 |
| th | 162 | NODE_9309_length_132_cov_6.060606   | NP_040309    | major capsid protein L1 [Human papillomavirus - 1]                          | 1.00E-08 |
| th | 474 | 680096                              | ACOS8660     | putative minor capsid protein L2 [Ovine papillomavirus 3]                   | 2.00E-08 |
| th | 331 | NODE_16214_length_301_cov_3.039867  | NP_040309    | major capsid protein L1 [Human papillomavirus - 1]                          | 2.00E-08 |
| th | 127 | node_170924                         | YP_003204674 | L1 [Canine papillomavirus 5]                                                | 2.00E-08 |
| th | 118 | NODE_36249_length_88_cov_3.136364   | YP_003104799 | E1 [Francolinus leucoscepus papillomavirus 1]                               | 2.00E-08 |
| th | 116 | node_523898                         | YP_003622569 | L1 [Bettongia penicillata papillomavirus 1]                                 | 2.00E-08 |
| th | 112 | NODE_59889_length_82_cov_4.560976   | YP_224227    | major capsid protein [Erethizon dorsatum papillomavirus type 1]             | 2.00E-08 |
| th | 124 | node_721731                         | AAG27046     | major capsid protein L1 [Human papillomavirus]                              | 2.00E-08 |
| th | 554 | NODE_8695_length_119_cov_6.529412   | YP_717909    | E1 [Roussetus aegyptiacus papillomavirus type 1]                            | 2.00E-08 |
| th | 171 | NODE_140652_length_141_cov_4.460993 | YP_004346968 | L1 [Zalophus californianus papillomavirus 1]                                | 3.00E-08 |
| th | 136 | NODE_173337_length_106_cov_7.160378 | BAL14429     | hypothetical protein [Human papillomavirus type 126]                        | 3.00E-08 |
| th | 252 | NODE_222695_length_222_cov_5.360360 | NP_040305    | E6 protein [Human papillomavirus - 1]                                       | 3.00E-08 |
| th | 130 | NODE_53260_length_100_cov_3.090000  | YP_002117841 | E1 [Tursiops truncatus papillomavirus 1]                                    | 3.00E-08 |
| th | 128 | NODE_118201_length_98_cov_2.489796  | ACX32353     | E1 [Human papillomavirus type 42]                                           | 6.00E-08 |
| th | 129 | NODE_205690_length_99_cov_4.383838  | YP_717913    | L1 [Roussetus aegyptiacus papillomavirus type 1]                            | 6.00E-08 |
| th | 87  | node_533385                         | YP_717909    | E1 [Roussetus aegyptiacus papillomavirus type 1]                            | 6.00E-08 |
| th | 170 | NODE_116922_length_140_cov_3.185714 | NP_694432    | putative replication protein E1 [Bovine papillomavirus - 5]                 | 7.00E-08 |
| th | 129 | node_119099                         | ABP99779     | E2 [Human papillomavirus type 18]                                           | 7.00E-08 |
| th | 169 | NODE_190809_length_139_cov_6.863309 | YP_003858577 | E2 [Gammmapapillomavirus HPV127]                                            | 7.00E-08 |
| th | 124 | NODE_262501_length_94_cov_2.234043  | YP_717913    | L1 [Roussetus aegyptiacus papillomavirus type 1]                            | 7.00E-08 |
| th | 115 | node_185604                         | ADH29821     | replication protein E1 [Human papillomavirus type 123]                      | 8.00E-08 |
| th | 116 | node_260989                         | YP_717909    | E1 [Roussetus aegyptiacus papillomavirus type 1]                            | 8.00E-08 |
| th | 224 | NODE_95666_length_194_cov_2.432990  | YP_004111309 | E6 [Human papillomavirus type 148]                                          | 1.00E-07 |
| th | 211 | 90374                               | NP_040896    | hypothetical protein HpV63gp1 [Human papillomavirus type 63]                | 2.00E-07 |
| th | 136 | 190457                              | ACC99401     | E1 [Macaca fascicularis papillomavirus type 10]                             | 2.00E-07 |
| th | 114 | NODE_115069_length_84_cov_3.035714  | NP_043449    | minor capsid protein L2 [Human papillomavirus 61]                           | 2.00E-07 |
| th | 115 | NODE_150384_length_85_cov_5.541176  | BAL14429     | hypothetical protein [Human papillomavirus type 126]                        | 2.00E-07 |
| th | 100 | NODE_204893_length_70_cov_2.585714  | P08341       | Major capsid protein L1 [Bovine papillomavirus 3]                           | 2.00E-07 |
| th | 115 | NODE_24535_length_85_cov_2.070588   | AAG37280     | E1 protein [Human papillomavirus]                                           | 2.00E-07 |
| th | 213 | NODE_55668_length_183_cov_12.868853 | AEP82743     | E1 [Canine papillomavirus 10]                                               | 2.00E-07 |
| th | 131 | NODE_175355_length_101_cov_4.623763 | YP_717913    | L1 [Roussetus aegyptiacus papillomavirus type 1]                            | 3.00E-07 |
| th | 105 | NODE_184080_length_75_cov_2.293333  | YP_249604    | L1 [Procyon lotor papillomavirus 1]                                         | 3.00E-07 |
| th | 252 | NODE_50441_length_222_cov_2.959460  | YP_249604    | L1 [Procyon lotor papillomavirus 1]                                         | 3.00E-07 |
| th | 95  | node_169560                         | YP_224227    | major capsid protein [Erethizon dorsatum papillomavirus type 1]             | 4.00E-07 |
| th | 139 | node_320523                         | NP_040891    | hypothetical protein HpV4gp3 [Human papillomavirus type 4]                  | 4.00E-07 |
| th | 300 | 683653                              | YP_717912    | L2 [Roussetus aegyptiacus papillomavirus type 1]                            | 5.00E-07 |
| th | 324 | 683880                              | YP_717909    | E1 [Roussetus aegyptiacus papillomavirus type 1]                            | 5.00E-07 |
| th | 233 | NODE_22335_length_203_cov_4.551724  | NP_040897    | hypothetical protein HpV63gp1 [Human papillomavirus type 63]                | 5.00E-07 |
| th | 82  | node_447737                         | YP_002235541 | L2 [Sus scrofa papillomavirus type 1]                                       | 5.00E-07 |
| th | 638 | NODE_76475_length_608_cov_2.883224  | YP_717901    | putative transforming protein [Canine papillomavirus 3]                     | 5.00E-07 |
| th | 126 | NODE_78139_length_96_cov_2.760417   | AAO48993     | major capsid protein [Human papillomavirus]                                 | 5.00E-07 |
| th | 186 | NODE_105385_length_156_cov_2.160256 | YP_249600    | E1 [Procyon lotor papillomavirus 1]                                         | 6.00E-07 |
| th | 153 | node_143041                         | YP_002756550 | L2 protein [Human papillomavirus 112]                                       | 6.00E-07 |
| th | 100 | node_851474                         | ACC99401     | E1 [Macaca fascicularis papillomavirus type 10]                             | 6.00E-07 |
| th | 96  | NODE_251730_length_66_cov_2.954545  | YP_717912    | L2 [Roussetus aegyptiacus papillomavirus type 1]                            | 8.00E-07 |
| th | 94  | node_375732                         | ACA61505     | L1 protein [Bovine papillomavirus BAA5-Japan]                               | 8.00E-07 |
| th | 107 | node_599874                         | CAW42263     | E1 protein [Human papillomavirus type 105]                                  | 8.00E-07 |
| th | 157 | NODE_102484_length_127_cov_4.811024 | YP_001955935 | minor capsid protein [Bandicoot papillomatosis carcinomatosis virus type 2] | 1.00E-06 |
| th | 213 | NODE_124846_length_183_cov_2.109290 | YP_717912    | L2 [Roussetus aegyptiacus papillomavirus type 1]                            | 1.00E-06 |
| th | 97  | node_1821054                        | AAL06737     | putative replication protein E1 [Human papillomavirus type 86]              | 1.00E-06 |
| th | 176 | NODE_33161_length_146_cov_8.130137  | NP_057847    | minor capsid protein L2 [Rabbit oral papillomavirus]                        | 1.00E-06 |
| th | 226 | NODE_40199_length_196_cov_3.831633  | YP_717912    | L2 [Roussetus aegyptiacus papillomavirus type 1]                            | 1.00E-06 |
| th | 144 | NODE_8848_length_114_cov_2.807018   | YP_002756548 | E2 protein [Human papillomavirus 112]                                       | 1.00E-06 |
| th | 149 | NODE_107474_length_119_cov_5.697479 | YP_249604    | L1 [Procyon lotor papillomavirus 1]                                         | 2.00E-06 |
| th | 117 | NODE_128806_length_87_cov_3.172414  | NP_041784    | early protein [Human papillomavirus type 26]                                | 2.00E-06 |
| th | 201 | NODE_163841_length_171_cov_7.210526 | NP_056818    | late protein [Canine oral papillomavirus]                                   | 2.00E-06 |
| th | 99  | node_185442                         | YP_249604    | L1 [Procyon lotor papillomavirus 1]                                         | 2.00E-06 |
| th | 84  | node_799971                         | ABE73478     | major capsid protein [Koala papillomavirus isolate KoAA1]                   | 2.00E-06 |
| th | 90  | node_961649                         | NP_040294    | hypothetical protein [Human papillomavirus type 41]                         | 2.00E-06 |
| th | 243 | 294016                              | NP_597740    | regulatory protein E2 [Human papillomavirus - 1]                            | 3.00E-06 |
| th | 381 | NODE_173589_length_351_cov_4.606838 | CAW42236     | E7 protein [Human papillomavirus type 100]                                  | 3.00E-06 |
| th | 597 | 677170                              | YP_004857848 | L1 [Canine papillomavirus 8]                                                | 4.00E-06 |
| th | 98  | node_619379                         | ACX32356     | L1 [Human papillomavirus type 42]                                           | 4.00E-06 |
| th | 120 | NODE_159307_length_90_cov_2.555556  | ABP99835     | E2 [Human papillomavirus type 45]                                           | 5.00E-06 |
| th | 175 | 503652                              | YP_249604    | L1 [Procyon lotor papillomavirus 1]                                         | 7.00E-06 |
| th | 166 | NODE_108075_length_136_cov_3.014706 | ADH29821     | replication protein E1 [Human papillomavirus type 123]                      | 7.00E-06 |
| th | 117 | NODE_158075_length_87_cov_3.022989  | AET11874     | E1 protein [Human Papillomavirus type 153]                                  | 7.00E-06 |
| th | 131 | NODE_89863_length_101_cov_3.079208  | Q05134       | early protein [Human papillomavirus type 12]                                | 7.00E-06 |
| th | 222 | NODE_184192_length_192_cov_4.260417 | YP_717909    | E1 [Roussetus aegyptiacus papillomavirus type 1]                            | 9.00E-06 |
| th | 86  | node_23064                          | YP_003204681 | L1 [Canine papillomavirus 6]                                                | 9.00E-06 |
| th | 139 | node_235354                         | YP_717912    | L2 [Roussetus aegyptiacus papillomavirus type 1]                            | 9.00E-06 |
| th | 83  | node_650894                         | NP_042019    | L1 protein [Mastomys natalensis papillomavirus]                             | 9.00E-06 |
| th | 95  | node_836842                         | ACC78262     | L1 protein [Human papillomavirus FA75/K188-03]                              | 9.00E-06 |

|         |     |                                    |                                     |                                                                                 |                                                              |          |
|---------|-----|------------------------------------|-------------------------------------|---------------------------------------------------------------------------------|--------------------------------------------------------------|----------|
| th      | 106 | NODE_20730_length_76_cov_2.421053  | YP_717907                           | E6 [Rousettus aegyptiacus papillomavirus type 1]                                | 1.00E-05                                                     |          |
| th      | 92  | NODE_40204_length_62_cov_2.548387  | AC146050                            | E1 [Feline papillomavirus type 2]                                               | 1.00E-05                                                     |          |
| th      | 130 | NODE_40995_length_100_cov_3.320000 | ABX56058                            | E1 [Macaca fascicularis papillomavirus type 7]                                  | 1.00E-05                                                     |          |
| th      | 137 | 449318                             | P50801                              | putative L2 [Human papillomavirus type 70]                                      | 2.00E-05                                                     |          |
| th      | 106 | NODE_219834_length_76_cov_3.013158 | AAZ03735                            | early protein 1 [Feline papillomavirus]                                         | 2.00E-05                                                     |          |
| th      | 115 | NODE_42035_length_85_cov_3.011765  | YP_004169265                        | E1 [Human papillomavirus type 128]                                              | 2.00E-05                                                     |          |
| th      | 143 | NODE_63330_length_113_cov_3.256637 | YP_003858578                        | L2 [Gammapapillomavirus HPV127]                                                 | 2.00E-05                                                     |          |
| th      | 94  | NODE_93039_length_64_cov_2.718750  | NP_042016                           | E1 protein [Mastomys natalensis papillomavirus]                                 | 2.00E-05                                                     |          |
| th      | 171 | 211562                             | YP_717907                           | E6 [Rousettus aegyptiacus papillomavirus type 1]                                | 3.00E-05                                                     |          |
| th      | 225 | 678709                             | BAL14429                            | hypothetical protein [Human papillomavirus type 126]                            | 3.00E-05                                                     |          |
| th      | 91  | node_1043427                       | ABS12699                            | E1 [Sus scrofa papillomavirus 1]                                                | 3.00E-05                                                     |          |
| th      | 78  | node_1342461                       | NP_057848                           | major capsid protein L1 [Rabbit oral papillomavirus]                            | 3.00E-05                                                     |          |
| th      | 84  | node_147553                        | YP_717909                           | E1 [Rousettus aegyptiacus papillomavirus type 1]                                | 3.00E-05                                                     |          |
| th      | 125 | NODE_157993_length_95_cov_2.778947 | ACZ58406                            | early protein E2 [Human papillomavirus type 115]                                | 3.00E-05                                                     |          |
| th      | 84  | node_178717                        | AC146053                            | L1 [Feline papillomavirus type 2]                                               | 3.00E-05                                                     |          |
| th      | 98  | NODE_40555_length_68_cov_2.220588  | ACOS8660                            | putative minor capsid protein L2 [Ovine papillomavirus 3]                       | 3.00E-05                                                     |          |
| th      | 134 | NODE_79444_length_104_cov_2.788461 | ADQ85968                            | E1 [Human papillomavirus type 133]                                              | 3.00E-05                                                     |          |
| th      | 180 | NODE_90170_length_150_cov_2.713333 | YP_717913                           | L1 [Rousettus aegyptiacus papillomavirus type 1]                                | 3.00E-05                                                     |          |
| th      | 337 | 678870                             | CAW42216                            | E1 protein [Human papillomavirus type 98]                                       | 4.00E-05                                                     |          |
| th      | 91  | node_889260                        | NP_043439                           | replication protein E1 [Human papillomavirus type 60]                           | 4.00E-05                                                     |          |
| th      | 147 | 293587                             | YP_004111311                        | E1 [Human papillomavirus type 148]                                              | 5.00E-05                                                     |          |
| th      | 264 | NODE_56837_length_234_cov_5.905983 | CAW42216                            | E1 protein [Human papillomavirus type 98]                                       | 5.00E-05                                                     |          |
| th      | 104 | node_767795                        | YP_717912                           | L2 [Rousettus aegyptiacus papillomavirus type 1]                                | 5.00E-05                                                     |          |
| th      | 227 | NODE_14101_length_197_cov_2.756345 | YP_717912                           | L2 [Rousettus aegyptiacus papillomavirus type 1]                                | 6.00E-05                                                     |          |
| th      | 103 | NODE_152206_length_73_cov_2.821918 | P50813                              | major capsid protein L1 [Human papillomavirus type 37]                          | 6.00E-05                                                     |          |
| th      | 96  | node_492731                        | YP_001595472                        | major structural protein [Bandicoot papillomatosis carcinomatosis virus type 1] | 6.00E-05                                                     |          |
| th      | 336 | NODE_61141_length_306_cov_4.009804 | AAX86617                            | L2 protein [Lynx rufus papillomavirus type 1]                                   | 6.00E-05                                                     |          |
| th      | 114 | NODE_64722_length_84_cov_4.452381  | YP_717913                           | L1 [Rousettus aegyptiacus papillomavirus type 1]                                | 6.00E-05                                                     |          |
| th      | 115 | NODE_87835_length_85_cov_7.635294  | YP_717910                           | E2 [Rousettus aegyptiacus papillomavirus type 1]                                | 6.00E-05                                                     |          |
| th      | 96  | node_1447855                       | ACT32130                            | replication protein [Macaca fascicularis papillomavirus type 11]                | 8.00E-05                                                     |          |
| th      | 94  | node_24220                         | NP_057848                           | major capsid protein L1 [Rabbit oral papillomavirus]                            | 8.00E-05                                                     |          |
| th      | 132 | NODE_6577_length_102_cov_5.872549  | YP_001648802                        | replication protein [Canine papillomavirus 4]                                   | 8.00E-05                                                     |          |
| th      | 118 | NODE_71543_length_88_cov_6.386364  | NP_041865                           | late protein [Human papillomavirus type 9]                                      | 8.00E-05                                                     |          |
| th      | 205 | 210785                             | NP_040901                           | hypothetical protein HpV63gp1 [Human papillomavirus type 63]                    | 1.00E-04                                                     |          |
| th      | 122 | 231501                             | NP_040898                           | hypothetical protein HpV63gp1 [Human papillomavirus type 63]                    | 1.00E-04                                                     |          |
| th      | 689 | 680954                             | NP_848025                           | L1 protein [Felis domesticus papillomavirus type 1]                             | 1.00E-04                                                     |          |
| th      | 171 | node_129210                        | YP_717912                           | L2 [Rousettus aegyptiacus papillomavirus type 1]                                | 1.00E-04                                                     |          |
| th      | 84  | node_1322338                       | NP_040294                           | hypothetical protein [Human papillomavirus type 41]                             | 1.00E-04                                                     |          |
| th      | 80  | node_1394496                       | YP_717909                           | E1 [Rousettus aegyptiacus papillomavirus type 1]                                | 1.00E-04                                                     |          |
| th      | 82  | node_1578434                       | AEE80936                            | major capsid protein [Bovine papillomavirus]                                    | 1.00E-04                                                     |          |
| th      | 102 | NODE_160210_length_72_cov_2.944444 | CAF05790                            | protein L1a [Human papillomavirus type 43]                                      | 1.00E-04                                                     |          |
| th      | 233 | NODE_42252_length_203_cov_4.320197 | NP_040309                           | major capsid protein L1 [Human papillomavirus - 1]                              | 1.00E-04                                                     |          |
| th      | 237 | NODE_75805_length_207_cov_2.429952 | NP_040293                           | hypothetical protein [Human papillomavirus type 41]                             | 1.00E-04                                                     |          |
| th      | 99  | NODE_77212_length_69_cov_2.565217  | ABA61877                            | L1 [Uncia uncia papillomavirus type 1]                                          | 1.00E-04                                                     |          |
| th      | 132 | node_917305                        | ACV30150                            | E1 [Human papillomavirus type 118]                                              | 1.00E-04                                                     |          |
| th      | 89  | node_968353                        | YP_002427696                        | major capsid protein [Erinaceus europaeus papillomavirus]                       | 1.00E-04                                                     |          |
| tblastx | th  | 99                                 | node_1611495                        | AY904724                                                                        | Panthera leo persica papillomavirus type 1                   | 1.44E-06 |
|         | th  | 116                                | 400948                              | HM011570                                                                        | Gammapapillomavirus HPV127 isolate R3a                       | 1.96E-06 |
|         | th  | 109                                | 536165                              | FJ492744                                                                        | Canine papillomavirus 6 isolate Zurich                       | 1.96E-06 |
|         | th  | 92                                 | node_1007267                        | DQ366842                                                                        | Rousettus aegyptiacus papillomavirus type 1                  | 1.98E-06 |
|         | th  | 90                                 | node_512820                         | Y15174                                                                          | Human papillomavirus type 76 E6                              | 1.98E-06 |
|         | th  | 89                                 | node_383341                         | AF227240                                                                        | Rabbit oral papillomavirus                                   | 1.98E-06 |
|         | th  | 87                                 | node_468755                         | AF377865                                                                        | Feline papillomavirus putative transforming protein E6 (E6)  | 2.20E-06 |
|         | th  | 178                                | NODE_168705_length_148_cov_6.554054 | DQ269468                                                                        | Old World harvest mouse papillomavirus                       | 2.63E-06 |
|         | th  | 109                                | node_289964                         | AF227240                                                                        | Rabbit oral papillomavirus                                   | 2.70E-06 |
|         | th  | 103                                | 2965                                | GU117620                                                                        | Delphinus delphis papillomavirus                             | 2.70E-06 |
|         | th  | 102                                | NODE_37986_length_72_cov_3.777778   | EU918767                                                                        | Human papillomavirus type 59 isolate LZod68-59               | 2.71E-06 |
|         | th  | 95                                 | NODE_51876_length_65_cov_4.676923   | FJ379293                                                                        | European hedgehog papillomavirus                             | 2.71E-06 |
|         | th  | 87                                 | node_1401208                        | X56147                                                                          | Human papillomavirus type 41                                 | 3.26E-06 |
|         | th  | 126                                | NODE_223905_length_96_cov_2.281250  | AJ243287                                                                        | Cottontail rabbit papillomavirus subtype b complete genome   | 3.31E-06 |
|         | th  | 401                                | 687407                              | EF028290                                                                        | Macaca fascicularis papillomavirus type 1                    | 3.33E-06 |
|         | th  | 91                                 | node_1010722                        | AF322245                                                                        | Human papillomavirus isolate HPV-alb-10 E1 protein (E1) gene | 3.73E-06 |
|         | th  | 89                                 | node_566425                         | DQ366842                                                                        | Rousettus aegyptiacus papillomavirus type 1                  | 3.73E-06 |
|         | th  | 77                                 | node_1249914                        | U06714                                                                          | Human papillomavirus type 1a (3-3)                           | 3.75E-06 |
|         | th  | 109                                | NODE_191146_length_79_cov_2.329114  | X74480                                                                          | Human papillomavirus type 49 genomic DNA                     | 5.09E-06 |
|         | th  | 78                                 | node_79073                          | X56147                                                                          | Human papillomavirus type 41                                 | 5.10E-06 |
|         | th  | 77                                 | node_452898                         | DQ366842                                                                        | Rousettus aegyptiacus papillomavirus type 1                  | 5.16E-06 |
|         | th  | 80                                 | node_309207                         | X74467                                                                          | Human papillomavirus type 14D genomic DNA                    | 7.05E-06 |
|         | th  | 90                                 | node_1153504                        | X70828                                                                          | Human papillomavirus type 63 complete genome                 | 7.07E-06 |
|         | th  | 87                                 | node_1234296                        | JN171845                                                                        | Human papillomavirus type 153                                | 9.70E-06 |
|         | th  | 96                                 | NODE_265889_length_66_cov_2.212121  | EF558841                                                                        | Macaca fascicularis papillomavirus type 4 Mac54              | 1.33E-05 |
|         | th  | 93                                 | node_505006                         | AB211993                                                                        | Human papillomavirus type 27b DNA                            | 1.33E-05 |
|         | th  | 88                                 | node_1189426                        | U31792                                                                          | Human papillomavirus type 60                                 | 1.33E-05 |
|         | th  | 87                                 | node_584441                         | EU277647                                                                        | Bandicoot papillomatosis carcinomatosis virus type 2         | 1.33E-05 |
|         | th  | 85                                 | node_743622                         | DQ366842                                                                        | Rousettus aegyptiacus papillomavirus type 1                  | 1.33E-05 |
|         | th  | 82                                 | node_1343108                        | U31792                                                                          | Human papillomavirus type 60                                 | 1.48E-05 |
|         | th  | 79                                 | node_433683                         | JF755418                                                                        | Peromyscus papillomavirus type 1 strain M-14 PmPV1           | 1.78E-05 |
|         | th  | 83                                 | NODE_88206_length_53_cov_5.849057   | AF531420                                                                        | Human papillomavirus type 92                                 | 1.83E-05 |
|         | th  | 79                                 | node_1105999                        | AF227240                                                                        | Rabbit oral papillomavirus                                   | 1.83E-05 |
|         | th  | 78                                 | node_1367577                        | FJ598133                                                                        | Rhesus papillomavirus type 1b isolate Mac686                 | 1.83E-05 |
|         | th  | 106                                | node_325264                         | DQ366842                                                                        | Rousettus aegyptiacus papillomavirus type 1                  | 2.42E-05 |
|         | th  | 107                                | NODE_35045_length_77_cov_2.103896   | GU014531                                                                        | Macaca fascicularis papillomavirus type 2 isolate Mac191     | 2.49E-05 |
|         | th  | 99                                 | NODE_64493_length_69_cov_2.376812   | EF591300                                                                        | Rhesus papillomavirus type 1b isolate Mac170                 | 2.50E-05 |
|         | th  | 85                                 | node_1525241                        | AF498323                                                                        | Equus caballus papillomavirus type 1                         | 2.52E-05 |
|         | th  | 205                                | NODE_20147_length_175_cov_10.074286 | EU796884                                                                        | Feline papillomavirus type 2 isolate Main Coon 2007          | 2.65E-05 |
|         | th  | 101                                | NODE_131455_length_71_cov_4.028169  | DQ366842                                                                        | Rousettus aegyptiacus papillomavirus type 1                  | 3.10E-05 |
|         | th  | 91                                 | node_226236                         | HQ537712                                                                        | Human papillomavirus type 35 isolate Z141                    | 3.45E-05 |
|         | th  | 86                                 | node_37541                          | GU117622                                                                        | Phocoena phocoena papillomavirus 2                           | 3.45E-05 |
|         | th  | 102                                | node_60278                          | U85660                                                                          | Human papillomavirus RTRX7                                   | 3.73E-05 |
|         | th  | 90                                 | node_1260588                        | AF531420                                                                        | Human papillomavirus type 92                                 | 3.76E-05 |
|         | th  | 106                                | node_83447                          | FM212639                                                                        | Human papillomavirus type 108                                | 4.71E-05 |
|         | th  | 87                                 | node_71555                          | DQ366842                                                                        | Rousettus aegyptiacus papillomavirus type 1                  | 4.75E-05 |
|         | th  | 99                                 | 168374                              | AF227240                                                                        | Rabbit oral papillomavirus                                   | 6.49E-05 |
|         | th  | 85                                 | node_1128374                        | DQ366842                                                                        | Rousettus aegyptiacus papillomavirus type 1                  | 6.52E-05 |
|         | th  | 90                                 | node_690460                         | FJ492744                                                                        | Canine papillomavirus 6 isolate Zurich                       | 8.32E-05 |
|         | th  | 122                                | NODE_190089_length_92_cov_2.978261  | HQ912791                                                                        | Camelus dromedarius papillomavirus type 2                    | 8.83E-05 |
|         | th  | 83                                 | node_263496                         | AB646346                                                                        | Human papillomavirus type 126 DNA                            | 8.97E-05 |
|         | th  | 79                                 | node_343578                         | DQ366842                                                                        | Rousettus aegyptiacus papillomavirus type 1                  | 8.98E-05 |
|         | th  | 79                                 | node_688651                         | DQ664501                                                                        | Mastomys coucha papillomavirus 2                             | 8.98E-05 |
|         | th  | 79                                 | node_1759238                        | DQ366842                                                                        | Rousettus aegyptiacus papillomavirus type 1                  | 9.65E-05 |
| ur      | 87  | node_468317                        | 3696278                             | Rousettus aegyptiacus papillomavirus type 1                                     | 4.50E-08                                                     |          |
| ur      | 79  | node_565960                        | 3696278                             | Rousettus aegyptiacus papillomavirus type 1                                     | 1.89E-05                                                     |          |

|                |         |    |      |                                      |              |                                                                                   |           |
|----------------|---------|----|------|--------------------------------------|--------------|-----------------------------------------------------------------------------------|-----------|
| Parvoviridae   | blastn  | th | 619  | NODE_8618_length_589_cov_3.624788    | AY189948     | Blattella germanica densovirus                                                    | 0         |
|                | blastx  | th | 1528 | node176_9_9_893755                   | ADZ48579     | nonstructural protein [Parvovirus partridge/PA147/ITA/2008]                       | 1.00E-64  |
|                |         | th | 357  | 683421                               | ACD68163     | structural protein [Bombyx mori densovirus Zhenjiang]                             | 2.00E-16  |
|                |         | th | 249  | NODE_64599_length_219_cov_5.684931   | AET79240     | capsid protein VP1 [Bovine parvovirus-1]                                          | 1.00E-15  |
|                |         | th | 275  | node7292_0_0_7345                    | AET79240     | capsid protein VP1 [Bovine parvovirus-1]                                          | 1.00E-15  |
|                | tblastx | th | 143  | NODE_143257_length_113_cov_3.911505  | HM362436     | Parvovirus partridge/PA147/ITA/2008 nonstructural protein gene                    | 1.48E-05  |
|                |         | th | 130  | NODE_22624_length_100_cov_2.730000   | EU623082     | Bombyx mori densovirus Zhenjiang segment VD1                                      | 4.67E-05  |
|                |         | th | 135  | NODE_140328_length_105_cov_10.619047 | EU623082     | Bombyx mori densovirus Zhenjiang segment VD1                                      | 6.39E-05  |
|                |         | ur | 992  | 182867                               | 1351680      | Haemagogus equinus densovirus nonstructural protein 1                             | 1.17E-31  |
|                |         | ur | 874  | 185239                               | 13650782     | Parvovirus partridge/PA147/ITA/2008 nonstructural protein gene                    | 4.76E-08  |
| Picornaviridae | blastn  | lu | 109  | NODE_420260_length_79_cov_1.468354   | AF105342     | Coxsackievirus B6 strain Schmitt                                                  | 1.00E-04  |
|                |         | ur | 593  | NODE_7448_length_563_cov_38.733570   | EU143282     | Aichi virus isolate J-4404 polyprotein gene                                       | 9.00E-53  |
|                |         | ur | 608  | 185867                               | EU143282     | Aichi virus isolate J-4404 polyprotein gene                                       | 2.00E-44  |
|                |         | ur | 1033 | 181630                               | EU143282     | Aichi virus isolate J-4404 polyprotein gene                                       | 4.00E-44  |
|                | blastx  | ur | 295  | NODE_689_length_265_cov_27.305660    | AAV28657     | polyprotein [Aichi virus]                                                         | 1.00E-23  |
|                |         | ur | 117  | 84431                                | ACX33797     | polyprotein [Aichi virus]                                                         | 3.00E-13  |
|                |         | ur | 87   | node_653853                          | AEO19724     | polyprotein [Canine kobuvirus US-PC0082]                                          | 2.00E-05  |
| Polymoviridae  | blastx  | th | 102  | NODE_103172_length_72_cov_2.722222   | ADQ54207     | VP1 [Gorilla gorilla gorilla polymavirus 1]                                       | 6.00E-08  |
| Poxviridae     | blastn  | th | 552  | 678625                               | U60315       | Molluscum contagiosum virus subtype 1                                             | 3.00E-77  |
|                |         | th | 787  | node1036_0_0_38518                   | DQ356948     | Crocodilepox virus                                                                | 1.00E-28  |
|                |         | th | 248  | NODE_16995_length_218_cov_8.715596   | DQ356948     | Crocodilepox virus                                                                | 1.00E-22  |
|                |         | th | 84   | node_863768                          | AY386265     | Bovine papular stomatitis virus strain BV-AR02                                    | 3.00E-09  |
|                |         | th | 85   | node_106281                          | GQ329670     | Pseudocowpox virus strain VR634                                                   | 2.00E-05  |
|                | blastx  | th | 804  | 682392                               | NP_044038    | MC087R [Molluscum contagiosum virus subtype 1]                                    | 5.00E-93  |
|                |         | th | 704  | 682835                               | NP_044050    | MC099R [Molluscum contagiosum virus subtype 1]                                    | 6.00E-78  |
|                |         | th | 815  | 685744                               | NP_044041    | MC090R [Molluscum contagiosum virus subtype 1]                                    | 4.00E-59  |
|                |         | th | 395  | 683062                               | NP_044036    | MC085L [Molluscum contagiosum virus subtype 1]                                    | 9.00E-49  |
|                |         | th | 355  | NODE_56749_length_325_cov_9.916924   | NP_044028    | MC077R [Molluscum contagiosum virus subtype 1]                                    | 7.00E-43  |
|                |         | th | 321  | node_19088                           | NP_044050    | MC099R [Molluscum contagiosum virus subtype 1]                                    | 9.00E-38  |
|                |         | th | 314  | NODE_10643_length_284_cov_4.024648   | NP_043982    | MC031L [Molluscum contagiosum virus subtype 1]                                    | 2.00E-35  |
|                |         | th | 494  | 686834                               | NP_043982    | MC031L [Molluscum contagiosum virus subtype 1]                                    | 1.00E-34  |
|                |         | th | 486  | 686305                               | NP_044048    | MC097R [Molluscum contagiosum virus subtype 1]                                    | 9.00E-33  |
|                |         | th | 378  | NODE_25400_length_348_cov_9.629311   | NP_044048    | MC097R [Molluscum contagiosum virus subtype 1]                                    | 2.00E-32  |
|                |         | th | 446  | 689118                               | NP_044028    | MC077R [Molluscum contagiosum virus subtype 1]                                    | 4.00E-32  |
|                |         | th | 278  | NODE_78585_length_248_cov_3.326613   | NP_955210    | CNP187 RNA polymerase associated protein RAP94 [Canarypox virus]                  | 4.00E-31  |
|                |         | th | 794  | 686158                               | NP_043993    | MC042L [Molluscum contagiosum virus subtype 1]                                    | 5.00E-25  |
|                |         | th | 454  | 681320                               | NP_938288    | 32L [Yaba monkey tumor virus]                                                     | 1.00E-23  |
|                |         | th | 226  | node_8323                            | NP_957991    | ORF082 hypothetical protein [Bovine papular stomatitis virus]                     | 3.00E-11  |
|                |         | th | 342  | 680797                               | NP_957991    | ORF082 hypothetical protein [Bovine papular stomatitis virus]                     | 2.00E-10  |
|                |         | th | 141  | NODE_16716_length_111_cov_4.090090   | NP_039091    | Myristylated membrane protein [Fowlpox virus]                                     | 2.00E-10  |
|                |         | th | 288  | node6646_0_0_2081                    | NP_043983    | MC032L [Molluscum contagiosum virus subtype 1]                                    | 2.00E-10  |
|                |         | th | 148  | NODE_156976_length_118_cov_5.957627  | NP_043982    | MC031L [Molluscum contagiosum virus subtype 1]                                    | 5.00E-10  |
|                |         | th | 523  | NODE_106014_length_493_cov_4.188641  | AA857938     | similar to variola C15L and vaccinia F11L [Molluscum contagiosum virus subtype 1] | 2.00E-09  |
|                |         | th | 166  | NODE_38602_length_136_cov_2.161765   | NP_044019    | MC068R [Molluscum contagiosum virus subtype 1]                                    | 4.00E-09  |
|                |         | th | 213  | NODE_157912_length_183_cov_3.901639  | NP_043968    | MC017L [Molluscum contagiosum virus subtype 1]                                    | 1.00E-08  |
|                |         | th | 86   | node_881152                          | NP_044036    | MC085L [Molluscum contagiosum virus subtype 1]                                    | 2.00E-07  |
|                |         | th | 137  | node_224400                          | NP_044021    | MC070R [Molluscum contagiosum virus subtype 1]                                    | 6.00E-07  |
|                |         | th | 137  | NODE_122199_length_107_cov_2.644860  | YP_004821443 | NTPase [Yoka poxvirus]                                                            | 1.00E-06  |
|                |         | th | 233  | NODE_40359_length_203_cov_12.221675  | NP_043993    | MC042L [Molluscum contagiosum virus subtype 1]                                    | 1.00E-06  |
|                |         | th | 89   | node_381449                          | NP_044016    | MC065L [Molluscum contagiosum virus subtype 1]                                    | 3.00E-06  |
|                |         | th | 434  | 682722                               | NP_044095    | MC144R [Molluscum contagiosum virus subtype 1]                                    | 3.00E-05  |
|                |         | th | 222  | NODE_100720_length_192_cov_5.125000  | ABD51466     | O1L [Squirrel poxvirus]                                                           | 6.00E-05  |
|                |         | th | 109  | node_463664                          | AB572327     | L1R [Goatpox virus]                                                               | 1.00E-04  |
|                | tblastx | th | 130  | NODE_66687_length_100_cov_4.320000   | U60315       | Molluscum contagiosum virus subtype 1                                             | 1.03E-06  |
|                |         | th | 109  | NODE_160310_length_79_cov_3.417722   | U86906       | Molluscum contagiosum virus subtype 1                                             | 1.96E-06  |
|                |         | th | 80   | node_1799129                         | AY689437     | Deerpox virus W-1170-84                                                           | 6.84E-06  |
| Retroviridae   | blastn  | lu | 194  | 1495715                              | Y18305       | Jaagsiekte sheep retrovirus env gene                                              | 5.00E-21  |
|                |         | lu | 80   | node_828314                          | DQ199106     | HIV-1 isolate TZB0540 from Tanzania envelope glycoprotein (env) gene              | 5.00E-06  |
|                |         | th | 337  | 677686                               | AF033811     | Moloney murine leukemia virus                                                     | 4.00E-158 |
|                |         | ur | 189  | 135317                               | AF033811     | Moloney murine leukemia virus                                                     | 5.00E-85  |
|                |         | ur | 160  | NODE_29710_length_130_cov_4.084615   | AF033811     | Moloney murine leukemia virus                                                     | 6.00E-74  |
|                |         | ur | 78   | node_152817                          | V01185       | Genome of murine sarcoma virus (strain 124)                                       | 6.00E-20  |
|                | blastx  | lu | 362  | 416903                               | AAC31805     | pol polyprotein [Mus dunni endogenous virus]                                      | 2.00E-43  |
|                |         | lu | 315  | 817779                               | AAD43256     | polymerase [Simian retrovirus 2]                                                  | 2.00E-29  |
|                |         | lu | 382  | node_216999                          | P04502       | polyprotein [Kirsten murine sarcoma virus]                                        | 5.00E-27  |
|                |         | lu | 354  | NODE_194604_length_324_cov_3.500000  | ABC26818     | polymerase [Reticuloendotheliosis virus]                                          | 8.00E-27  |
|                |         | lu | 295  | 1138514                              | ADK26403     | protease [Ovine enzootic nasal tumor virus]                                       | 8.00E-23  |
|                |         | lu | 318  | NODE_299285_length_288_cov_2.649306  | Q9TTC0       | envelope protein [Phascolarctos cinereus]                                         | 8.00E-23  |
|                |         | lu | 188  | NODE_4256_length_158_cov_3.367089    | ADK26414     | pol protein [Ovine enzootic nasal tumor virus]                                    | 2.00E-22  |
|                |         | lu | 211  | 479816                               | AD150272     | gag-pro protein [Enzootic nasal tumour virus of goats]                            | 2.00E-21  |
|                |         | lu | 320  | 1521182                              | P51517       | Pol polyprotein [Mason-Pfizer monkey virus]                                       | 3.00E-21  |
|                |         | lu | 291  | 1441797                              | CAA33367     | reverse transcriptase (476 AA) [Woolly monkey sarcoma virus]                      | 3.00E-19  |
|                |         | lu | 200  | 832845                               | YP_001994915 | hypothetical mature IN protein [Friend murine leukemia virus]                     | 6.00E-19  |
|                |         | lu | 486  | 1522873                              | ABD46828     | gag protein [Reticuloendotheliosis virus]                                         | 6.00E-19  |
|                |         | lu | 212  | NODE_413038_length_182_cov_3.230769  | CCB84243     | putative gag-pro-pol polyprotein [PreXMRV-2]                                      | 2.00E-18  |
|                |         | lu | 229  | NODE_349841_length_199_cov_3.291457  | ADC52787     | protease [Simian retrovirus 4]                                                    | 4.00E-18  |
|                |         | lu | 212  | NODE_384288_length_182_cov_3.005495  | AJ22867      | pol [Simian endogenous retrovirus vero ATCC CCL-81]                               | 4.00E-18  |
|                |         | lu | 268  | 460775                               | ACJ65652     | gag protein [Reticuloendotheliosis virus]                                         | 1.00E-17  |
|                |         | lu | 264  | NODE_107090_length_234_cov_4.756410  | AAA66452     | aspartyl protease [Squirrel monkey retrovirus-H]                                  | 1.00E-17  |
|                |         | lu | 483  | 1526068                              | AAPO6678     | env protein [Human endogenous retrovirus HCML-ARV]                                | 2.00E-17  |
|                |         | lu | 181  | NODE_607037_length_151_cov_6.874172  | ACT75573     | gag protein [Reticuloendotheliosis virus]                                         | 2.00E-17  |
|                |         | lu | 182  | NODE_487511_length_152_cov_2.572368  | YP_002000606 | Hypothetical mature RT protein [Gibbon ape leukemia virus]                        | 3.00E-17  |
|                |         | lu | 296  | NODE_286709_length_266_cov_4.691730  | CAA33367     | reverse transcriptase (476 AA) [Woolly monkey sarcoma virus]                      | 9.00E-17  |
|                |         | lu | 235  | NODE_301383_length_205_cov_2.092683  | AAPO6677     | pol protein [Human endogenous retrovirus HCML-ARV]                                | 2.00E-16  |
|                |         | lu | 234  | node_203552                          | AEB80488     | pol protein [Reticuloendotheliosis virus]                                         | 4.00E-16  |
|                |         | lu | 160  | node_1065491                         | NP_862831    | gag protein [Enzootic nasal tumour virus of goats]                                | 6.00E-16  |
|                |         | lu | 179  | 834504                               | AAPO6678     | env protein [Human endogenous retrovirus HCML-ARV]                                | 1.00E-15  |
|                |         | lu | 168  | NODE_24778_length_138_cov_1.181159   | AAPO6678     | env protein [Human endogenous retrovirus HCML-ARV]                                | 2.00E-15  |
|                |         | lu | 235  | 1220525                              | AAPO6678     | env protein [Human endogenous retrovirus HCML-ARV]                                | 1.00E-14  |
|                |         | lu | 212  | NODE_270731_length_182_cov_5.818681  | ADJ50271     | gag protein [Enzootic nasal tumour virus of goats]                                | 1.00E-14  |
|                |         | lu | 335  | 1526500                              | ACT75573     | gag protein [Reticuloendotheliosis virus]                                         | 2.00E-14  |
|                |         | lu | 184  | node_1183839                         | AEB80488     | pol protein [Reticuloendotheliosis virus]                                         | 7.00E-14  |
|                |         | lu | 206  | NODE_127551_length_176_cov_6.414773  | AEB80488     | pol protein [Reticuloendotheliosis virus]                                         | 9.00E-14  |
|                |         | lu | 147  | node_364767                          | AEB80488     | pol protein [Reticuloendotheliosis virus]                                         | 2.00E-13  |
|                |         | lu | 164  | NODE_131664_length_134_cov_3.723881  | ADK26418     | pol protein [Ovine enzootic nasal tumor virus]                                    | 2.00E-12  |
|                |         | lu | 139  | node_710044                          | AEB80488     | pol protein [Reticuloendotheliosis virus]                                         | 2.00E-12  |
|                |         | lu | 277  | 1342510                              | ADJ50271     | gag protein [Enzootic nasal tumour virus of goats]                                | 5.00E-12  |
|                |         | lu | 129  | 912597                               | BAA89659     | gag-pol precursor polyprotein [Baboon endogenous virus strain M7]                 | 6.00E-12  |
|                |         | lu | 157  | 616263                               | ADK26415     | envelope protein [Ovine enzootic nasal tumor virus]                               | 1.00E-11  |
|                |         | lu | 328  | 1492386                              | T29096       | gag polyprotein - murine endogenous retrovirus ERV-L [Mus musculus]               | 1.00E-11  |
|                |         | lu | 284  | NODE_153910_length_254_cov_2.078740  | AAPO6677     | pol protein [Human endogenous retrovirus HCML-ARV]                                | 1.00E-11  |

|    |     |                                      |              |                                                                             |          |
|----|-----|--------------------------------------|--------------|-----------------------------------------------------------------------------|----------|
| lu | 140 | node_1264642                         | ADW95139     | envelope protein [Odocoileus hemionus endogenous retrovirus]                | 2.00E-11 |
| lu | 197 | NODE_587150_length_167_cov_2.089820  | T29097       | pro-pol-dUTPase polyprotein - murine endogenous retrovirus ERV-L (fragment) | 2.00E-11 |
| lu | 128 | 357710                               | AAF60207     | reverse transcriptase [Jaagsiekte sheep retrovirus]                         | 3.00E-11 |
| lu | 141 | NODE_51143_length_111_cov_2.234234   | AAPO6677     | pol protein [Human endogenous retrovirus HCML-ARV]                          | 4.00E-11 |
| lu | 324 | NODE_62009_length_294_cov_2.442177   | T29097       | pro-pol-dUTPase polyprotein - murine endogenous retrovirus ERV-L (fragment) | 4.00E-11 |
| lu | 212 | 1140650                              | ADIS0271     | gag protein [Enzootic nasal tumour virus of goats]                          | 5.00E-11 |
| lu | 143 | NODE_57108_length_113_cov_3.159292   | YP_002000607 | Hypothetical mature IN protein [Gibbon ape leukemia virus]                  | 5.00E-11 |
| lu | 176 | 759900                               | NP_955577    | pol gene polyprotein [Feline leukemia virus]                                | 7.00E-11 |
| lu | 125 | 1078700                              | AAZ57418     | polymerase [Reticuloendotheliosis virus]                                    | 9.00E-11 |
| lu | 165 | NODE_343848_length_135_cov_2.807407  | YP_001994915 | hypothetical mature IN protein [Friend murine leukemia virus]               | 9.00E-11 |
| lu | 157 | 1385582                              | BAI16549     | Gag-Pol precursor polyprotein [RD114 retrovirus]                            | 1.00E-10 |
| lu | 119 | 568642                               | AAZ57418     | polymerase [Reticuloendotheliosis virus]                                    | 5.00E-10 |
| lu | 147 | NODE_1052537_length_117_cov_1.487180 | BAL04139     | gag-pol precursor polyprotein [Feline leukemia virus]                       | 8.00E-10 |
| lu | 150 | NODE_148769_length_120_cov_1.700000  | P26810       | Pol polyprotein [Murine leukaemia virus]                                    | 8.00E-10 |
| lu | 227 | 792972                               | AAPO6677     | pol protein [Human endogenous retrovirus HCML-ARV]                          | 1.00E-09 |
| lu | 124 | NODE_453122_length_94_cov_1.393617   | AAPO6678     | env protein [Human endogenous retrovirus HCML-ARV]                          | 1.00E-09 |
| lu | 141 | 339135                               | ABA28277     | reverse transcriptase [Human endogenous retrovirus K]                       | 2.00E-09 |
| lu | 225 | 879778                               | AEB80488     | pol protein [Reticuloendotheliosis virus]                                   | 2.00E-09 |
| lu | 352 | 1523430                              | O92815       | Gag-Pol polyprotein [Walleye dermal sarcoma virus]                          | 2.00E-09 |
| lu | 306 | 1524495                              | T29097       | pro-pol-dUTPase polyprotein - murine endogenous retrovirus ERV-L (fragment) | 2.00E-09 |
| lu | 118 | NODE_191593_length_88_cov_1.363636   | AAZ57418     | polymerase [Reticuloendotheliosis virus]                                    | 2.00E-09 |
| lu | 156 | node_228114                          | P04025       | pol protein [Simian retrovirus 1]                                           | 2.00E-09 |
| lu | 107 | NODE_23998_length_77_cov_2.948052    | AEJ22867     | pol [Simian endogenous retrovirus vero ATCC CCL-81]                         | 2.00E-09 |
| lu | 127 | 236089                               | CAA33367     | reverse transcriptase (476 AA) [Woolly monkey sarcoma virus]                | 3.00E-09 |
| lu | 94  | NODE_1020633_length_64_cov_2.140625  | ABL74442     | pol protein [Porcine endogenous retrovirus C]                               | 4.00E-09 |
| lu | 146 | NODE_336692_length_116_cov_1.051724  | ADI76909     | pol protein [Simian retrovirus 1]                                           | 4.00E-09 |
| lu | 191 | NODE_95106_length_161_cov_1.981367   | AAPO6677     | pol protein [Human endogenous retrovirus HCML-ARV]                          | 4.00E-09 |
| lu | 113 | NODE_1241866_length_83_cov_1.542169  | AAPO6678     | env protein [Human endogenous retrovirus HCML-ARV]                          | 5.00E-09 |
| lu | 129 | node_655571                          | ADW95139     | envelope protein [Odocoileus hemionus endogenous retrovirus]                | 5.00E-09 |
| lu | 117 | NODE_686194_length_87_cov_2.735632   | YP_241114    | gag-pol fusion [Ovine enzootic nasal tumour virus]                          | 5.00E-09 |
| lu | 152 | NODE_186278_length_122_cov_1.598361  | AAD45226     | pol [Jaagsiekte sheep retrovirus]                                           | 7.00E-09 |
| lu | 114 | NODE_811746_length_84_cov_4.238095   | AAPO6678     | env protein [Human endogenous retrovirus HCML-ARV]                          | 7.00E-09 |
| lu | 153 | 1374956                              | ACT75573     | gag protein [Reticuloendotheliosis virus]                                   | 9.00E-09 |
| lu | 127 | NODE_148848_length_97_cov_2.618557   | YP_001994915 | hypothetical mature IN protein [Friend murine leukemia virus]               | 9.00E-09 |
| lu | 168 | NODE_296863_length_138_cov_3.413043  | YP_223871    | protease/polymerase [Reticuloendotheliosis virus]                           | 9.00E-09 |
| lu | 121 | node_306511                          | ACT75573     | gag protein [Reticuloendotheliosis virus]                                   | 9.00E-09 |
| lu | 137 | NODE_372668_length_107_cov_4.813084  | NP_862833    | gag-pro-pol fusion [Enzootic nasal tumour virus of goats]                   | 9.00E-09 |
| lu | 114 | NODE_622855_length_84_cov_1.071429   | CCB84243     | putative gag-pro-pol polyprotein [PreXMRV-2]                                | 9.00E-09 |
| lu | 164 | 262922                               | AAC31806     | envelope glycoprotein [Mus dunni endogenous virus]                          | 1.00E-08 |
| lu | 681 | 1520580                              | T29097       | pro-pol-dUTPase polyprotein - murine endogenous retrovirus ERV-L (fragment) | 1.00E-08 |
| lu | 122 | NODE_408415_length_92_cov_5.010870   | ADK26413     | protease [Ovine enzootic nasal tumor virus]                                 | 1.00E-08 |
| lu | 219 | 696892                               | AAC31806     | envelope glycoprotein [Mus dunni endogenous virus]                          | 3.00E-08 |
| lu | 130 | NODE_381867_length_100_cov_1.920000  | T29097       | pro-pol-dUTPase polyprotein - murine endogenous retrovirus ERV-L (fragment) | 3.00E-08 |
| lu | 117 | NODE_899795_length_87_cov_1.425287   | BAI16549     | Gag-Pol precursor polyprotein [RD114 retrovirus]                            | 3.00E-08 |
| lu | 104 | NODE_668771_length_74_cov_3.864865   | AAN77283     | Gag-Pro-Pol protein [Python molurus endogenous retrovirus]                  | 4.00E-08 |
| lu | 279 | NODE_601487_length_249_cov_3.847389  | T29097       | pro-pol-dUTPase polyprotein - murine endogenous retrovirus ERV-L (fragment) | 5.00E-08 |
| lu | 217 | 677849                               | AAO46147     | envelope glycoprotein [Recombinant M-MuLV/RaLV retrovirus]                  | 6.00E-08 |
| lu | 111 | NODE_401274_length_81_cov_2.962963   | AEI84616     | putative gag-pro-pol polyprotein [Xenotopic MuLV-related virus RKO]         | 8.00E-08 |
| lu | 108 | 1423692                              | NP_057933    | Pr180 [Moloney murine leukemia virus]                                       | 1.00E-07 |
| lu | 169 | NODE_131314_length_139_cov_1.215827  | T29097       | pro-pol-dUTPase polyprotein - murine endogenous retrovirus ERV-L (fragment) | 1.00E-07 |
| lu | 94  | 289264                               | AAC14144     | polymerase [Human endogenous retrovirus K]                                  | 2.00E-07 |
| lu | 221 | 751102                               | ADIS0273     | gag-pro-pol protein [Enzootic nasal tumour virus of goats]                  | 2.00E-07 |
| lu | 144 | 1363926                              | AAPO6677     | pol protein [Human endogenous retrovirus HCML-ARV]                          | 2.00E-07 |
| lu | 152 | NODE_208665_length_122_cov_2.918033  | AAPO6678     | env protein [Human endogenous retrovirus HCML-ARV]                          | 2.00E-07 |
| lu | 98  | node_4285327                         | CAA28802     | endonuclease (391 AA) [Murine leukemia virus]                               | 2.00E-07 |
| lu | 137 | NODE_572208_length_107_cov_1.102804  | T29097       | pro-pol-dUTPase polyprotein - murine endogenous retrovirus ERV-L (fragment) | 2.00E-07 |
| lu | 160 | NODE_584781_length_130_cov_2.076923  | BAI16549     | Gag-Pol precursor polyprotein [RD114 retrovirus]                            | 2.00E-07 |
| lu | 114 | node_638415                          | BAA89659     | gag-pol precursor polyprotein [Baboon endogenous virus strain M7]           | 2.00E-07 |
| lu | 110 | 644499                               | NP_057933    | Pr180 [Moloney murine leukemia virus]                                       | 3.00E-07 |
| lu | 109 | NODE_1133078_length_79_cov_1.164557  | P04024       | prt [Simian retrovirus 1]                                                   | 4.00E-07 |
| lu | 177 | NODE_67508_length_147_cov_9.986395   | YP_002000602 | hypothetical mature p30(CA) protein [Gibbon ape leukemia virus]             | 4.00E-07 |
| lu | 145 | NODE_852969_length_115_cov_2.182609  | AAA79247     | putative reverse transcriptase [Murine leukemia virus]                      | 4.00E-07 |
| lu | 198 | 1417344                              | AAPO6676     | retroviral gag protein [Human endogenous retrovirus HCML-ARV]               | 5.00E-07 |
| lu | 87  | node_3622574                         | AEL75190     | envelope protein [XMRV]                                                     | 5.00E-07 |
| lu | 109 | NODE_670020_length_79_cov_1.164557   | AEB80488     | pol protein [Reticuloendotheliosis virus]                                   | 5.00E-07 |
| lu | 238 | NODE_766392_length_208_cov_2.745192  | AEB80488     | pol protein [Reticuloendotheliosis virus]                                   | 5.00E-07 |
| lu | 89  | node_2361008                         | NP_862831    | gag protein [Enzootic nasal tumour virus of goats]                          | 6.00E-07 |
| lu | 150 | NODE_288162_length_120_cov_2.041667  | AAPO6678     | env protein [Human endogenous retrovirus HCML-ARV]                          | 6.00E-07 |
| lu | 173 | NODE_396360_length_143_cov_3.090909  | T29097       | pro-pol-dUTPase polyprotein - murine endogenous retrovirus ERV-L (fragment) | 7.00E-07 |
| lu | 326 | 715115                               | O92815       | Gag-Pol polyprotein [Walleye dermal sarcoma virus]                          | 8.00E-07 |
| lu | 194 | 1358960                              | O92815       | Gag-Pol polyprotein [Walleye dermal sarcoma virus]                          | 8.00E-07 |
| lu | 90  | node_1658436                         | AAZ57418     | polymerase [Reticuloendotheliosis virus]                                    | 8.00E-07 |
| lu | 196 | node_219178                          | ACI65652     | gag protein [Reticuloendotheliosis virus]                                   | 8.00E-07 |
| lu | 192 | NODE_384868_length_162_cov_4.277778  | AAPO6676     | retroviral gag protein [Human endogenous retrovirus HCML-ARV]               | 8.00E-07 |
| lu | 105 | NODE_924166_length_75_cov_1.493333   | AAPO6678     | env protein [Human endogenous retrovirus HCML-ARV]                          | 8.00E-07 |
| lu | 171 | NODE_965848_length_141_cov_7.063830  | BAL04139     | gag-pol precursor polyprotein [Feline leukemia virus]                       | 8.00E-07 |
| lu | 78  | 816024                               | YP_241114    | gag-pro-pol fusion [Ovine enzootic nasal tumour virus]                      | 1.00E-06 |
| lu | 511 | 1521170                              | P31792       | Pol polyprotein [Felis silvestris]                                          | 1.00E-06 |
| lu | 105 | NODE_1027762_length_75_cov_1.053333  | AAPO6678     | env protein [Human endogenous retrovirus HCML-ARV]                          | 1.00E-06 |
| lu | 102 | NODE_1512_length_72_cov_1.833333     | T29097       | pro-pol-dUTPase polyprotein - murine endogenous retrovirus ERV-L (fragment) | 1.00E-06 |
| lu | 88  | node_1530837                         | YP_002000602 | hypothetical mature p30(CA) protein [Gibbon ape leukemia virus]             | 1.00E-06 |
| lu | 168 | NODE_205553_length_138_cov_2.050725  | AAPO6677     | pol protein [Human endogenous retrovirus HCML-ARV]                          | 1.00E-06 |
| lu | 141 | NODE_627234_length_111_cov_1.747748  | YP_223871    | protease/polymerase [Reticuloendotheliosis virus]                           | 1.00E-06 |
| lu | 128 | NODE_717348_length_98_cov_1.530612   | YP_002000606 | Hypothetical mature RT protein [Gibbon ape leukemia virus]                  | 1.00E-06 |
| lu | 239 | NODE_132366_length_209_cov_1.449761  | ABC26818     | polymerase [Reticuloendotheliosis virus]                                    | 2.00E-06 |
| lu | 131 | NODE_266899_length_101_cov_3.504951  | T29097       | pro-pol-dUTPase polyprotein - murine endogenous retrovirus ERV-L (fragment) | 2.00E-06 |
| lu | 85  | node_3035460                         | AAZ57418     | polymerase [Reticuloendotheliosis virus]                                    | 2.00E-06 |
| lu | 288 | NODE_382684_length_258_cov_2.019380  | AEN03777     | envelope polyprotein [Avian leukosis virus]                                 | 2.00E-06 |
| lu | 112 | node_4056180                         | NP_862833    | gag-pro-pol fusion [Enzootic nasal tumour virus of goats]                   | 2.00E-06 |
| lu | 96  | NODE_733678_length_66_cov_2.242424   | ADU55774     | pol protein [XMRV]                                                          | 2.00E-06 |
| lu | 150 | NODE_920784_length_120_cov_1.483333  | AAPO6676     | retroviral gag protein [Human endogenous retrovirus HCML-ARV]               | 2.00E-06 |
| lu | 143 | NODE_953092_length_113_cov_1.318584  | AAPO6677     | pol protein [Human endogenous retrovirus HCML-ARV]                          | 2.00E-06 |
| lu | 118 | NODE_98427_length_88_cov_1.534091    | NP_056891    | RT-IN [Mason-Pfizer monkey virus]                                           | 2.00E-06 |
| lu | 256 | 177244                               | AEB80488     | pol protein [Reticuloendotheliosis virus]                                   | 3.00E-06 |
| lu | 165 | 967454                               | AAPO6677     | pol protein [Human endogenous retrovirus HCML-ARV]                          | 3.00E-06 |
| lu | 160 | NODE_13083_length_130_cov_3.453846   | AEB80488     | pol protein [Reticuloendotheliosis virus]                                   | 4.00E-06 |
| lu | 124 | NODE_217873_length_94_cov_1.691489   | AEB80488     | pol protein [Reticuloendotheliosis virus]                                   | 4.00E-06 |
| lu | 95  | node_2546677                         | AAD43256     | polymerase [Simian retrovirus 2]                                            | 5.00E-06 |
| lu | 155 | NODE_417704_length_125_cov_1.680000  | CAA77116     | env protein [Jaagsiekte sheep retrovirus]                                   | 5.00E-06 |
| lu | 117 | NODE_500140_length_87_cov_2.597701   | AEB80488     | pol protein [Reticuloendotheliosis virus]                                   | 5.00E-06 |
| lu | 129 | 1420089                              | AAPO6678     | env protein [Human endogenous retrovirus HCML-ARV]                          | 7.00E-06 |
| lu | 103 | NODE_271532_length_73_cov_5.013699   | AEB80488     | pol protein [Reticuloendotheliosis virus]                                   | 7.00E-06 |

|    |     |                                      |              |                                                                             |          |
|----|-----|--------------------------------------|--------------|-----------------------------------------------------------------------------|----------|
| lu | 240 | NODE_277552_length_210_cov_5.704762  | T29097       | pro-pol-dUTPase polyprotein - murine endogenous retrovirus ERV-L (fragment) | 7.00E-06 |
| lu | 163 | NODE_730447_length_133_cov_3.466165  | ACT75573     | gag protein [Reticuloendotheliosis virus]                                   | 7.00E-06 |
| lu | 88  | node_7700459                         | CCE45536     | protease                                                                    | 7.00E-06 |
| lu | 150 | NODE_1023660_length_120_cov_1.800000 | O92815       | Gag-Pol polyprotein [Walleye dermal sarcoma virus]                          | 9.00E-06 |
| lu | 93  | node_1869384                         | P04025       | pol protein [Simian retrovirus 1]                                           | 9.00E-06 |
| lu | 82  | node_4298158                         | AEB80488     | pol protein [Reticuloendotheliosis virus]                                   | 9.00E-06 |
| lu | 107 | NODE_475506_length_77_cov_1.506493   | NP_041186    | pol protein [Jaagsiekte sheep retrovirus]                                   | 9.00E-06 |
| lu | 201 | NODE_906203_length_171_cov_3.011696  | T29097       | pro-pol-dUTPase polyprotein - murine endogenous retrovirus ERV-L (fragment) | 9.00E-06 |
| lu | 192 | NODE_123290_length_162_cov_2.654321  | T29097       | pro-pol-dUTPase polyprotein - murine endogenous retrovirus ERV-L (fragment) | 1.00E-05 |
| lu | 108 | NODE_131112_length_78_cov_17.307692  | ADIS0273     | gag-pro-pol protein [Enzootic nasal tumour virus of goats]                  | 1.00E-05 |
| lu | 87  | node_2099812                         | ADIS0271     | gag protein [Enzootic nasal tumour virus of goats]                          | 1.00E-05 |
| lu | 91  | NODE_483902_length_61_cov_14.229508  | AAL87856     | pol protein [porcine endogenous retrovirus]                                 | 1.00E-05 |
| lu | 89  | node_1195578                         | AEB80488     | pol protein [Reticuloendotheliosis virus]                                   | 2.00E-05 |
| lu | 88  | node_13828                           | AAZ57418     | polymerase [Reticuloendotheliosis virus]                                    | 2.00E-05 |
| lu | 112 | node_1990278                         | AEB80488     | pol protein [Reticuloendotheliosis virus]                                   | 2.00E-05 |
| lu | 112 | node_2098149                         | AEB80488     | pol protein [Reticuloendotheliosis virus]                                   | 2.00E-05 |
| lu | 101 | NODE_28236_length_71_cov_25.014084   | AEB80488     | pol protein [Reticuloendotheliosis virus]                                   | 2.00E-05 |
| lu | 106 | node_300550                          | AEB80488     | pol protein [Reticuloendotheliosis virus]                                   | 2.00E-05 |
| lu | 130 | node_46244                           | ADK26415     | envelope protein [Ovine enzootic nasal tumor virus]                         | 2.00E-05 |
| lu | 78  | node_5399875                         | ADG27337     | truncated pol protein [Porcine endogenous retrovirus]                       | 2.00E-05 |
| lu | 92  | NODE_595509_length_62_cov_4.532258   | ABD46828     | gag protein [Reticuloendotheliosis virus]                                   | 2.00E-05 |
| lu | 88  | node_6282472                         | NP_056891    | RT-IN [Mason-Pfizer monkey virus]                                           | 2.00E-05 |
| lu | 99  | node_7382599                         | AAA82052     | polymerase [Human endogenous retrovirus K]                                  | 2.00E-05 |
| lu | 113 | NODE_830736_length_83_cov_2.542169   | YP_223871    | protease/polymerase [Reticuloendotheliosis virus]                           | 2.00E-05 |
| lu | 103 | NODE_955656_length_73_cov_1.082192   | ACT75573     | gag protein [Reticuloendotheliosis virus]                                   | 2.00E-05 |
| lu | 113 | NODE_974408_length_83_cov_2.795181   | NP_955577    | pol gene polyprotein [Feline leukemia virus]                                | 2.00E-05 |
| lu | 144 | 116321                               | ABD46828     | gag protein [Reticuloendotheliosis virus]                                   | 3.00E-05 |
| lu | 199 | node_103609                          | AEB80488     | pol protein [Reticuloendotheliosis virus]                                   | 3.00E-05 |
| lu | 106 | node_1330103                         | AEB80488     | pol protein [Reticuloendotheliosis virus]                                   | 3.00E-05 |
| lu | 99  | NODE_223800_length_69_cov_3.144928   | NP_041184    | gag protein [Jaagsiekte sheep retrovirus]                                   | 3.00E-05 |
| lu | 130 | NODE_378317_length_100_cov_1.440000  | T29097       | pro-pol-dUTPase polyprotein - murine endogenous retrovirus ERV-L (fragment) | 3.00E-05 |
| lu | 90  | node_4708983                         | AEB80488     | pol protein [Reticuloendotheliosis virus]                                   | 3.00E-05 |
| lu | 124 | NODE_648967_length_94_cov_6.500000   | ABD46828     | gag protein [Reticuloendotheliosis virus]                                   | 3.00E-05 |
| lu | 185 | NODE_735945_length_155_cov_1.987097  | T29097       | pro-pol-dUTPase polyprotein - murine endogenous retrovirus ERV-L (fragment) | 3.00E-05 |
| lu | 107 | NODE_873631_length_77_cov_3.454545   | ACJ65652     | gag protein [Reticuloendotheliosis virus]                                   | 3.00E-05 |
| lu | 81  | node_877007                          | NP_862831    | gag protein [Enzootic nasal tumour virus of goats]                          | 3.00E-05 |
| lu | 153 | NODE_411_length_123_cov_1.845528     | T29097       | pro-pol-dUTPase polyprotein - murine endogenous retrovirus ERV-L (fragment) | 4.00E-05 |
| lu | 183 | 1381008                              | AAB66527     | protease [multiple sclerosis associated retrovirus]                         | 5.00E-05 |
| lu | 147 | NODE_559371_length_117_cov_2.136752  | AAP06676     | retroviral gag protein [Human endogenous retrovirus HCML-ARV]               | 5.00E-05 |
| lu | 123 | 982707                               | AEB80488     | pol protein [Reticuloendotheliosis virus]                                   | 6.00E-05 |
| lu | 80  | 996221                               | YP_001994915 | hypothetical mature IN protein [Friend murine leukemia virus]               | 6.00E-05 |
| lu | 127 | NODE_133838_length_97_cov_1.783505   | AAB19067     | pol protein [Human endogenous retrovirus]                                   | 6.00E-05 |
| lu | 91  | node_2539337                         | ACJ65652     | gag protein [Reticuloendotheliosis virus]                                   | 6.00E-05 |
| lu | 86  | node_2930155                         | AEB80488     | pol protein [Reticuloendotheliosis virus]                                   | 6.00E-05 |
| lu | 84  | node_2987081                         | AAV68488     | gag-pol polyprotein [Murine leukemia virus]                                 | 6.00E-05 |
| lu | 89  | 477355                               | ADK26415     | envelope protein [Ovine enzootic nasal tumor virus]                         | 8.00E-05 |
| lu | 186 | 782033                               | ADK26418     | pol protein [Ovine enzootic nasal tumor virus]                              | 8.00E-05 |
| lu | 87  | node_1720000                         | AEB80488     | pol protein [Reticuloendotheliosis virus]                                   | 8.00E-05 |
| lu | 114 | node_459525                          | ACJ65652     | gag protein [Reticuloendotheliosis virus]                                   | 8.00E-05 |
| lu | 81  | node_486869                          | ADI76909     | pol protein [Simian retrovirus 1]                                           | 8.00E-05 |
| lu | 92  | NODE_565686_length_62_cov_1.758065   | ADK26413     | protease [Ovine enzootic nasal tumor virus]                                 | 8.00E-05 |
| lu | 109 | node_660023                          | AAP73837     | pol [Human betaretrovirus]                                                  | 8.00E-05 |
| lu | 77  | node_6748001                         | ADIS0271     | gag protein [Enzootic nasal tumour virus of goats]                          | 8.00E-05 |
| lu | 115 | NODE_675240_length_85_cov_1.023529   | AAP06678     | env protein [Human endogenous retrovirus HCML-ARV]                          | 8.00E-05 |
| lu | 117 | NODE_784218_length_87_cov_1.517241   | AAV68488     | gag-pol polyprotein [Murine leukemia virus]                                 | 8.00E-05 |
| lu | 108 | 382337                               | AEB80488     | pol protein [Reticuloendotheliosis virus]                                   | 1.00E-04 |
| lu | 117 | 586708                               | CGB84243     | putative gag-pro-pol polyprotein [PreXMRV-2]                                | 1.00E-04 |
| lu | 150 | 1109467                              | T29097       | pro-pol-dUTPase polyprotein - murine endogenous retrovirus ERV-L (fragment) | 1.00E-04 |
| lu | 87  | node_144585                          | NP_955577    | pol gene polyprotein [Feline leukemia virus]                                | 1.00E-04 |
| lu | 177 | NODE_171730_length_147_cov_2.129252  | ADIS0273     | gag-pro-pol protein [Enzootic nasal tumour virus of goats]                  | 1.00E-04 |
| lu | 78  | node_2678689                         | ADIS0271     | gag protein [Enzootic nasal tumour virus of goats]                          | 1.00E-04 |
| lu | 97  | NODE_344430_length_67_cov_1.134328   | AAL69910     | Pr180 gag-pro-pol polyprotein [Moloney murine leukemia virus]               | 1.00E-04 |
| lu | 142 | NODE_353406_length_112_cov_2.428571  | T29097       | pro-pol-dUTPase polyprotein - murine endogenous retrovirus ERV-L (fragment) | 1.00E-04 |
| lu | 122 | NODE_519909_length_92_cov_2.043478   | AAP06676     | retroviral gag protein [Human endogenous retrovirus HCML-ARV]               | 1.00E-04 |
| lu | 136 | NODE_61012_length_106_cov_1.679245   | BAA03767     | gag pro pol polyprotein [Mouse mammary tumor virus]                         | 1.00E-04 |
| lu | 105 | NODE_993190_length_75_cov_1.013333   | AAZ57418     | polymerase [Reticuloendotheliosis virus]                                    | 1.00E-04 |
| th | 567 | node2071_0_0_36607                   | AEB80488     | pol protein [Reticuloendotheliosis virus]                                   | 3.00E-57 |
| th | 566 | NODE_62045_length_536_cov_5.259328   | ABC26818     | polymerase [Reticuloendotheliosis virus]                                    | 4.00E-44 |
| th | 355 | node4654_0_0_5734                    | YP_223871    | protease/polymerase [Reticuloendotheliosis virus]                           | 3.00E-38 |
| th | 326 | 155766                               | YP_223871    | protease/polymerase [Reticuloendotheliosis virus]                           | 1.00E-33 |
| th | 493 | NODE_58317_length_463_cov_3.736501   | AAZ57418     | polymerase [Reticuloendotheliosis virus]                                    | 9.00E-33 |
| th | 333 | 683665                               | P04502       | polyprotein [Kirsten murine sarcoma virus]                                  | 9.00E-25 |
| th | 219 | NODE_105806_length_189_cov_9.666667  | ADK26414     | pol protein [Ovine enzootic nasal tumor virus]                              | 9.00E-22 |
| th | 414 | 687427                               | ABD46828     | gag protein [Reticuloendotheliosis virus]                                   | 4.00E-21 |
| th | 336 | 684846                               | Q9TTC1       | pol protein [Phascocartus cinereus]                                         | 1.00E-19 |
| th | 186 | NODE_35541_length_156_cov_3.147436   | AAC14144     | polymerase [Human endogenous retrovirus K]                                  | 3.00E-19 |
| th | 321 | node_32819                           | AEB80488     | pol protein [Reticuloendotheliosis virus]                                   | 1.00E-17 |
| th | 214 | node12043_0_0_2188                   | YP_002000606 | Hypothetical mature RT protein [Gibbon ape leukemia virus]                  | 1.00E-17 |
| th | 209 | NODE_41461_length_179_cov_3.653631   | ADIS0274     | env protein [Enzootic nasal tumour virus of goats]                          | 1.00E-15 |
| th | 172 | NODE_60501_length_142_cov_8.485915   | BAJ16549     | Gag-Pol precursor polyprotein [RD114 retrovirus]                            | 9.00E-14 |
| th | 392 | NODE_99628_length_362_cov_4.378453   | ACT75573     | gag protein [Reticuloendotheliosis virus]                                   | 3.00E-13 |
| th | 476 | 682082                               | ACT75573     | gag protein [Reticuloendotheliosis virus]                                   | 1.00E-12 |
| th | 181 | NODE_106124_length_151_cov_2.576159  | AEB80488     | pol protein [Reticuloendotheliosis virus]                                   | 2.00E-12 |
| th | 218 | NODE_71713_length_188_cov_3.851064   | ADK35878     | pol protein [Porcine endogenous retrovirus C]                               | 2.00E-12 |
| th | 215 | NODE_187287_length_185_cov_2.875676  | AAP06677     | pol protein [Human endogenous retrovirus HCML-ARV]                          | 4.00E-12 |
| th | 272 | NODE_76523_length_242_cov_10.855371  | ACT75573     | gag protein [Reticuloendotheliosis virus]                                   | 1.00E-11 |
| th | 188 | 647454                               | ACT75573     | gag protein [Reticuloendotheliosis virus]                                   | 4.00E-11 |
| th | 334 | 686537                               | T29097       | pro-pol-dUTPase polyprotein - murine endogenous retrovirus ERV-L (fragment) | 4.00E-11 |
| th | 293 | NODE_118662_length_263_cov_8.467681  | T29097       | pro-pol-dUTPase polyprotein - murine endogenous retrovirus ERV-L (fragment) | 6.00E-11 |
| th | 131 | NODE_54696_length_101_cov_2.732673   | Q9TTC2       | gag protein [Phascocartus cinereus]                                         | 6.00E-11 |
| th | 241 | 136092                               | AAC98548     | pol polypeptide [Murine leukemia virus]                                     | 2.00E-10 |
| th | 237 | NODE_106666_length_207_cov_3.048309  | AAP06676     | retroviral gag protein [Human endogenous retrovirus HCML-ARV]               | 2.00E-10 |
| th | 146 | NODE_63888_length_116_cov_2.551724   | AAT76466     | envelope precursor protein [Feline leukemia virus]                          | 3.00E-10 |
| th | 185 | NODE_70302_length_155_cov_6.625806   | CAA61544     | pol protein [Human T-lymphotropic virus 2]                                  | 6.00E-10 |
| th | 230 | NODE_47479_length_200_cov_9.830000   | AAP06677     | pol protein [Human endogenous retrovirus HCML-ARV]                          | 1.00E-09 |
| th | 129 | NODE_22443_length_99_cov_2.383838    | AAC31805     | pol polyprotein [Mus dunni endogenous virus]                                | 9.00E-09 |
| th | 310 | node5845_0_0_1836                    | AAP06678     | env protein [Human endogenous retrovirus HCML-ARV]                          | 3.00E-08 |
| th | 264 | 680184                               | AAC31805     | pol polyprotein [Mus dunni endogenous virus]                                | 1.00E-07 |
| th | 335 | 682188                               | AEB80488     | pol protein [Reticuloendotheliosis virus]                                   | 1.00E-07 |
| th | 159 | node_518690                          | CAA71419     | protease [Human endogenous retrovirus K]                                    | 2.00E-07 |
| th | 106 | NODE_135385_length_76_cov_2.052632   | AAN77282     | Env [Python molurus endogenous retrovirus]                                  | 4.00E-07 |
| th | 108 | 6010                                 | YP_002000602 | hypothetical mature p30(CA) protein [Gibbon ape leukemia virus]             | 1.00E-06 |

|         |     |                                     |                                     |                                                                             |                                                                                        |          |
|---------|-----|-------------------------------------|-------------------------------------|-----------------------------------------------------------------------------|----------------------------------------------------------------------------------------|----------|
| th      | 483 | 679550                              | T29097                              | pro-pol-dUTPase polyprotein - murine endogenous retrovirus ERV-L (fragment) | 1.00E-06                                                                               |          |
| th      | 93  | node_823387                         | AEB80488                            | pol protein [Reticuloendotheliosis virus]                                   | 2.00E-06                                                                               |          |
| th      | 385 | NODE_76836_length_355_cov_3.890141  | T29097                              | pro-pol-dUTPase polyprotein - murine endogenous retrovirus ERV-L (fragment) | 4.00E-06                                                                               |          |
| th      | 96  | node_203331                         | AAN77283                            | Gag-Pro-Pol protein [Python molurus endogenous retrovirus]                  | 5.00E-06                                                                               |          |
| th      | 88  | node_1223602                        | AAV68488                            | gag-pol polyprotein [Murine leukemia virus]                                 | 9.00E-06                                                                               |          |
| th      | 263 | NODE_42753_length_233_cov_4.287554  | T29097                              | pro-pol-dUTPase polyprotein - murine endogenous retrovirus ERV-L (fragment) | 1.00E-05                                                                               |          |
| th      | 142 | node_245156                         | AAC31805                            | pol polyprotein [Mus dunni endogenous virus]                                | 2.00E-05                                                                               |          |
| th      | 164 | NODE_107982_length_134_cov_2.417910 | AAV68488                            | gag-pol polyprotein [Murine leukemia virus]                                 | 3.00E-05                                                                               |          |
| th      | 231 | node_134795                         | AD150274                            | env protein [Enzootic nasal tumour virus of goats]                          | 3.00E-05                                                                               |          |
| th      | 133 | NODE_137242_length_103_cov_6.174757 | ACT75573                            | gag protein [Reticuloendotheliosis virus]                                   | 4.00E-05                                                                               |          |
| th      | 100 | node_443736                         | Q9TTC1                              | pol protein [Phascocarcus cinereus]                                         | 4.00E-05                                                                               |          |
| th      | 244 | NODE_5280_length_214_cov_2.322430   | ACT75573                            | gag protein [Reticuloendotheliosis virus]                                   | 4.00E-05                                                                               |          |
| th      | 87  | 233261                              | AEB80488                            | pol protein [Reticuloendotheliosis virus]                                   | 6.00E-05                                                                               |          |
| th      | 96  | NODE_120071_length_66_cov_5.469697  | AEB80488                            | pol protein [Reticuloendotheliosis virus]                                   | 1.00E-04                                                                               |          |
| ur      | 489 | NODE_7253_length_459_cov_3.797386   | BAA22064                            | gag-pol polyprotein [precursor protein] [Friend murine leukemia virus]      | 1.00E-41                                                                               |          |
| tblastx | lu  | 195                                 | 434459                              | HE608663                                                                    | Bovine endogenous retrovirus beta 1 proviral partial pro gene                          | 8.86E-13 |
|         | lu  | 117                                 | NODE_1018611_length_87_cov_2.448276 | GQ375848                                                                    | Reticuloendotheliosis virus strain HLI071                                              | 1.30E-12 |
|         | lu  | 160                                 | NODE_395439_length_130_cov_2.100000 | AJ236117                                                                    | Epicrionops marmoratus retrovirus partial pol and pro genes                            | 1.51E-11 |
|         | lu  | 133                                 | node_872588                         | JO2034                                                                      | Baboon endogenous virus strain M7 proviral LTR                                         | 1.63E-09 |
|         | lu  | 158                                 | NODE_180403_length_128_cov_2.812500 | AJ225216                                                                    | RV-Horse partial mRNA for polyprotein                                                  | 3.36E-09 |
|         | lu  | 173                                 | NODE_64674_length_143_cov_1.286713  | AJ225216                                                                    | RV-Horse partial mRNA for polyprotein                                                  | 4.70E-09 |
|         | lu  | 277                                 | 857843                              | AJ506107                                                                    | Xenopus laevis endogenous retrovirus Xen1 complete proviral genome                     | 7.43E-09 |
|         | lu  | 84                                  | node_3967875                        | AJ225225                                                                    | RV-Rhinatreid caecilianII partial mRNA for polyprotein                                 | 2.32E-08 |
|         | lu  | 144                                 | NODE_334672_length_114_cov_1.842105 | AF356697                                                                    | Porcine endogenous retrovirus class E clone P14.1                                      | 3.42E-08 |
|         | lu  | 107                                 | NODE_1023359_length_77_cov_1.194805 | X99924                                                                      | Murine leukemia related virus genes encoding protease and reverse transcriptase        | 2.13E-07 |
|         | lu  | 86                                  | node_892917                         | GQ415646                                                                    | Reticuloendotheliosis virus strain HLR0901 from China                                  | 2.72E-06 |
|         | lu  | 137                                 | NODE_395670_length_107_cov_2.046729 | DQ387450                                                                    | Reticuloendotheliosis virus strain APC-566                                             | 3.66E-06 |
|         | lu  | 131                                 | NODE_755741_length_101_cov_1.306931 | GU292318                                                                    | Ovine enzootic nasal tumor virus isolate ENTV-1NA3                                     | 3.67E-06 |
|         | lu  | 91                                  | node_4461532                        | GQ415646                                                                    | Reticuloendotheliosis virus strain HLR0901 from China                                  | 3.73E-06 |
|         | lu  | 115                                 | NODE_900312_length_85_cov_1.082353  | GQ375848                                                                    | Reticuloendotheliosis virus strain HLI071                                              | 5.08E-06 |
|         | lu  | 108                                 | node_2952546                        | GQ415646                                                                    | Reticuloendotheliosis virus strain HLR0901 from China                                  | 5.09E-06 |
|         | lu  | 124                                 | node_857488                         | AY714522                                                                    | Murine leukemia virus isolate M-RV_15A integrase (pol) and envelope glycoprotein (env) | 9.56E-06 |
|         | lu  | 88                                  | node_256857                         | AB187565                                                                    | Murine leukemia virus Graffi GV-1.2 DNA                                                | 1.31E-05 |
|         | lu  | 112                                 | NODE_910729_length_82_cov_1.121951  | X99925                                                                      | Murine leukemia related virus genes encoding protease and reverse transcriptase        | 1.68E-05 |
|         | lu  | 77                                  | node_1030322                        | GQ415646                                                                    | Reticuloendotheliosis virus strain HLR0901 from China                                  | 2.45E-05 |
|         | lu  | 102                                 | NODE_473373_length_72_cov_3.833333  | AY842951                                                                    | Reticuloendotheliosis virus strain HA9901 from China                                   | 2.50E-05 |
|         | lu  | 103                                 | NODE_884016_length_73_cov_5.095891  | DQ387450                                                                    | Reticuloendotheliosis virus strain APC-566                                             | 3.43E-05 |
|         | lu  | 129                                 | NODE_84730_length_99_cov_1.444444   | GQ415646                                                                    | Reticuloendotheliosis virus strain HLR0901 from China                                  | 3.50E-05 |
|         | lu  | 110                                 | NODE_328138_length_80_cov_1.150000  | GQ415646                                                                    | Reticuloendotheliosis virus strain HLR0901 from China                                  | 4.69E-05 |
|         | lu  | 89                                  | node_2971580                        | GQ415646                                                                    | Reticuloendotheliosis virus strain HLR0901 from China                                  | 4.74E-05 |
|         | lu  | 89                                  | node_4676370                        | GQ415646                                                                    | Reticuloendotheliosis virus strain HLR0901 from China                                  | 7.44E-05 |
|         | th  | 89                                  | node_1492702                        | AJ225222                                                                    | RV-Pit viper partial mRNA for polyprotein                                              | 2.72E-06 |
|         | th  | 84                                  | node_1614906                        | GQ415646                                                                    | Reticuloendotheliosis virus strain HLR0901 from China                                  | 1.83E-05 |

| Samples      | Abbreviation | Assembly algorithm | Notation             |
|--------------|--------------|--------------------|----------------------|
| Throat swath |              | ABYSS              | xxx                  |
| Lung         | lu           | Velvet             | NODE_xxxx_length ... |
| Urine        | ur           | Metacortex         | node_xxxx            |
|              |              | MetaIDBA           | nodexxx_0_0_ ...     |
